# Supplementary material for: Limbic Expression of mRNA Coding for Chemoreceptors in Human Brain—Lessons from Brain Atlases
Source: MDPI journal article supplement (doi:10.3390/ijms22136858), 2021-06-25
Supplement: s1 [file s1]

| OR Expression (log2)  |             | AMYGDALA            |          |          |          |          |          |                    |          |          |          |          |          |                 |          |          |          |          |          |                 |          |          |          |          |          |
|-----------------------|-------------|---------------------|----------|----------|----------|----------|----------|--------------------|----------|----------|----------|----------|----------|-----------------|----------|----------|----------|----------|----------|-----------------|----------|----------|----------|----------|----------|
|                       |             | basolateral nucleus |          |          |          |          |          | basomedial nucleus |          |          |          |          |          | central nucleus |          |          |          |          |          | lateral nucleus |          |          |          |          |          |
|                       |             | 24 years            | 31 years | 39 years | 49 years | 55 years | 57 years | 24 years           | 31 years | 39 years | 49 years | 55 years | 57 years | 24 years        | 31 years | 39 years | 49 years | 55 years | 57 years | 24 years        | 31 years | 39 years | 49 years | 55 years | 57 years |
| Probe-name            | Gene-symbol |                     |          |          |          |          |          |                    |          |          |          |          |          |                 |          |          |          |          |          |                 |          |          |          |          |          |
| A_24_P409230          | OR10A2      | 3.3069              | 2.4955   | 2.9007   | 1.5535   | 5.0789   | 2.5170   | 3.0794             | 4.3968   | 3.7809   | 3.3977   | 4.0438   | 2.0578   | 2.6464          | 3.4103   | 3.3104   | 3.3090   | 3.9974   | 1.9073   | 3.0318          | 2.1900   | 4.1681   | 1.6098   | 4.6697   | 1.8263   |
| CUST_5622_Pi416261804 | OR10A2      | 5.0264              | 4.8543   | 4.9542   | 4.0720   | 5.8943   | 4.5243   | 5.0544             | 5.4380   | 5.5037   | 4.9433   | 4.9041   | 3.5788   | 4.0906          | 4.9643   | 5.0739   | 4.0043   | 4.3001   | 3.8022   | 4.7482          | 4.8532   | 5.2106   | 4.6582   | 5.4322   | 4.0972   |
| CUST_257_Pi416573500  | OR10A3      | 1.9538              | 2.0697   | 1.6605   | 1.1849   | 1.0049   | 1.8891   | 2.1596             | 3.4173   | 1.9144   | 0.7432   | 1.4329   | 1.7352   | 1.7300          | 1.9108   | 1.4423   | 1.3608   | 0.8005   | 2.1745   | 1.8191          | 2.7749   | 2.5147   | 1.2280   | 1.6761   | 3.4874   |
| CUST_265_Pi416379584  | OR10A3      | 2.4745              | 2.3140   | 1.9774   | 1.0168   | 1.7948   | 1.8006   | 2.5386             | 3.1114   | 1.8306   | 3.3289   | 1.5999   | 1.6925   | 1.7717          | 1.8331   | 1.4988   | 1.2515   | 1.0148   | 2.5091   | 1.9777          | 3.0479   | 2.0774   | 1.0198   | 1.2603   | 3.7807   |
| A_23_P75867           | OR10A4      | 1.7871              | 2.1960   | 2.3284   | 1.2930   | 2.7208   | 2.0076   | 1.8333             | 1.7527   | 2.1999   | 1.0482   | 1.9380   | 1.9806   | 1.7140          | 2.0244   | 2.1192   | 1.3078   | 1.4678   | 1.7719   | 1.7296          | 2.1002   | 1.5140   | 1.3297   | 3.0150   | 1.5986   |
| CUST_1625_Pi416261804 | OR10A4      | 3.9833              | 4.3215   | 4.2031   | 3.0999   | 4.7991   | 2.7182   | 3.6604             | 4.5419   | 4.5306   | 4.6296   | 3.4615   | 2.9578   | 2.7539          | 3.2446   | 3.4681   | 3.3669   | 3.9102   | 2.5990   | 3.3603          | 3.8609   | 4.2195   | 3.5389   | 5.3606   | 3.9571   |
| A_23_P315991          | OR10A5      | 5.7241              | 5.7020   | 5.7528   | 5.0732   | 6.5916   | 4.5980   | 5.9704             | 5.0741   | 5.8601   | 6.1881   | 6.0454   | 1.7680   | 3.2613          | 4.8323   | 4.6663   | 3.5945   | 5.2396   | 2.1455   | 6.2123          | 4.9353   | 5.1452   | 5.0982   | 7.8475   | 3.8681   |
| CUST_1211_Pi416261804 | OR10A5      | 4.4203              | 2.1254   | 4.1241   | 1.8768   | 5.1368   | 1.7103   | 3.8773             | 5.1700   | 4.0683   | 4.1705   | 4.0550   | 1.5444   | 3.5955          | 3.9298   | 3.6347   | 1.8136   | 3.7490   | 1.5967   | 3.8058          | 2.5935   | 4.7528   | 2.4142   | 5.1313   | 2.2178   |
| CUST_221_Pi416573500  | OR10A6      | 2.1549              | 2.0940   | 1.7216   | 1.1484   | 0.9650   | 1.7965   | 2.2617             | 1.7032   | 1.6698   | 2.1108   | 1.5688   | 1.7327   | 1.7677          | 1.8611   | 1.6602   | 1.2280   | 0.9894   | 1.5905   | 1.8728          | 1.9531   | 2.2658   | 1.1627   | 1.2425   | 1.7548   |
| CUST_227_Pi416379584  | OR10A6      | 2.0886              | 2.2037   | 2.9634   | 1.6366   | 1.8258   | 2.4413   | 2.1594             | 1.7651   | 2.6843   | 1.4116   | 1.6552   | 2.0205   | 1.9051          | 2.2045   | 2.7280   | 1.6046   | 2.1108   | 1.8579   | 1.9557          | 1.9796   | 1.7852   | 1.8158   | 3.0996   | 1.7195   |
| CUST_304_Pi416573500  | OR10A7      | 1.7621              | 1.9975   | 1.6539   | 1.1831   | 1.0695   | 1.8054   | 1.9527             | 1.5857   | 1.5117   | 0.7432   | 1.4101   | 1.7573   | 1.7033          | 1.8728   | 1.6994   | 1.3302   | 0.9004   | 1.5420   | 1.6931          | 1.8549   | 1.9184   | 1.1908   | 2.6190   | 1.4944   |
| CUST_312_Pi416379584  | OR10A7      | 1.9782              | 2.0743   | 1.8713   | 0.9163   | 0.8064   | 1.5099   | 2.3828             | 2.4300   | 2.1811   | 1.0889   | 1.6286   | 2.3191   | 1.7039          | 2.8590   | 1.4586   | 1.1193   | 0.8599   | 1.4656   | 1.7789          | 1.7182   | 3.7529   | 1.2358   | 0.9364   | 1.8360   |
| CUST_203_Pi416573500  | OR10AD1     | 1.7651              | 2.0795   | 1.6190   | 1.1350   | 1.0679   | 2.3668   | 1.9505             | 1.6475   | 1.6652   | 1.7765   | 1.4548   | 1.8182   | 1.6955          | 1.9347   | 1.6186   | 1.3105   | 0.9442   | 1.5756   | 1.6659          | 1.9157   | 1.9043   | 1.1326   | 1.3783   | 1.5160   |
| CUST_208_Pi416379584  | OR10AD1     | 1.9232              | 4.1527   | 2.4348   | 1.4609   | 2.5453   | 1.9991   | 2.0648             | 2.3926   | 2.2936   | 0.8985   | 1.7027   | 1.9108   | 1.7649          | 1.9861   | 1.6954   | 1.2765   | 0.8299   | 1.9912   | 1.8238          | 2.2516   | 2.3982   | 1.3337   | 1.8575   | 1.9690   |
| CUST_288_Pi416573500  | OR10AG1     | 2.7900              | 2.8696   | 3.3038   | 1.6083   | 1.5717   | 2.1028   | 2.8969             | 2.3310   | 3.3258   | 1.6723   | 1.5389   | 1.8813   | 2.2767          | 2.6270   | 3.3399   | 1.5371   | 0.9982   | 1.8595   | 2.3920          | 1.9803   | 1.6149   | 1.4752   | 2.1015   | 2.9170   |
| CUST_296_Pi416379584  | OR10AG1     | 2.8351              | 3.6881   | 1.8432   | 1.5911   | 1.1302   | 2.1070   | 1.9258             | 2.4936   | 1.5485   | 0.7432   | 1.6078   | 2.5778   | 1.6457          | 3.7281   | 1.5635   | 1.5012   | 0.9488   | 1.5674   | 1.6657          | 2.5084   | 2.6132   | 1.3811   | 1.5901   | 1.5604   |
| A_24_P60680           | OR10C1      | 2.9738              | 2.0476   | 4.0548   | 3.1135   | 4.5090   | 1.9246   | 3.5584             | 3.6678   | 4.3158   | 3.3982   | 3.5008   | 1.7378   | 2.4507          | 2.4440   | 4.1375   | 1.1019   | 3.7736   | 2.4065   | 3.6529          | 1.8487   | 3.7151   | 3.2910   | 3.9083   | 2.3801   |
| CUST_1194_Pi416261804 | OR10C1      | 7.8221              | 6.6750   | 8.0067   | 7.1350   | 8.1748   | 7.1009   | 7.2742             | 6.7580   | 8.1611   | 7.4630   | 6.7702   | 7.0841   | 6.1223          | 7.2772   | 8.6037   | 6.1133   | 6.7450   | 6.7958   | 7.5103          | 6.7499   | 7.8158   | 7.8031   | 7.3892   | 6.8651   |
| CUST_398_Pi416573500  | OR10G2      | 2.5036              | 2.2987   | 3.4773   | 2.7982   | 4.4559   | 2.4314   | 2.7449             | 3.4020   | 3.8467   | 3.8079   | 3.0175   | 2.0657   | 3.0197          | 2.2225   | 3.7804   | 1.6117   | 3.5408   | 2.0111   | 3.6072          | 1.9891   | 3.6259   | 1.8586   | 4.2543   | 1.9514   |

|                            |        |        |        |        |        |        |        |        |        |        |        |        |        |        |        |        |        |        |        |        |        |        |        |        |        |
|----------------------------|--------|--------|--------|--------|--------|--------|--------|--------|--------|--------|--------|--------|--------|--------|--------|--------|--------|--------|--------|--------|--------|--------|--------|--------|--------|
| CUST_407_P14<br>16379584   | OR10G2 | 5.0795 | 3.4256 | 6.1022 | 4.5224 | 5.9609 | 4.9950 | 4.7013 | 4.7482 | 5.6896 | 4.9199 | 4.5980 | 5.2314 | 2.2150 | 4.4228 | 6.2893 | 0.9717 | 4.8009 | 4.0777 | 4.6334 | 3.8273 | 5.7982 | 5.0139 | 5.0678 | 4.0246 |
| CUST_332_P14<br>16573500   | OR10G3 | 3.4455 | 2.1740 | 3.2113 | 1.6816 | 2.4513 | 1.7583 | 3.5846 | 1.4801 | 3.0219 | 1.3763 | 1.8403 | 1.7107 | 2.9383 | 2.9640 | 1.7814 | 1.2580 | 1.4821 | 1.9191 | 3.2606 | 3.7129 | 3.8941 | 3.2984 | 3.1207 | 3.4890 |
| CUST_341_P14<br>16379584   | OR10G3 | 1.6770 | 1.9353 | 2.2917 | 1.1697 | 2.7461 | 1.8040 | 1.7072 | 1.5694 | 2.2271 | 0.7432 | 1.3709 | 1.6859 | 1.6020 | 1.8492 | 1.6744 | 1.1446 | 1.4609 | 1.4820 | 1.5790 | 1.7488 | 1.8299 | 1.1748 | 1.0385 | 1.4584 |
| CUST_313_P14<br>16573500   | OR10G4 | 1.5594 | 1.7083 | 1.9236 | 0.8272 | 1.6267 | 1.4243 | 1.8371 | 1.9113 | 1.9859 | 0.7432 | 1.1563 | 1.4918 | 1.6835 | 1.5479 | 1.6513 | 1.0804 | 0.9341 | 1.4197 | 1.6097 | 1.5862 | 2.2431 | 0.7432 | 1.3066 | 1.4776 |
| CUST_321_P14<br>16379584   | OR10G4 | 1.6346 | 2.2212 | 2.1140 | 2.1122 | 1.0587 | 1.8857 | 1.8023 | 2.9005 | 2.4591 | 0.7432 | 1.5069 | 1.7205 | 1.5603 | 3.2633 | 1.4690 | 1.4218 | 0.8956 | 2.2886 | 1.5699 | 3.3293 | 2.5531 | 2.7579 | 0.9342 | 2.1448 |
| CUST_154_P14<br>16573500   | OR10G7 | 1.8864 | 1.8775 | 1.6530 | 0.9210 | 0.8656 | 1.4818 | 2.2563 | 2.5068 | 2.1956 | 1.3296 | 1.7937 | 1.6396 | 1.8458 | 1.7789 | 1.7495 | 1.2640 | 3.2801 | 1.5460 | 1.7398 | 1.7327 | 2.4475 | 0.9026 | 0.9297 | 1.7204 |
| CUST_159_P14<br>16379584   | OR10G7 | 2.0848 | 2.0522 | 1.6235 | 1.0975 | 1.2283 | 1.7228 | 2.3837 | 1.6965 | 1.7473 | 2.0124 | 2.3981 | 1.6106 | 1.7870 | 1.7974 | 1.5058 | 1.2687 | 1.0047 | 1.6063 | 1.8693 | 1.8522 | 2.2037 | 1.0600 | 1.2731 | 1.7824 |
| A_23_P125204               | OR10G8 | 4.2808 | 3.4388 | 4.0032 | 0.9461 | 4.9411 | 2.2582 | 3.7294 | 4.5429 | 4.7232 | 2.7788 | 2.8574 | 1.4692 | 2.4629 | 2.5428 | 3.5313 | 1.2165 | 3.1590 | 1.8665 | 4.0293 | 3.2862 | 3.9872 | 1.9965 | 5.0881 | 2.6395 |
| CUST_1990_P1<br>416261804  | OR10G8 | 1.9360 | 2.1521 | 2.8082 | 1.2407 | 1.3789 | 1.9178 | 2.1703 | 2.7338 | 2.6825 | 0.7432 | 1.5802 | 1.8968 | 1.8674 | 1.9781 | 1.8881 | 2.1486 | 1.2759 | 1.7660 | 1.8659 | 2.1171 | 2.6408 | 1.2440 | 2.1142 | 1.7639 |
| CUST_385_P14<br>16573500   | OR10G9 | 1.8593 | 1.9182 | 1.6407 | 1.1367 | 1.1225 | 1.7185 | 2.0827 | 1.5036 | 1.5784 | 1.2478 | 1.4517 | 1.7896 | 1.8484 | 1.8967 | 1.7411 | 1.4014 | 2.0215 | 1.9303 | 1.7711 | 1.8046 | 1.5608 | 1.1229 | 1.6820 | 1.5655 |
| CUST_394_P14<br>16379584   | OR10G9 | 2.1831 | 2.5196 | 2.4206 | 1.4919 | 0.7777 | 3.2460 | 2.2269 | 1.6837 | 2.4115 | 0.7432 | 2.9293 | 2.5223 | 1.6727 | 2.1702 | 1.4549 | 1.0359 | 0.7279 | 2.3267 | 2.6086 | 2.6381 | 3.1755 | 1.9227 | 1.3731 | 3.8868 |
| A_23_P27917                | OR10H1 | 2.1870 | 1.8041 | 3.1952 | 1.0245 | 4.0086 | 1.7057 | 2.5833 | 1.4467 | 2.6312 | 2.5861 | 3.5599 | 1.6532 | 2.0237 | 1.6965 | 2.3211 | 1.0483 | 1.7650 | 1.6763 | 2.0492 | 1.5585 | 3.1693 | 2.2069 | 2.8514 | 1.8684 |
| CUST_843_P14<br>16261804   | OR10H1 | 1.6549 | 1.9711 | 1.8064 | 0.9859 | 2.1243 | 1.5883 | 1.9065 | 2.1597 | 2.3641 | 0.7432 | 1.4249 | 2.0438 | 1.6258 | 2.2295 | 1.6784 | 1.2222 | 0.9586 | 1.6962 | 1.5450 | 1.7806 | 2.8536 | 0.9621 | 3.4873 | 1.4754 |
| A_23_P50799                | OR10H2 | 9.4788 | 7.7976 | 9.4089 | 8.4316 | 8.8851 | 7.6371 | 9.6101 | 8.1932 | 9.4921 | 9.1334 | 8.0877 | 7.9489 | 7.1886 | 8.1610 | 9.8696 | 7.3120 | 8.0378 | 7.3965 | 8.9893 | 7.5842 | 8.9216 | 8.7097 | 8.4882 | 7.3709 |
| CUST_836_P14<br>16261804   | OR10H2 | 6.0303 | 6.4340 | 7.6023 | 6.9921 | 7.0544 | 4.8936 | 5.0596 | 6.9958 | 7.6568 | 7.6415 | 5.9536 | 6.3860 | 4.9102 | 6.5231 | 7.8714 | 5.1844 | 6.2858 | 6.0201 | 6.0275 | 5.7183 | 7.4492 | 7.1235 | 6.6405 | 5.3354 |
| A_23_P39410                | OR10H3 | 1.7762 | 2.4846 | 2.1303 | 1.5008 | 3.0460 | 2.1336 | 1.7923 | 1.8534 | 4.0357 | 0.7432 | 2.9958 | 2.1073 | 1.7237 | 2.1893 | 1.9813 | 1.5281 | 1.3661 | 1.7259 | 1.6521 | 2.2287 | 2.5709 | 1.4473 | 2.4293 | 1.5582 |
| CUST_1652_P1<br>416261804  | OR10H3 | 2.8060 | 3.5887 | 1.5159 | 1.1108 | 2.5392 | 1.7818 | 2.5238 | 2.4139 | 2.1721 | 2.2956 | 1.9953 | 1.9047 | 1.8386 | 1.8504 | 1.5817 | 0.9997 | 2.1558 | 2.0933 | 2.2147 | 2.8162 | 3.0815 | 2.1739 | 2.0943 | 2.1662 |
| A_23_P5258                 | OR10H4 | 1.9848 | 2.0587 | 2.4595 | 1.4395 | 3.5166 | 1.7610 | 2.3598 | 1.6721 | 2.5333 | 2.7237 | 2.6408 | 1.7277 | 2.2565 | 1.9018 | 1.7527 | 1.2707 | 2.0340 | 1.5290 | 1.8322 | 1.8919 | 2.5498 | 1.1573 | 2.3811 | 1.6634 |
| CUST_758_P14<br>16261804   | OR10H5 | 4.1665 | 4.8164 | 5.7782 | 5.2531 | 5.5942 | 4.2804 | 5.7060 | 4.6465 | 5.7957 | 5.4565 | 4.8070 | 5.0209 | 4.6399 | 4.9383 | 6.0661 | 4.5908 | 5.2780 | 4.6893 | 5.2187 | 4.2755 | 5.1677 | 5.6210 | 5.3071 | 5.1642 |
| A_23_P397468               | OR10J1 | 1.8373 | 2.2710 | 2.0799 | 1.2097 | 1.9947 | 1.9599 | 1.9520 | 1.8108 | 1.8501 | 1.2872 | 1.7364 | 1.9923 | 1.7573 | 2.0302 | 1.8195 | 1.3516 | 2.9416 | 1.7823 | 1.7720 | 2.2127 | 1.5406 | 1.2146 | 2.0799 | 1.6780 |
| CUST_10854_P<br>I416261804 | OR10J1 | 1.7962 | 2.3242 | 1.7483 | 1.2650 | 1.3158 | 2.0802 | 1.8545 | 1.8325 | 1.6773 | 0.8755 | 1.7069 | 2.0495 | 1.7608 | 2.1133 | 2.0232 | 1.3347 | 1.2133 | 1.8624 | 1.7503 | 2.2610 | 1.5992 | 1.2941 | 1.4239 | 1.6698 |
| A_32_P385645               | OR10J3 | 1.6520 | 2.0502 | 2.7286 | 1.5730 | 2.7644 | 2.0089 | 1.4934 | 2.0480 | 2.7449 | 3.0151 | 2.0795 | 1.8488 | 1.8313 | 1.9916 | 2.8768 | 1.2688 | 2.1487 | 1.6192 | 1.6945 | 1.8615 | 1.4709 | 1.4173 | 2.0783 | 2.4176 |
| CUST_15805_P<br>I416261804 | OR10J3 | 2.0465 | 2.2468 | 1.6334 | 4.2040 | 0.9254 | 2.0405 | 3.0224 | 1.8277 | 1.5760 | 0.7432 | 1.6630 | 1.7964 | 1.7581 | 1.9622 | 1.6071 | 1.3112 | 0.8878 | 1.8721 | 1.8402 | 1.9769 | 1.5006 | 1.2983 | 1.2709 | 1.7131 |

|                            |        |        |        |        |        |        |        |        |        |        |        |        |        |        |        |        |        |        |        |        |        |        |        |        |        |
|----------------------------|--------|--------|--------|--------|--------|--------|--------|--------|--------|--------|--------|--------|--------|--------|--------|--------|--------|--------|--------|--------|--------|--------|--------|--------|--------|
| A_23_P126031               | OR10J5 | 2.2030 | 2.0476 | 2.0497 | 1.1981 | 2.2249 | 1.8782 | 2.0270 | 1.5817 | 2.1226 | 1.3490 | 1.7132 | 1.8495 | 2.0940 | 1.9124 | 1.8069 | 1.2003 | 0.8589 | 1.6491 | 1.7564 | 1.9124 | 1.9815 | 1.2298 | 3.3094 | 1.6550 |
| CUST_11004_P<br>I416261804 | OR10J5 | 2.5279 | 2.2368 | 2.3763 | 1.2028 | 2.1681 | 1.8288 | 2.9865 | 1.8638 | 2.5128 | 0.7432 | 1.6828 | 2.7336 | 1.9626 | 1.9787 | 1.5383 | 1.7080 | 1.2381 | 2.2248 | 2.9481 | 3.1404 | 3.0660 | 2.7023 | 1.1145 | 2.6692 |
| CUST_228_Pi4<br>16573500   | OR10K1 | 2.3463 | 2.1069 | 3.9137 | 3.4963 | 3.8986 | 2.2601 | 2.6058 | 2.2209 | 3.8318 | 3.6706 | 3.5011 | 1.9371 | 2.4488 | 2.0881 | 4.0995 | 2.3990 | 2.8595 | 1.8900 | 2.3465 | 2.4380 | 3.5258 | 3.5568 | 4.4931 | 1.8189 |
| CUST_235_Pi4<br>16379584   | OR10K1 | 2.1395 | 1.9782 | 1.4530 | 0.9903 | 0.8645 | 2.7724 | 3.1613 | 2.8469 | 1.4286 | 0.7432 | 1.2048 | 1.4973 | 1.7650 | 3.5116 | 1.4182 | 1.1480 | 0.7166 | 1.6898 | 2.2644 | 1.7368 | 1.4480 | 2.0916 | 0.9202 | 2.6464 |
| CUST_229_Pi4<br>16573500   | OR10K2 | 1.9569 | 2.2927 | 6.1027 | 1.3967 | 0.9622 | 2.1041 | 2.0229 | 1.6817 | 1.6909 | 0.7432 | 1.7183 | 1.9624 | 1.8316 | 2.0594 | 1.8046 | 1.3766 | 1.0262 | 1.7512 | 1.8139 | 2.0062 | 1.6488 | 1.4139 | 1.3835 | 1.7064 |
| CUST_236_Pi4<br>16379584   | OR10K2 | 1.6962 | 2.0713 | 1.5189 | 2.0834 | 0.9465 | 4.5374 | 1.9480 | 2.0296 | 1.4394 | 0.7432 | 1.3228 | 1.7643 | 2.0610 | 1.9048 | 1.4720 | 1.2146 | 1.6995 | 2.0726 | 1.6428 | 1.8588 | 1.4196 | 1.2429 | 1.0212 | 1.4956 |
| A_24_P167377               | OR10P1 | 3.2244 | 3.1947 | 4.1272 | 3.7928 | 5.0960 | 3.0766 | 3.6904 | 4.0917 | 4.4263 | 3.6728 | 3.2904 | 3.3705 | 2.8435 | 4.2097 | 3.6861 | 4.2567 | 4.2257 | 2.0541 | 3.3354 | 2.0717 | 3.8659 | 3.9304 | 4.7904 | 2.5685 |
| CUST_1722_Pi<br>416261804  | OR10P1 | 1.6186 | 2.0051 | 1.9694 | 1.1369 | 2.6632 | 1.7170 | 1.6548 | 1.5981 | 2.4215 | 0.7432 | 1.5329 | 1.8527 | 1.7079 | 1.9908 | 1.9126 | 1.3179 | 1.2584 | 1.6521 | 1.5717 | 1.8423 | 2.2370 | 1.1411 | 2.5334 | 1.4551 |
| CUST_318_Pi4<br>16573500   | OR10Q1 | 5.5381 | 1.6170 | 4.6782 | 3.4601 | 4.1861 | 3.2906 | 5.3983 | 1.1493 | 4.2830 | 3.2982 | 2.2840 | 3.9417 | 3.0413 | 1.5872 | 4.1668 | 4.1121 | 3.7836 | 2.8602 | 5.0215 | 1.9920 | 4.5587 | 1.0434 | 3.3679 | 3.7649 |
| CUST_327_Pi4<br>16379584   | OR10Q1 | 1.9217 | 2.2194 | 1.6783 | 1.2750 | 1.0612 | 1.9282 | 2.0668 | 1.7323 | 1.6236 | 0.7432 | 1.7014 | 1.8344 | 2.3648 | 1.9812 | 1.7186 | 1.3263 | 1.1399 | 1.6398 | 1.7669 | 2.0392 | 2.1774 | 1.2737 | 1.3124 | 1.6681 |
| A_23_P705                  | OR10R2 | 1.7732 | 2.2395 | 1.6335 | 1.2659 | 1.2034 | 2.0541 | 1.8168 | 1.8165 | 1.5654 | 0.8656 | 1.6701 | 1.9265 | 1.6651 | 2.0075 | 1.7306 | 1.2909 | 1.0084 | 1.7029 | 1.6996 | 2.1110 | 1.4474 | 1.3221 | 1.2820 | 1.5762 |
| CUST_2013_Pi<br>416261804  | OR10R2 | 1.8318 | 2.2271 | 1.8465 | 1.3102 | 2.8341 | 2.0754 | 1.8861 | 1.7740 | 2.4093 | 0.8787 | 1.6685 | 1.9978 | 1.7316 | 2.0417 | 1.8177 | 1.3003 | 1.2676 | 1.8102 | 1.7605 | 2.1238 | 1.5264 | 1.3784 | 3.5060 | 1.6442 |
| CUST_319_Pi4<br>16573500   | OR10S1 | 2.1663 | 2.0666 | 2.3769 | 1.7517 | 2.7872 | 2.1697 | 2.6018 | 1.7998 | 2.2286 | 1.3058 | 1.6949 | 3.3325 | 1.9295 | 4.5967 | 1.7096 | 1.5321 | 1.4728 | 1.6143 | 4.4831 | 1.9071 | 2.9675 | 0.9701 | 3.4613 | 2.9394 |
| CUST_328_Pi4<br>16379584   | OR10S1 | 1.8539 | 2.0956 | 1.6795 | 1.2814 | 0.9188 | 1.9085 | 1.9963 | 1.6761 | 2.0554 | 0.7432 | 1.6014 | 1.7865 | 1.7512 | 1.9604 | 1.7305 | 1.2783 | 1.0477 | 1.6178 | 1.7252 | 1.9317 | 1.5319 | 1.2795 | 1.2796 | 1.5982 |
| A_23_P23507                | OR10T2 | 1.6989 | 2.0167 | 2.4029 | 1.1436 | 1.2428 | 1.8555 | 1.7429 | 1.6369 | 1.5207 | 0.9113 | 1.4066 | 1.7033 | 1.6020 | 1.8282 | 1.6314 | 3.6672 | 0.7960 | 1.5363 | 1.6310 | 1.8597 | 1.4275 | 1.2071 | 1.0857 | 1.4983 |
| CUST_2268_Pi<br>416261804  | OR10T2 | 2.6011 | 1.9148 | 2.4127 | 0.9660 | 1.3523 | 1.5860 | 2.6312 | 1.5757 | 2.5942 | 1.5771 | 1.3521 | 1.5777 | 1.8413 | 1.7133 | 1.5228 | 1.2917 | 0.8990 | 1.5307 | 2.0116 | 1.7727 | 2.7708 | 0.9708 | 3.0497 | 1.8741 |
| CUST_223_Pi4<br>16573500   | OR10V1 | 4.5438 | 2.8113 | 5.4469 | 5.1079 | 6.1771 | 4.8370 | 5.5861 | 5.0220 | 5.6395 | 5.2880 | 5.9879 | 4.7372 | 3.8481 | 5.2199 | 5.1715 | 4.7223 | 5.6004 | 3.9606 | 4.8400 | 4.0062 | 4.9014 | 4.9138 | 6.3583 | 5.3294 |
| CUST_229_Pi4<br>16379584   | OR10V1 | 2.1137 | 3.4565 | 1.8584 | 1.3408 | 0.8969 | 1.9013 | 2.3664 | 1.7745 | 1.5032 | 2.1089 | 1.5963 | 1.8706 | 1.7589 | 2.1400 | 1.4917 | 1.2681 | 0.9387 | 2.9331 | 1.9719 | 1.9325 | 2.3621 | 1.4887 | 1.2072 | 2.6408 |
| CUST_294_Pi4<br>16573500   | OR10W1 | 1.9503 | 2.2037 | 3.4755 | 1.5908 | 3.1367 | 2.1473 | 2.0793 | 2.6989 | 3.2705 | 3.1789 | 2.6909 | 2.0047 | 1.9069 | 2.1487 | 1.9325 | 1.6007 | 3.0979 | 1.8461 | 1.9524 | 2.0310 | 2.6811 | 1.5513 | 3.9625 | 1.7828 |
| CUST_302_Pi4<br>16379584   | OR10W1 | 1.6412 | 1.9692 | 1.4843 | 1.0982 | 0.9159 | 1.8564 | 1.6643 | 1.5545 | 1.4234 | 0.7432 | 1.2775 | 1.7046 | 1.5303 | 1.7750 | 1.7104 | 1.1312 | 1.3505 | 1.4676 | 1.5919 | 1.8098 | 1.3723 | 1.1464 | 0.9336 | 1.4420 |
| CUST_439_Pi4<br>16573500   | OR10X1 | 1.6650 | 1.9897 | 1.5521 | 1.1352 | 1.0176 | 1.8299 | 1.6840 | 1.5667 | 1.4984 | 0.7432 | 1.3948 | 1.7945 | 1.6029 | 1.8539 | 1.6804 | 1.1919 | 0.8573 | 1.5537 | 1.6181 | 1.8711 | 1.4352 | 1.1657 | 1.0369 | 1.4729 |
| CUST_448_Pi4<br>16379584   | OR10X1 | 2.0779 | 2.1316 | 2.1805 | 1.1303 | 1.7685 | 2.2988 | 2.3353 | 1.7250 | 1.4820 | 0.7432 | 1.5214 | 1.6111 | 1.7616 | 1.8325 | 1.4458 | 1.1884 | 0.9011 | 1.5305 | 1.8526 | 1.8912 | 2.5444 | 2.1234 | 1.2089 | 2.3045 |
| CUST_456_Pi4<br>16573500   | OR10Z1 | 1.6400 | 1.9606 | 1.5343 | 1.0988 | 0.9087 | 1.7366 | 1.6723 | 1.5445 | 1.5474 | 0.7432 | 1.3953 | 1.7117 | 1.6013 | 1.7974 | 1.7149 | 1.1403 | 0.9007 | 1.5203 | 1.5932 | 1.8304 | 1.4534 | 1.1149 | 1.0221 | 1.4692 |
| CUST_465_Pi4<br>16379584   | OR10Z1 | 2.7906 | 1.8682 | 2.0850 | 0.8823 | 0.8166 | 1.4811 | 2.1395 | 1.5302 | 1.6809 | 0.7432 | 1.3756 | 1.5280 | 1.7040 | 1.5973 | 1.9846 | 1.1223 | 0.9465 | 1.4356 | 1.7211 | 1.7548 | 1.9941 | 0.8293 | 0.9735 | 2.5923 |

|                           |         |        |        |        |        |        |        |        |        |        |        |        |        |        |        |        |        |        |        |        |        |        |        |        |        |
|---------------------------|---------|--------|--------|--------|--------|--------|--------|--------|--------|--------|--------|--------|--------|--------|--------|--------|--------|--------|--------|--------|--------|--------|--------|--------|--------|
| A_23_P59099               | OR11A1  | 5.8918 | 2.9700 | 6.7247 | 5.8447 | 7.0044 | 4.6692 | 6.4299 | 5.8567 | 6.6374 | 6.3409 | 5.9028 | 4.4311 | 4.5797 | 5.5027 | 6.8817 | 5.2414 | 5.6784 | 4.3584 | 6.0142 | 4.3807 | 6.1714 | 5.9435 | 6.4509 | 5.2108 |
| CUST_1360_PI<br>416261804 | OR11A1  | 1.7023 | 2.1580 | 1.5582 | 2.6299 | 1.1037 | 2.0242 | 1.7290 | 1.6946 | 1.4654 | 0.7432 | 1.3828 | 1.8208 | 1.5799 | 1.9620 | 1.5189 | 1.2482 | 0.6991 | 1.5480 | 1.6427 | 1.9521 | 2.0792 | 1.2804 | 1.0642 | 1.4528 |
| A_23_P37231               | OR11G2  | 1.8175 | 2.2380 | 1.7251 | 1.3358 | 1.0727 | 1.9953 | 1.8832 | 1.7438 | 1.7065 | 0.7432 | 1.7136 | 1.9217 | 1.7499 | 2.0292 | 1.8045 | 6.1705 | 1.1459 | 1.7474 | 1.7291 | 2.0901 | 1.5804 | 1.3752 | 1.3543 | 1.6155 |
| CUST_2155_PI<br>416261804 | OR11G2  | 1.6672 | 2.0680 | 1.6721 | 1.1789 | 1.6733 | 1.8103 | 1.7419 | 1.7362 | 1.5873 | 0.7432 | 1.5479 | 1.8540 | 1.6663 | 1.9770 | 1.7719 | 1.2685 | 1.1523 | 1.6366 | 1.5981 | 1.8767 | 1.4440 | 1.1875 | 1.0641 | 1.4991 |
| CUST_2185_PI<br>416261804 | OR11H1  | 1.7722 | 2.1248 | 1.6415 | 1.1946 | 1.1678 | 2.4216 | 1.8771 | 1.6895 | 1.5844 | 0.7432 | 1.5588 | 1.9051 | 1.7203 | 1.9712 | 1.7619 | 1.2714 | 2.4215 | 1.7053 | 1.7064 | 2.0333 | 1.4890 | 1.2310 | 1.8901 | 1.6006 |
| A_23_P128868              | OR11H12 | 3.5491 | 1.9458 | 3.8528 | 2.6528 | 2.7311 | 2.8094 | 3.3809 | 2.1124 | 3.3742 | 0.7432 | 1.2964 | 1.6075 | 2.2449 | 1.7044 | 3.9195 | 5.7792 | 0.7903 | 2.3718 | 3.0284 | 1.8257 | 3.5109 | 0.9408 | 2.7205 | 3.7143 |
| CUST_8751_PI<br>416261804 | OR11H12 | 7.8178 | 6.8031 | 6.9693 | 5.0993 | 7.4488 | 6.7297 | 7.8078 | 6.7516 | 6.8804 | 6.1662 | 6.5908 | 5.6878 | 5.6831 | 6.8796 | 6.8075 | 4.3401 | 6.2477 | 5.6695 | 7.5822 | 6.4059 | 6.4673 | 5.2437 | 7.6274 | 5.6294 |
| CUST_231_PI4<br>16573500  | OR11H4  | 2.0081 | 2.0766 | 3.3005 | 1.1550 | 2.7226 | 2.5636 | 2.2301 | 1.6487 | 2.9086 | 2.3755 | 2.9080 | 1.8570 | 1.7916 | 1.9157 | 2.3923 | 1.2411 | 2.2801 | 1.7023 | 1.8716 | 1.9880 | 2.7367 | 1.1964 | 3.1392 | 1.7590 |
| CUST_238_PI4<br>16379584  | OR11H4  | 1.6460 | 1.9729 | 1.4836 | 1.1183 | 0.7450 | 3.7963 | 1.6908 | 1.5996 | 1.4797 | 0.7432 | 1.3495 | 1.7120 | 1.5866 | 1.8159 | 1.6031 | 1.0962 | 0.7829 | 1.4746 | 1.5747 | 1.7242 | 2.2617 | 1.1131 | 0.9803 | 1.4511 |
| CUST_323_PI4<br>16573500  | OR11H6  | 2.4855 | 2.0689 | 2.4808 | 1.4231 | 2.9282 | 2.1302 | 2.3080 | 1.7388 | 2.6067 | 3.8569 | 2.5588 | 1.8628 | 1.8946 | 2.0406 | 2.8956 | 1.4802 | 1.8591 | 1.7611 | 1.9851 | 2.5531 | 2.4772 | 3.4786 | 2.6976 | 1.7072 |
| CUST_332_PI4<br>16379584  | OR11H6  | 2.1759 | 2.0829 | 1.7955 | 1.9882 | 0.8317 | 2.1610 | 2.0147 | 3.1700 | 1.6555 | 2.5584 | 1.1871 | 1.9205 | 1.5894 | 2.6856 | 1.4938 | 1.0753 | 0.7112 | 2.6474 | 1.5966 | 2.2669 | 2.4052 | 2.1798 | 1.7081 | 3.2585 |
| CUST_388_PI4<br>16573500  | OR11L1  | 1.9841 | 2.1710 | 1.8689 | 1.4343 | 2.0658 | 2.0627 | 2.1708 | 1.7760 | 2.5479 | 0.7432 | 1.6280 | 1.9247 | 1.8167 | 2.0977 | 2.4399 | 1.6480 | 3.4983 | 1.6935 | 1.8777 | 2.0138 | 1.9808 | 1.4587 | 2.6831 | 1.6089 |
| CUST_397_PI4<br>16379584  | OR11L1  | 1.9970 | 2.3207 | 1.8746 | 1.0218 | 1.0127 | 3.2361 | 2.7545 | 1.8074 | 1.7257 | 0.7432 | 1.9956 | 1.7970 | 1.7214 | 1.8522 | 1.5317 | 1.2508 | 1.0582 | 1.6433 | 1.8145 | 2.1815 | 2.8341 | 2.2201 | 1.1643 | 1.8133 |
| A_23_P93295               | OR12D2  | 1.7355 | 2.0706 | 1.6172 | 1.2129 | 0.9597 | 1.8487 | 1.8775 | 1.7283 | 1.6210 | 0.7432 | 1.5472 | 1.8580 | 1.6793 | 2.0018 | 1.7684 | 1.2956 | 1.0527 | 1.6657 | 1.6239 | 1.8830 | 1.5970 | 1.2543 | 1.6039 | 1.5050 |
| CUST_4660_PI<br>416261804 | OR12D2  | 1.9869 | 2.2131 | 1.7248 | 2.1365 | 1.2564 | 2.6922 | 2.1115 | 3.2562 | 1.6151 | 0.9897 | 1.5964 | 1.9286 | 1.8315 | 2.5518 | 1.6841 | 1.5769 | 0.9011 | 1.9755 | 1.8189 | 2.0026 | 1.7551 | 2.1903 | 1.1647 | 2.4973 |
| A_23_P259555              | OR12D3  | 1.6743 | 1.8102 | 1.6421 | 0.9236 | 0.8892 | 1.5729 | 1.9171 | 1.4679 | 1.5165 | 0.7432 | 1.2299 | 1.5415 | 1.6430 | 1.6242 | 1.5149 | 1.1771 | 0.8214 | 1.4413 | 1.5989 | 1.6771 | 1.3812 | 0.9358 | 0.8345 | 1.4666 |
| CUST_1925_PI<br>416261804 | OR12D3  | 1.9245 | 2.2897 | 1.7825 | 1.6068 | 1.3794 | 2.3059 | 2.0270 | 1.8852 | 1.6839 | 0.8834 | 1.7253 | 2.0039 | 1.7312 | 2.1597 | 1.7825 | 1.7271 | 0.9688 | 1.6724 | 1.8146 | 2.1165 | 1.5792 | 1.5865 | 1.2264 | 1.5138 |
| CUST_413_PI4<br>16573500  | OR13A1  | 8.2324 | 7.9813 | 8.8178 | 8.2168 | 8.4808 | 8.4065 | 8.0031 | 7.6652 | 8.7238 | 8.4299 | 7.1848 | 8.2409 | 6.0425 | 7.7103 | 9.2034 | 7.0254 | 7.8380 | 7.9278 | 7.7097 | 7.3474 | 8.1597 | 8.5758 | 7.7697 | 7.9522 |
| CUST_422_PI4<br>16379584  | OR13A1  | 2.4787 | 3.9544 | 2.5664 | 2.5532 | 3.7407 | 2.5900 | 2.8462 | 4.9039 | 2.6303 | 2.7462 | 3.5069 | 1.6621 | 2.3068 | 3.4056 | 2.3726 | 3.1776 | 2.7216 | 2.1859 | 2.2342 | 3.7461 | 3.0494 | 1.4896 | 2.8525 | 2.6994 |
| CUST_166_PI4<br>16379584  | OR13C2  | 3.2667 | 2.6772 | 2.8948 | 3.1011 | 0.9908 | 3.7940 | 2.6763 | 3.4586 | 3.3211 | 3.6822 | 2.5480 | 3.3635 | 3.4998 | 3.9224 | 2.1848 | 1.4478 | 0.9930 | 3.4517 | 2.5985 | 3.4556 | 4.0057 | 3.5434 | 1.5756 | 3.2463 |
| CUST_367_PI4<br>16573500  | OR13C3  | 2.6146 | 2.3492 | 1.8380 | 1.5311 | 1.3233 | 2.2994 | 2.2413 | 1.9280 | 2.0696 | 0.8909 | 2.4445 | 2.0870 | 2.9201 | 2.9961 | 1.7769 | 1.6718 | 1.0397 | 1.7654 | 2.2291 | 2.1489 | 1.6567 | 1.6694 | 1.3217 | 1.7231 |
| CUST_376_PI4<br>16379584  | OR13C3  | 1.7201 | 3.6935 | 1.6258 | 1.3420 | 1.0350 | 1.9233 | 1.8362 | 1.6465 | 1.4368 | 2.3092 | 1.3689 | 3.6789 | 1.7204 | 1.8812 | 1.5799 | 2.4634 | 0.7321 | 1.6337 | 1.6102 | 1.9403 | 1.3758 | 1.2015 | 1.0176 | 1.5633 |

|                           |         |        |        |        |        |        |        |        |        |        |        |        |        |        |        |        |        |        |        |        |        |        |        |        |        |
|---------------------------|---------|--------|--------|--------|--------|--------|--------|--------|--------|--------|--------|--------|--------|--------|--------|--------|--------|--------|--------|--------|--------|--------|--------|--------|--------|
| A_23_P169207              | OR13C4  | 1.6656 | 1.7558 | 1.5209 | 0.8877 | 1.6241 | 1.5674 | 1.8945 | 1.4091 | 1.4019 | 1.6868 | 1.1031 | 1.5078 | 1.6044 | 1.5968 | 1.5427 | 0.9719 | 0.6916 | 1.4388 | 1.7435 | 1.5733 | 2.2343 | 0.9389 | 1.8227 | 1.4446 |
| CUST_1030_PI<br>416261804 | OR13C4  | 2.9664 | 3.2906 | 2.1665 | 3.8333 | 3.7009 | 2.1635 | 3.0944 | 3.8310 | 2.5320 | 3.7679 | 3.2412 | 1.8629 | 2.1022 | 2.4072 | 2.4363 | 1.1607 | 2.6385 | 1.8749 | 2.8287 | 2.3284 | 2.6293 | 4.2123 | 3.2404 | 3.8658 |
| CUST_161_PI4<br>16573500  | OR13C5  | 2.2335 | 2.1839 | 1.6668 | 1.3473 | 1.2315 | 1.9462 | 2.4974 | 2.9960 | 1.7506 | 0.7432 | 1.9633 | 2.5223 | 2.0908 | 2.4990 | 1.7109 | 1.4500 | 2.3494 | 1.7082 | 2.0114 | 1.9880 | 2.6518 | 1.3138 | 2.5506 | 2.4944 |
| CUST_239_PI4<br>16379584  | OR13C5  | 2.4233 | 4.7594 | 3.4489 | 4.4189 | 3.3064 | 4.5486 | 2.7371 | 4.0419 | 4.0300 | 4.6891 | 2.7042 | 4.6385 | 3.0287 | 4.6885 | 3.6597 | 4.8321 | 3.7682 | 4.7897 | 2.7792 | 4.6162 | 3.5270 | 5.5242 | 3.2654 | 4.8957 |
| CUST_387_PI4<br>16573500  | OR13C8  | 3.8705 | 3.3886 | 4.0769 | 2.3437 | 3.9198 | 3.2847 | 4.6908 | 2.7740 | 4.4920 | 3.4772 | 4.0450 | 2.9486 | 2.5845 | 3.1136 | 3.9709 | 3.3909 | 3.3729 | 2.3180 | 3.1272 | 1.5502 | 3.6501 | 2.3935 | 3.7371 | 2.9196 |
| CUST_396_PI4<br>16379584  | OR13C8  | 1.7931 | 1.9762 | 1.4428 | 0.9324 | 2.1580 | 1.6893 | 2.0062 | 1.6352 | 1.4180 | 0.7432 | 1.3539 | 3.2442 | 1.6229 | 2.0150 | 1.4638 | 1.0896 | 0.7654 | 1.4431 | 1.6407 | 1.8128 | 1.3126 | 0.9826 | 0.9905 | 1.5720 |
| CUST_160_PI4<br>16573500  | OR13C9  | 2.2315 | 2.1487 | 1.8338 | 2.3874 | 1.2656 | 2.0801 | 2.6137 | 1.6860 | 2.1654 | 2.4611 | 2.2914 | 1.8882 | 1.8592 | 2.0729 | 1.7398 | 1.5183 | 2.3160 | 1.8571 | 2.1073 | 1.9697 | 2.3269 | 1.4808 | 1.4947 | 1.7090 |
| CUST_165_PI4<br>16379584  | OR13C9  | 1.6931 | 2.0894 | 1.6423 | 1.1667 | 0.8828 | 5.3001 | 1.8220 | 1.7614 | 1.5458 | 0.7432 | 2.2235 | 1.8530 | 1.7937 | 1.9547 | 1.7226 | 1.2418 | 1.0509 | 1.6439 | 1.6195 | 1.8932 | 1.7037 | 1.1753 | 1.8419 | 1.5267 |
| A_23_P32006               | OR13D1  | 2.1790 | 2.5908 | 2.9315 | 1.0739 | 2.7356 | 1.8333 | 2.4959 | 2.1349 | 2.4742 | 0.7432 | 1.7608 | 1.7591 | 1.8838 | 2.4681 | 2.2140 | 1.1352 | 3.0534 | 1.7062 | 2.0094 | 1.8713 | 1.7221 | 1.6570 | 2.6884 | 1.9329 |
| CUST_793_PI4<br>16261804  | OR13D1  | 2.0221 | 2.2136 | 1.8424 | 1.4794 | 3.5749 | 2.2236 | 2.0844 | 1.7355 | 2.9215 | 2.9360 | 1.8576 | 1.9160 | 1.8018 | 2.0938 | 2.3431 | 1.2700 | 2.5915 | 2.7492 | 1.8621 | 2.9961 | 3.2133 | 1.6232 | 3.4042 | 2.2092 |
| CUST_278_PI4<br>16573500  | OR13F1  | 1.6160 | 1.7886 | 1.4938 | 0.8866 | 0.7798 | 1.5421 | 1.7525 | 1.4226 | 1.4782 | 0.7432 | 1.1556 | 1.5331 | 1.5910 | 1.6061 | 1.5883 | 1.0377 | 0.7372 | 1.4239 | 1.5482 | 1.6363 | 1.4010 | 0.9077 | 0.8372 | 1.4223 |
| CUST_286_PI4<br>16379584  | OR13F1  | 1.8989 | 2.2261 | 1.6911 | 1.3157 | 1.0992 | 1.9926 | 2.0563 | 1.9620 | 1.6770 | 0.7432 | 1.7457 | 1.9850 | 1.7498 | 2.1004 | 1.6872 | 1.5128 | 1.0849 | 3.0118 | 1.7021 | 2.0417 | 2.1412 | 1.3307 | 1.2389 | 1.9347 |
| CUST_1177_PI<br>416573500 | OR13G1  | 1.7310 | 2.1248 | 1.6385 | 1.2115 | 1.1724 | 1.9292 | 1.7736 | 1.7054 | 1.5740 | 0.7432 | 1.5901 | 1.9083 | 1.6802 | 1.9699 | 1.7576 | 1.2707 | 1.0410 | 1.6919 | 1.6837 | 2.0316 | 1.4695 | 1.2507 | 1.2413 | 1.5509 |
| CUST_1216_PI<br>416379584 | OR13G1  | 2.2294 | 1.8853 | 2.3540 | 0.8661 | 0.9058 | 1.4738 | 2.5087 | 1.5670 | 1.9506 | 1.9288 | 1.3821 | 1.5492 | 1.7644 | 1.6006 | 1.4257 | 1.1847 | 0.9367 | 1.4864 | 2.0731 | 1.7923 | 3.2766 | 0.7432 | 0.9794 | 2.3721 |
| CUST_389_PI4<br>16573500  | OR13H1  | 6.1272 | 4.4881 | 4.7253 | 4.4830 | 6.0146 | 2.0422 | 5.9113 | 5.0006 | 4.9843 | 4.7726 | 5.4756 | 2.7293 | 3.8305 | 5.4040 | 3.8637 | 4.6603 | 5.2852 | 2.0730 | 4.4163 | 3.9377 | 4.7239 | 4.7552 | 6.0558 | 2.9672 |
| CUST_398_PI4<br>16379584  | OR13H1  | 2.5676 | 2.1827 | 3.5793 | 2.0354 | 4.7368 | 3.1119 | 3.0066 | 2.4423 | 3.9158 | 2.8754 | 3.4363 | 1.9188 | 2.0882 | 2.6282 | 3.5958 | 4.3052 | 3.7086 | 1.8005 | 3.2495 | 1.9343 | 3.7261 | 1.3977 | 4.9456 | 3.3091 |
| CUST_279_PI4<br>16573500  | OR13J1  | 3.3326 | 2.1710 | 4.2138 | 2.2695 | 4.6446 | 3.1676 | 3.4057 | 2.1580 | 4.2892 | 3.9155 | 6.4592 | 2.1338 | 3.0310 | 2.2245 | 4.3885 | 1.7648 | 2.4418 | 2.4251 | 3.0375 | 1.9545 | 3.5228 | 1.7437 | 4.1894 | 2.4578 |
| CUST_287_PI4<br>16379584  | OR13J1  | 1.7738 | 1.9353 | 1.3602 | 0.8153 | 0.7230 | 1.4647 | 2.0604 | 1.3504 | 1.5792 | 0.7432 | 1.0881 | 1.4309 | 1.6689 | 1.4745 | 1.4353 | 0.9462 | 0.7196 | 1.4288 | 1.9401 | 1.5398 | 1.7574 | 0.7432 | 0.8774 | 1.5827 |
| CUST_498_PI4<br>16573500  | OR14A16 | 2.3574 | 2.1633 | 4.0262 | 2.2942 | 3.6920 | 2.0997 | 2.6197 | 3.5984 | 3.3947 | 3.3369 | 3.4007 | 1.8711 | 1.9549 | 2.1129 | 2.9823 | 2.5143 | 3.4507 | 1.9715 | 2.4866 | 1.9029 | 3.7863 | 2.7487 | 4.3658 | 1.7679 |
| CUST_509_PI4<br>16379584  | OR14A16 | 3.2828 | 2.6142 | 3.0682 | 1.6951 | 3.0242 | 2.5642 | 3.9332 | 3.1571 | 2.3711 | 2.0230 | 1.8519 | 1.7250 | 1.8645 | 3.1135 | 1.4773 | 1.2210 | 2.6504 | 2.7950 | 3.4156 | 2.3109 | 3.4170 | 0.8293 | 2.9284 | 4.0953 |
| CUST_497_PI4<br>16573500  | OR14C36 | 1.6369 | 1.9438 | 1.6780 | 1.0808 | 0.9070 | 1.7251 | 1.6648 | 1.5286 | 1.5305 | 0.7432 | 1.3629 | 1.7046 | 1.5911 | 1.7792 | 1.7168 | 2.4124 | 0.8731 | 1.5098 | 1.5896 | 1.8135 | 1.4448 | 1.0971 | 0.9912 | 1.4614 |
| CUST_508_PI4<br>16379584  | OR14C36 | 2.7323 | 3.2101 | 3.8877 | 4.6901 | 4.8234 | 2.3060 | 3.5390 | 4.4277 | 4.1733 | 4.9014 | 3.8200 | 1.8833 | 3.0032 | 3.4717 | 4.1932 | 1.6060 | 3.5111 | 1.6076 | 3.3446 | 3.5894 | 3.9691 | 4.7654 | 4.7205 | 3.0160 |
| CUST_618_PI4<br>16573500  | OR14I1  | 3.2013 | 3.0767 | 5.3263 | 3.9672 | 5.3484 | 2.7061 | 2.9751 | 4.3357 | 5.1957 | 4.3486 | 4.9024 | 3.8228 | 1.9172 | 2.9693 | 4.0650 | 2.3685 | 3.6247 | 1.9039 | 3.8028 | 5.5656 | 5.6781 | 3.9868 | 6.1803 | 5.5440 |
| CUST_634_PI4<br>16379584  | OR14I1  | 6.3915 | 7.4384 | 7.3479 | 7.0071 | 7.5544 | 7.8045 | 5.5451 | 7.2130 | 6.9143 | 6.4704 | 7.1416 | 7.4453 | 2.8799 | 3.9436 | 4.0140 | 4.5505 | 3.3873 | 3.8251 | 7.0454 | 8.7553 | 8.1572 | 6.8814 | 8.0546 | 8.4505 |

|                           |        |        |        |        |        |        |        |        |        |        |        |        |        |        |        |        |        |        |        |        |        |        |        |        |        |
|---------------------------|--------|--------|--------|--------|--------|--------|--------|--------|--------|--------|--------|--------|--------|--------|--------|--------|--------|--------|--------|--------|--------|--------|--------|--------|--------|
| CUST_499_P14<br>16573500  | OR14J1 | 2.1836 | 4.9405 | 2.6698 | 1.4855 | 3.0430 | 2.1212 | 2.2515 | 2.1651 | 3.2973 | 2.2529 | 2.1530 | 1.9088 | 1.8781 | 2.9980 | 2.7097 | 1.6072 | 2.8733 | 1.7465 | 2.4329 | 2.7724 | 3.1814 | 1.5522 | 2.9282 | 2.0847 |
| CUST_510_P14<br>16379584  | OR14J1 | 2.0653 | 3.0917 | 1.6659 | 1.3196 | 1.1033 | 3.3326 | 1.6789 | 1.8104 | 1.6286 | 0.7550 | 1.6861 | 1.9021 | 1.6185 | 2.0266 | 1.7210 | 1.2848 | 1.0333 | 1.6880 | 1.6518 | 2.0971 | 1.4828 | 1.4151 | 1.2559 | 2.2673 |
| A_23_P141665              | OR1A1  | 1.6255 | 1.8740 | 1.4436 | 0.9962 | 0.8455 | 1.6502 | 1.7273 | 1.4976 | 1.4599 | 0.7432 | 1.2843 | 1.6171 | 1.5999 | 1.6841 | 1.6027 | 1.0799 | 0.8123 | 1.4640 | 1.5847 | 1.7446 | 1.3906 | 1.0087 | 0.9520 | 1.4502 |
| CUST_2246_P1<br>416261804 | OR1A1  | 2.0643 | 2.3910 | 2.9858 | 1.6761 | 1.1691 | 1.9476 | 2.2580 | 1.7406 | 2.3034 | 1.4862 | 1.9810 | 1.8849 | 1.8455 | 2.0146 | 1.7537 | 1.3340 | 1.1346 | 1.6837 | 2.1990 | 2.1037 | 2.2988 | 1.2820 | 1.4665 | 1.8427 |
| A_23_P130281              | OR1A2  | 1.7808 | 2.1632 | 2.1358 | 3.0929 | 2.3293 | 2.1067 | 1.7644 | 1.7027 | 2.6622 | 0.8954 | 1.7632 | 1.9716 | 1.6960 | 2.0339 | 1.9313 | 1.2482 | 0.8698 | 1.7945 | 1.7313 | 2.0483 | 1.7149 | 1.4085 | 2.9316 | 1.5913 |
| CUST_1546_P1<br>416261804 | OR1A2  | 2.1659 | 1.6786 | 1.9522 | 1.0550 | 4.1047 | 1.8296 | 2.4999 | 1.2929 | 2.5795 | 0.7432 | 3.2774 | 1.5835 | 2.0554 | 1.6834 | 1.9764 | 3.9444 | 3.0437 | 1.7172 | 2.0879 | 1.4534 | 3.1070 | 1.1935 | 3.4010 | 1.8975 |
| CUST_500_P14<br>16573500  | OR1B1  | 1.8215 | 2.0946 | 1.7314 | 1.3812 | 1.2343 | 2.0375 | 1.9484 | 1.6800 | 2.0038 | 0.7432 | 2.0508 | 1.8738 | 1.7537 | 2.0293 | 1.7382 | 1.4977 | 1.0009 | 1.6790 | 1.7567 | 1.9418 | 1.5721 | 1.4185 | 1.0706 | 1.5223 |
| CUST_511_P14<br>16379584  | OR1B1  | 1.6309 | 1.9225 | 1.7017 | 1.0979 | 2.0591 | 1.7683 | 1.6696 | 1.7452 | 1.4749 | 0.7432 | 1.3967 | 1.7373 | 1.7665 | 1.7903 | 1.8365 | 1.1744 | 0.8118 | 1.4976 | 1.7651 | 1.7819 | 1.4602 | 1.1164 | 0.9304 | 1.4370 |
| A_24_P299769              | OR1C1  | 1.7014 | 2.0618 | 1.6250 | 1.2091 | 1.2233 | 1.8381 | 1.7215 | 1.6420 | 2.1804 | 0.7432 | 2.2918 | 1.7801 | 1.6435 | 1.9101 | 1.7747 | 1.2232 | 1.3723 | 1.5871 | 1.6243 | 1.9237 | 1.4971 | 1.2298 | 1.1593 | 1.4960 |
| CUST_5283_P1<br>416261804 | OR1C1  | 1.7855 | 2.0463 | 1.6916 | 1.1942 | 2.6115 | 1.8111 | 1.9280 | 1.6349 | 1.6367 | 0.7432 | 1.4951 | 1.7587 | 2.1959 | 1.8974 | 1.7647 | 1.2168 | 0.9680 | 1.5744 | 1.8696 | 1.9013 | 1.8473 | 1.2032 | 1.1724 | 1.5318 |
| A_23_P27239               | OR1D2  | 2.5412 | 2.3652 | 4.2142 | 4.1611 | 4.2934 | 2.4133 | 2.8387 | 3.1532 | 3.7487 | 4.6090 | 3.9753 | 1.9792 | 2.0574 | 3.8273 | 4.3185 | 2.0258 | 4.0073 | 2.0314 | 2.4174 | 2.8182 | 3.5420 | 4.4591 | 5.0352 | 2.0063 |
| CUST_1335_P1<br>416261804 | OR1D2  | 2.0313 | 1.6825 | 3.1245 | 2.0183 | 4.7083 | 1.6437 | 2.3698 | 1.3047 | 2.9420 | 2.7525 | 2.6769 | 1.5641 | 1.8821 | 1.6713 | 2.0669 | 0.9324 | 2.5775 | 1.6324 | 1.9622 | 1.4870 | 3.2201 | 1.0364 | 3.3154 | 1.7908 |
| A_23_P15832               | OR1D4  | 2.0008 | 2.0133 | 2.2434 | 1.2542 | 1.0378 | 1.9739 | 2.1884 | 1.6014 | 1.8557 | 0.7432 | 1.5029 | 1.9181 | 2.2966 | 2.0888 | 1.7545 | 1.4328 | 1.1868 | 1.8874 | 1.8592 | 1.8463 | 2.8169 | 1.4650 | 1.7534 | 1.7814 |
| CUST_1575_P1<br>416261804 | OR1D4  | 1.6585 | 1.9463 | 2.9749 | 0.8999 | 0.9051 | 2.4787 | 2.4756 | 2.1876 | 2.6312 | 2.3776 | 2.1637 | 2.7821 | 1.5976 | 1.6887 | 1.4308 | 1.2127 | 1.1063 | 1.9547 | 1.5611 | 3.1831 | 3.7181 | 2.5048 | 0.8397 | 1.5582 |
| CUST_1102_P1<br>416261804 | OR1D5  | 5.1042 | 4.4872 | 5.2057 | 5.6913 | 5.4809 | 3.4650 | 5.5935 | 4.3794 | 4.9146 | 5.1558 | 5.1196 | 4.1594 | 4.0960 | 4.2085 | 5.1696 | 4.6438 | 4.7305 | 3.4019 | 5.2293 | 4.7499 | 5.4424 | 5.7338 | 5.3260 | 4.4267 |
| A_23_P101073              | OR1E1  | 1.8831 | 1.9735 | 1.9470 | 1.0664 | 3.2605 | 1.7804 | 2.0838 | 2.9050 | 2.3582 | 0.7432 | 1.5094 | 1.6894 | 1.7490 | 2.7291 | 1.9531 | 1.0474 | 1.3764 | 1.5584 | 1.7609 | 2.0248 | 1.7957 | 1.1042 | 1.0490 | 1.6019 |
| CUST_1977_P1<br>416261804 | OR1E1  | 3.0326 | 3.2171 | 5.1534 | 4.6649 | 5.7785 | 3.9313 | 3.3226 | 4.9000 | 4.8831 | 5.5468 | 4.1568 | 4.0693 | 3.1685 | 4.6936 | 5.3268 | 3.1367 | 3.8442 | 3.8734 | 4.5210 | 3.7429 | 4.7817 | 4.5787 | 4.8172 | 3.9806 |
| CUST_678_P14<br>16261804  | OR1E2  | 1.9203 | 1.9232 | 2.1912 | 1.1854 | 4.1525 | 1.8341 | 2.1374 | 1.5274 | 2.9632 | 2.4287 | 2.8755 | 1.6999 | 1.7516 | 1.8530 | 2.9513 | 1.1453 | 2.7261 | 1.5568 | 2.0915 | 1.7232 | 2.9888 | 1.1919 | 2.7386 | 1.8241 |
| A_23_P318890              | OR1F1  | 3.5088 | 3.4763 | 4.1102 | 3.1970 | 3.7107 | 2.8696 | 3.7988 | 3.5763 | 4.0415 | 3.7159 | 3.4030 | 2.9556 | 4.1613 | 2.0001 | 2.3231 | 3.1945 | 2.9519 | 2.4600 | 3.5012 | 1.8612 | 4.2924 | 3.7942 | 3.0927 | 3.3000 |
| CUST_1380_P1<br>416261804 | OR1F1  | 2.0532 | 2.9104 | 1.9560 | 1.5226 | 1.3834 | 2.2654 | 2.1978 | 2.7485 | 1.9984 | 0.7550 | 1.6660 | 2.0703 | 1.8763 | 2.2279 | 2.6396 | 1.7037 | 1.4743 | 1.7845 | 1.8920 | 2.0747 | 1.7079 | 1.6738 | 1.2565 | 1.7084 |
| A_23_P382506              | OR1F2P | 1.6951 | 1.8594 | 3.5441 | 2.5075 | 2.5430 | 1.7156 | 1.8623 | 2.7671 | 2.2885 | 3.6962 | 1.9456 | 1.6213 | 1.6462 | 1.7037 | 3.2463 | 1.0087 | 1.5070 | 1.5161 | 1.9114 | 1.6727 | 2.6229 | 3.7487 | 1.7216 | 1.4807 |

| A_24_P58247               | OR1F2P | 2.4966 | 2.3568 | 3.6408 | 2.4153 | 3.5948 | 1.9436 | 2.8170 | 2.0593 | 4.0941 | 4.0245 | 3.1558 | 1.9121 | 2.1345 | 2.1971 | 4.1672 | 2.0479 | 2.6879 | 3.2010 | 3.1501 | 2.7320 | 3.6713 | 3.3506 | 4.2105 | 3.4709 |
|---------------------------|--------|--------|--------|--------|--------|--------|--------|--------|--------|--------|--------|--------|--------|--------|--------|--------|--------|--------|--------|--------|--------|--------|--------|--------|--------|
| A_23_P38634               | OR1G1  | 1.8127 | 2.5017 | 1.7450 | 2.3554 | 1.1611 | 2.3519 | 1.7986 | 3.0771 | 1.6382 | 1.2748 | 1.6154 | 2.0020 | 1.8968 | 2.1646 | 1.6622 | 1.4805 | 0.9287 | 2.9767 | 2.8605 | 2.0639 | 1.6089 | 1.6891 | 1.2262 | 3.1110 |
| CUST_9374_PI<br>416261804 | OR1G1  | 1.8581 | 2.1877 | 1.6705 | 1.2635 | 1.0858 | 3.3038 | 1.9706 | 1.7272 | 1.8646 | 0.7432 | 1.6904 | 1.8899 | 1.7586 | 1.9722 | 1.7924 | 1.2966 | 1.1414 | 1.7263 | 1.7657 | 2.0656 | 1.5464 | 1.2940 | 1.3279 | 2.8859 |
| CUST_152_PI4<br>16573500  | OR1I1  | 1.9385 | 2.3478 | 1.9899 | 1.2860 | 1.8577 | 1.9191 | 2.7237 | 1.6216 | 2.2078 | 2.2217 | 1.4489 | 1.8486 | 3.0338 | 2.0081 | 1.6890 | 1.3953 | 1.8539 | 2.0489 | 1.9946 | 2.0063 | 2.3266 | 1.2832 | 2.8103 | 1.8767 |
| CUST_157_PI4<br>16379584  | OR1I1  | 3.9663 | 2.1173 | 4.0933 | 2.8421 | 3.2547 | 2.4741 | 3.7197 | 1.7609 | 3.8065 | 3.2893 | 3.7463 | 2.8541 | 2.2008 | 2.8362 | 3.1274 | 1.3992 | 3.1804 | 2.8578 | 3.6607 | 2.8559 | 4.6066 | 3.1395 | 4.1182 | 2.9151 |
| CUST_311_PI4<br>16573500  | OR1J1  | 1.6094 | 1.8370 | 1.4655 | 1.0445 | 1.6533 | 1.6765 | 1.6631 | 1.4650 | 1.5082 | 0.7432 | 1.2828 | 1.6043 | 1.5706 | 1.7406 | 2.1598 | 1.0416 | 0.7705 | 1.4460 | 1.5414 | 1.6458 | 1.4425 | 1.0449 | 0.9697 | 1.4316 |
| CUST_319_PI4<br>16379584  | OR1J1  | 2.7002 | 2.3364 | 2.3011 | 1.3463 | 1.2212 | 2.8132 | 3.3832 | 2.1400 | 1.6002 | 1.9777 | 1.6242 | 1.9265 | 2.7771 | 3.6902 | 1.5845 | 1.6101 | 1.0384 | 2.9586 | 2.9817 | 1.9802 | 2.4456 | 1.2920 | 1.2777 | 3.9508 |
| CUST_183_PI4<br>16573500  | OR1J2  | 1.7408 | 1.9860 | 1.8084 | 1.2291 | 1.0669 | 1.9051 | 1.8308 | 1.5694 | 1.5184 | 0.7432 | 1.3978 | 1.8102 | 1.7047 | 1.9371 | 1.5879 | 1.3147 | 0.8442 | 1.5939 | 1.6998 | 1.8093 | 1.5088 | 1.2784 | 1.2472 | 1.4588 |
| CUST_188_PI4<br>16379584  | OR1J2  | 2.5859 | 2.2034 | 2.4640 | 1.2593 | 2.4462 | 3.7464 | 3.0053 | 3.1066 | 2.9742 | 2.0430 | 2.4747 | 1.7729 | 2.8549 | 2.0276 | 1.7268 | 1.6422 | 1.0605 | 1.7755 | 2.3070 | 3.5776 | 3.1473 | 1.2368 | 2.1312 | 2.9758 |
| CUST_377_PI4<br>16573500  | OR1J4  | 3.8604 | 5.2530 | 3.7383 | 4.3286 | 4.6355 | 2.7739 | 2.9002 | 4.1040 | 3.6490 | 4.2451 | 4.1081 | 1.7483 | 2.2094 | 3.3683 | 3.6446 | 4.9708 | 4.2429 | 2.8335 | 2.9504 | 4.2655 | 3.3231 | 3.4205 | 4.2636 | 2.0862 |
| CUST_386_PI4<br>16379584  | OR1J4  | 4.4058 | 4.6661 | 5.7083 | 4.7185 | 6.0894 | 3.9475 | 4.3603 | 3.9544 | 5.6769 | 5.3121 | 4.8586 | 3.3880 | 2.3310 | 5.6481 | 5.6738 | 3.0898 | 5.0434 | 4.0060 | 5.3538 | 4.5148 | 5.0749 | 5.1441 | 5.9996 | 3.9757 |
| CUST_162_PI4<br>16573500  | OR1K1  | 4.9224 | 2.3696 | 4.4158 | 3.4874 | 4.8292 | 3.0882 | 5.1898 | 4.0757 | 4.6310 | 3.4456 | 4.0264 | 2.2609 | 3.2191 | 4.6192 | 4.4445 | 3.9664 | 3.9591 | 1.9804 | 5.0950 | 1.8992 | 3.9707 | 3.8530 | 5.1338 | 3.2410 |
| CUST_167_PI4<br>16379584  | OR1K1  | 1.8394 | 2.3434 | 1.7580 | 2.5279 | 1.3097 | 2.0859 | 1.8879 | 1.8015 | 1.7117 | 0.7550 | 1.8529 | 2.1433 | 1.7730 | 2.0894 | 1.9087 | 1.3976 | 2.3996 | 1.8677 | 1.7787 | 2.2365 | 1.6432 | 1.3872 | 1.4055 | 1.6697 |
| CUST_300_PI4<br>16573500  | OR1L1  | 1.6598 | 1.9540 | 1.8587 | 1.1648 | 0.9662 | 1.8391 | 1.7031 | 1.5262 | 1.4775 | 0.7432 | 1.3168 | 1.7361 | 1.5866 | 1.8287 | 1.6725 | 1.2312 | 0.7912 | 1.5106 | 1.6198 | 1.7976 | 1.4703 | 1.1949 | 0.9096 | 1.4288 |
| CUST_308_PI4<br>16379584  | OR1L1  | 4.0204 | 2.0622 | 2.7474 | 1.1389 | 0.6953 | 3.1642 | 3.1730 | 1.5468 | 2.1939 | 1.0992 | 1.2715 | 2.9800 | 1.9261 | 1.5827 | 1.3386 | 1.0436 | 0.8395 | 2.4288 | 2.3866 | 3.4598 | 3.4361 | 2.3234 | 0.9927 | 4.0774 |
| A_23_P94647               | OR1L3  | 1.6161 | 1.8909 | 1.4447 | 0.9900 | 0.8587 | 1.6528 | 1.7344 | 1.5189 | 1.4368 | 0.7432 | 1.2861 | 1.6127 | 1.5822 | 1.6786 | 1.5983 | 1.0868 | 0.7405 | 1.4404 | 1.5761 | 1.7558 | 1.3735 | 0.9897 | 1.8531 | 1.6054 |
| CUST_2173_PI<br>416261804 | OR1L3  | 1.7517 | 3.2861 | 1.5135 | 0.9426 | 0.7674 | 1.7030 | 1.6584 | 1.9394 | 1.3799 | 0.7432 | 1.2568 | 1.5193 | 1.5377 | 3.3658 | 1.4873 | 1.5409 | 0.6745 | 1.6461 | 1.5225 | 1.6904 | 1.4856 | 0.9964 | 0.8422 | 1.5873 |
| A_23_P83244               | OR1L4  | 1.8276 | 2.4001 | 2.0077 | 1.1750 | 1.8379 | 1.9682 | 1.8880 | 2.0930 | 2.1890 | 0.7432 | 1.6926 | 2.0482 | 1.7692 | 2.0594 | 1.7285 | 1.4386 | 1.1063 | 1.6672 | 1.7141 | 2.2394 | 1.5595 | 1.1499 | 1.1706 | 1.7215 |
| CUST_951_PI4<br>16261804  | OR1L4  | 2.0181 | 4.1168 | 4.1880 | 3.4366 | 1.1175 | 4.8741 | 3.2009 | 2.9547 | 3.4394 | 1.3889 | 2.5194 | 4.1335 | 1.8370 | 4.2204 | 3.2309 | 4.3057 | 0.8741 | 4.6811 | 1.9833 | 3.7057 | 4.1163 | 3.1497 | 1.8117 | 4.0534 |
| CUST_1649_PI<br>416261804 | OR1L6  | 1.8817 | 4.0273 | 2.9427 | 2.3963 | 0.9493 | 3.6612 | 2.9900 | 2.6198 | 2.5075 | 0.7432 | 1.9099 | 3.9426 | 1.6927 | 3.8009 | 1.6631 | 2.3866 | 1.0120 | 3.6074 | 2.1115 | 4.2099 | 3.7967 | 3.9380 | 1.2628 | 3.9545 |
| CUST_435_PI4<br>16573500  | OR1L8  | 1.5969 | 1.9663 | 1.6697 | 1.0936 | 1.1972 | 1.6721 | 1.6788 | 1.5628 | 1.8630 | 0.7432 | 1.3421 | 1.6941 | 1.5826 | 1.8213 | 1.7244 | 1.1444 | 0.8651 | 1.4843 | 1.5462 | 1.7393 | 2.1709 | 1.0537 | 0.9182 | 1.4300 |
| CUST_444_PI4<br>16379584  | OR1L8  | 1.5908 | 2.1375 | 1.5279 | 1.9265 | 1.5979 | 1.7150 | 1.7425 | 2.5212 | 1.5229 | 2.3017 | 2.0321 | 1.7865 | 1.6187 | 1.9288 | 1.6775 | 3.2644 | 1.1475 | 1.5368 | 1.5411 | 3.0845 | 1.3611 | 3.3515 | 1.0393 | 2.0944 |
| CUST_312_PI4<br>16573500  | OR1M1  | 2.1257 | 2.4423 | 1.7796 | 1.2377 | 1.1769 | 2.4783 | 2.3633 | 2.5535 | 2.1077 | 1.0034 | 2.9836 | 2.1109 | 1.9273 | 2.0541 | 1.9363 | 1.4233 | 1.4845 | 1.8182 | 1.9968 | 2.7843 | 1.8113 | 1.2066 | 1.3824 | 3.5059 |
| CUST_320_PI4<br>16379584  | OR1M1  | 1.7782 | 2.3193 | 1.7246 | 1.2165 | 1.2521 | 2.0391 | 1.8467 | 2.0059 | 1.6334 | 0.8231 | 1.6546 | 1.9952 | 1.7502 | 2.1006 | 1.8022 | 1.3052 | 1.1555 | 1.8301 | 1.7318 | 2.2515 | 1.5818 | 1.2562 | 1.4025 | 1.6619 |

|                            |         |        |        |        |        |        |        |        |        |        |        |        |        |        |        |        |        |        |        |        |        |        |        |        |        |
|----------------------------|---------|--------|--------|--------|--------|--------|--------|--------|--------|--------|--------|--------|--------|--------|--------|--------|--------|--------|--------|--------|--------|--------|--------|--------|--------|
| CUST_265_Pi4<br>16573500   | OR1N1   | 2.0236 | 2.0759 | 3.2884 | 1.3003 | 3.3002 | 1.9992 | 2.1891 | 1.6284 | 2.8555 | 2.3606 | 1.4967 | 1.7851 | 1.8026 | 1.9582 | 2.2419 | 1.2474 | 2.6460 | 1.6745 | 1.8562 | 1.8952 | 2.7578 | 1.3298 | 2.1424 | 2.0360 |
| CUST_273_Pi4<br>16379584   | OR1N1   | 2.7071 | 2.0741 | 2.1389 | 1.8071 | 3.5900 | 1.8594 | 2.6906 | 2.8016 | 3.0158 | 0.9414 | 1.9620 | 1.7601 | 2.5564 | 2.1352 | 1.8022 | 2.3171 | 0.7358 | 1.7114 | 2.4317 | 1.8668 | 2.4512 | 1.2524 | 3.0542 | 1.9273 |
| A_23_P135226               | OR1N2   | 2.2668 | 1.8775 | 2.7249 | 1.3653 | 2.7281 | 1.5857 | 2.6619 | 1.5446 | 2.2962 | 1.2779 | 2.7078 | 1.5649 | 1.8399 | 1.7177 | 1.5168 | 1.3244 | 0.8349 | 1.5769 | 1.9714 | 1.6855 | 3.1543 | 0.9964 | 3.3018 | 1.8756 |
| CUST_2254_Pi<br>416261804  | OR1N2   | 1.8408 | 2.2067 | 2.1216 | 1.1544 | 2.9567 | 1.8905 | 1.9964 | 1.6981 | 1.6699 | 0.8404 | 1.4426 | 1.8863 | 1.7659 | 1.9229 | 1.7089 | 1.1531 | 0.9594 | 4.5716 | 1.7926 | 1.9381 | 1.6444 | 1.1753 | 1.4197 | 1.6666 |
| A_24_P283591               | OR1Q1   | 1.6853 | 1.9832 | 1.6673 | 1.2617 | 0.8315 | 1.9439 | 1.5966 | 1.5221 | 1.6158 | 0.7432 | 1.2977 | 1.8170 | 1.6424 | 1.9520 | 1.8459 | 1.0810 | 0.7196 | 1.5985 | 1.6145 | 1.7661 | 1.6649 | 1.3035 | 0.9972 | 1.5166 |
| CUST_1905_Pi<br>416261804  | OR1Q1   | 2.7590 | 3.1852 | 2.4110 | 1.4067 | 1.9154 | 2.0130 | 3.2202 | 2.8955 | 2.3417 | 1.8882 | 1.5687 | 1.8777 | 2.0488 | 2.0550 | 1.8293 | 1.4720 | 0.9419 | 2.4792 | 2.7449 | 1.9966 | 3.1312 | 1.3375 | 1.3416 | 3.3248 |
| CUST_220_Pi4<br>16573500   | OR1S1   | 3.9135 | 2.0718 | 4.0001 | 1.2963 | 3.4085 | 1.9785 | 3.8135 | 1.5795 | 4.0558 | 2.7575 | 3.0706 | 1.8001 | 2.1068 | 1.9712 | 3.6728 | 1.3429 | 0.8420 | 1.8227 | 3.4983 | 1.8784 | 3.0524 | 1.3699 | 3.7646 | 2.2891 |
| A_23_P13294                | OR1S2   | 2.3895 | 2.0139 | 3.5919 | 1.5634 | 3.1205 | 1.9576 | 2.7565 | 2.8242 | 2.8796 | 2.9408 | 3.3095 | 1.7818 | 2.0124 | 2.2756 | 1.7370 | 1.2621 | 3.2135 | 1.7817 | 2.4446 | 1.8266 | 2.4618 | 1.3472 | 3.7001 | 2.0494 |
| CUST_1655_Pi<br>416261804  | OR1S2   | 2.3565 | 3.2889 | 2.1018 | 1.2042 | 0.8223 | 4.2114 | 3.3063 | 2.6370 | 2.6009 | 1.4495 | 1.4992 | 1.8812 | 1.7916 | 2.2794 | 1.3703 | 1.1799 | 0.9222 | 3.7870 | 2.0641 | 3.0889 | 3.5201 | 2.3675 | 1.1286 | 2.9196 |
| CUST_226_Pi4<br>16379584   | OR1S2   | 1.7830 | 3.3059 | 1.9881 | 2.2547 | 2.1605 | 1.7774 | 2.0494 | 3.1012 | 2.0107 | 0.7432 | 1.4853 | 1.6245 | 1.5530 | 3.7760 | 1.4158 | 3.0291 | 0.8566 | 2.4825 | 1.7007 | 2.6723 | 2.7855 | 1.3262 | 0.9795 | 3.6213 |
| CUST_140_Pi4<br>16573500   | OR2A1   | 3.7027 | 3.1779 | 5.1506 | 4.0948 | 4.9569 | 3.1733 | 3.3395 | 4.4405 | 5.1616 | 5.1775 | 3.8199 | 3.9171 | 3.2052 | 6.5541 | 5.5058 | 3.4701 | 4.0764 | 2.4961 | 3.7043 | 3.5781 | 4.9572 | 4.3891 | 4.5539 | 3.7965 |
| CUST_145_Pi4<br>16379584   | OR2A1   | 2.0666 | 2.1243 | 1.7752 | 3.0753 | 3.7830 | 1.9099 | 2.3315 | 1.8177 | 1.6866 | 4.2358 | 3.1700 | 1.9165 | 1.8953 | 2.0427 | 2.1526 | 1.3262 | 2.5140 | 1.7981 | 1.9033 | 1.9394 | 1.7388 | 1.3029 | 3.2248 | 2.4810 |
| CUST_609_Pi4<br>16573500   | OR2A12  | 2.3701 | 2.3766 | 2.8563 | 2.6136 | 4.3143 | 1.9960 | 2.5788 | 2.9406 | 2.8470 | 3.5810 | 2.8155 | 1.9066 | 2.1061 | 2.9649 | 2.8272 | 2.0447 | 3.1912 | 1.9330 | 2.3867 | 2.2549 | 3.2216 | 1.1287 | 3.0814 | 2.0458 |
| CUST_625_Pi4<br>16379584   | OR2A12  | 1.9273 | 1.9759 | 1.9478 | 0.8802 | 0.8702 | 1.5196 | 2.2774 | 2.6909 | 1.3454 | 0.7432 | 1.1805 | 2.4747 | 2.0631 | 1.5501 | 1.4182 | 1.1453 | 0.8153 | 1.4526 | 1.9361 | 2.8592 | 2.9336 | 0.8610 | 0.8487 | 2.0556 |
| A_23_P59783                | OR2A14  | 1.8502 | 2.1073 | 1.5593 | 1.1367 | 1.0773 | 1.9036 | 2.0136 | 1.6940 | 1.4828 | 0.7432 | 1.4843 | 1.8264 | 1.7172 | 1.9190 | 1.6167 | 1.2248 | 0.9027 | 1.6401 | 1.7349 | 1.9908 | 1.4408 | 1.1879 | 1.2280 | 1.9129 |
| CUST_5278_Pi<br>416261804  | OR2A14  | 5.2403 | 4.6338 | 5.4749 | 4.6246 | 6.4450 | 5.3130 | 5.7072 | 5.6032 | 5.5552 | 5.2451 | 5.3544 | 3.2102 | 3.5585 | 5.3163 | 4.4516 | 3.8608 | 4.8159 | 2.9720 | 4.9466 | 2.4085 | 5.0796 | 4.5496 | 7.3396 | 3.5548 |
| CUST_608_Pi4<br>16573500   | OR2A2   | 1.7734 | 2.0779 | 1.8942 | 1.1890 | 1.4076 | 1.8479 | 1.8851 | 1.8053 | 2.4901 | 1.3267 | 1.4701 | 1.8606 | 1.6910 | 1.9142 | 1.8141 | 1.2512 | 2.8800 | 1.6530 | 1.7008 | 1.9739 | 2.1804 | 1.2083 | 3.9528 | 1.5629 |
| CUST_624_Pi4<br>16379584   | OR2A2   | 4.7658 | 4.5587 | 4.6099 | 3.7812 | 4.8853 | 5.5450 | 4.3428 | 4.9826 | 5.1196 | 4.4843 | 4.3459 | 3.9896 | 3.5912 | 5.2143 | 3.9566 | 4.2557 | 3.6099 | 2.7804 | 4.1385 | 3.0921 | 5.3219 | 3.8523 | 5.1574 | 3.8730 |
| A_24_P506816               | OR2A20P | 1.6139 | 1.8209 | 1.7996 | 0.9963 | 1.0402 | 1.6585 | 1.7179 | 1.4365 | 1.6316 | 0.7432 | 1.1619 | 1.5813 | 1.5762 | 1.6600 | 1.9857 | 1.5109 | 0.7022 | 1.4507 | 1.5755 | 1.6610 | 1.4091 | 1.0174 | 0.8523 | 1.4243 |
| CUST_7315_Pi<br>416261804  | OR2A20P | 3.4028 | 2.4878 | 3.2961 | 2.8990 | 2.6666 | 1.7377 | 2.9604 | 1.2600 | 2.9596 | 3.4931 | 2.3849 | 2.6368 | 2.4256 | 1.6670 | 2.6601 | 3.4395 | 2.4714 | 1.6491 | 2.9472 | 1.4809 | 3.1842 | 1.2449 | 2.8352 | 2.4160 |
| A_24_P52293                | OR2A25  | 1.9160 | 2.3921 | 1.6875 | 1.2869 | 2.8635 | 2.0537 | 1.9129 | 1.6357 | 1.6468 | 0.7432 | 1.6751 | 2.0013 | 1.7876 | 1.9944 | 1.8113 | 1.3172 | 0.8491 | 1.7597 | 2.0001 | 1.9981 | 1.6776 | 1.3343 | 1.2870 | 1.7035 |
| CUST_13131_P<br>i416261804 | OR2A25  | 3.0495 | 2.3170 | 2.2919 | 1.2028 | 1.1305 | 2.3722 | 3.1111 | 2.0262 | 1.4609 | 0.7432 | 1.4948 | 3.2149 | 2.0434 | 1.8852 | 1.4542 | 1.4795 | 1.0080 | 2.8906 | 2.3924 | 1.8588 | 2.5402 | 1.2335 | 1.1929 | 3.2613 |

|                           |        |        |        |        |        |        |        |        |        |        |        |        |        |        |        |        |        |        |        |        |        |        |        |        |        |
|---------------------------|--------|--------|--------|--------|--------|--------|--------|--------|--------|--------|--------|--------|--------|--------|--------|--------|--------|--------|--------|--------|--------|--------|--------|--------|--------|
| A_23_P134566              | OR2A4  | 1.7159 | 2.0573 | 2.3462 | 1.8395 | 1.0466 | 1.9539 | 1.7139 | 1.5923 | 2.3052 | 1.6480 | 1.9222 | 1.8619 | 1.6396 | 1.9544 | 1.6576 | 1.2094 | 0.7689 | 1.6437 | 1.6631 | 1.9124 | 1.9360 | 1.2806 | 2.6095 | 1.4987 |
| CUST_767_P14<br>16261804  | OR2A4  | 1.8341 | 2.1648 | 2.5130 | 1.2455 | 3.3961 | 2.0474 | 1.9023 | 1.6596 | 2.4296 | 2.0476 | 1.4917 | 1.9799 | 1.8044 | 2.0615 | 1.8374 | 1.2459 | 2.7574 | 1.8785 | 1.7838 | 2.0838 | 2.5629 | 1.3196 | 2.8348 | 1.6916 |
| CUST_508_P14<br>16573500  | OR2A5  | 3.8244 | 2.0780 | 4.5698 | 3.0484 | 2.6569 | 4.5670 | 3.4349 | 2.6577 | 4.0855 | 2.1294 | 1.5187 | 3.9767 | 2.4318 | 2.1390 | 1.5571 | 4.8411 | 0.8988 | 3.7099 | 3.6053 | 3.1240 | 4.3878 | 3.0703 | 2.2482 | 5.3966 |
| CUST_519_P14<br>16379584  | OR2A5  | 1.8161 | 2.1508 | 1.7907 | 1.3021 | 1.0519 | 1.9297 | 1.9507 | 1.8585 | 1.6689 | 0.7432 | 1.6857 | 1.9725 | 1.7711 | 2.1026 | 1.7784 | 1.4409 | 1.1928 | 1.7513 | 1.6776 | 1.9735 | 1.4997 | 1.3262 | 1.1962 | 1.6354 |
| A_23_P123172              | OR2A9P | 3.4885 | 1.9593 | 3.0600 | 3.8495 | 0.8283 | 1.8955 | 3.9791 | 2.1282 | 2.8966 | 2.6062 | 1.0653 | 1.6414 | 2.8594 | 1.7489 | 1.8130 | 4.6457 | 1.9071 | 1.9718 | 6.7354 | 1.7333 | 3.0740 | 1.8017 | 1.7226 | 2.9429 |
| CUST_301_P14<br>16573500  | OR2AE1 | 1.7255 | 2.1628 | 1.6654 | 1.2072 | 2.3317 | 1.9516 | 1.7637 | 1.7036 | 1.5917 | 0.7432 | 2.5001 | 1.9284 | 1.6828 | 2.0215 | 1.7503 | 1.2742 | 1.0724 | 1.7004 | 1.6768 | 2.0531 | 2.3993 | 1.2502 | 2.4507 | 1.5285 |
| CUST_309_P14<br>16379584  | OR2AE1 | 1.6865 | 2.9727 | 1.9854 | 1.0524 | 1.4470 | 3.0759 | 1.8967 | 1.6457 | 1.5999 | 0.7432 | 1.4966 | 1.8381 | 1.6490 | 2.7968 | 1.6717 | 1.2636 | 1.0262 | 2.2060 | 1.6659 | 1.9557 | 2.5582 | 1.1015 | 1.0628 | 1.5286 |
| CUST_171_P14<br>16573500  | OR2AG1 | 1.6982 | 1.8962 | 1.9386 | 2.0528 | 2.5633 | 2.8003 | 1.8051 | 1.7954 | 2.2812 | 1.6144 | 1.6689 | 1.7035 | 1.9963 | 2.5199 | 2.0867 | 1.0905 | 0.6905 | 1.5395 | 1.6476 | 1.7427 | 1.5918 | 3.6866 | 2.5507 | 1.4839 |
| CUST_176_P14<br>16379584  | OR2AG1 | 1.7796 | 1.9466 | 1.8605 | 0.9211 | 1.9203 | 2.1428 | 2.0764 | 2.4008 | 2.5588 | 2.8165 | 2.3515 | 1.5886 | 1.6299 | 1.6748 | 1.6087 | 1.1461 | 0.8047 | 1.7542 | 2.1420 | 2.7712 | 2.4153 | 2.6293 | 0.8836 | 1.5551 |
| CUST_67_P141<br>6573500   | OR2AG2 | 1.9271 | 2.4859 | 1.9263 | 1.4885 | 1.2615 | 2.2122 | 1.9703 | 1.7941 | 2.3958 | 0.7688 | 1.8282 | 2.2524 | 2.0067 | 2.1720 | 1.9748 | 1.3906 | 1.2232 | 1.9349 | 3.0508 | 2.2791 | 1.7545 | 1.5676 | 1.5320 | 1.7304 |
| CUST_71_P141<br>6379584   | OR2AG2 | 3.5461 | 3.5543 | 5.4296 | 4.3513 | 6.3703 | 4.2663 | 3.8823 | 4.8700 | 5.3170 | 4.6467 | 4.5861 | 1.8776 | 3.0421 | 4.6580 | 5.5814 | 3.3359 | 4.2846 | 3.4597 | 4.3726 | 4.1213 | 4.7816 | 4.3254 | 5.4891 | 3.8816 |
| CUST_174_P14<br>16573500  | OR2AK2 | 1.7175 | 1.7452 | 1.5904 | 1.0400 | 1.7252 | 1.8093 | 1.7763 | 2.8493 | 1.6065 | 0.7432 | 1.4975 | 1.5523 | 1.6448 | 2.0392 | 1.5245 | 0.8618 | 2.4173 | 1.5618 | 1.7427 | 1.5087 | 1.5083 | 1.1753 | 1.7227 | 1.5324 |
| CUST_179_P14<br>16379584  | OR2AK2 | 5.6481 | 6.0102 | 3.6384 | 2.6299 | 3.6505 | 3.7655 | 4.8484 | 5.9294 | 3.9800 | 3.9760 | 4.0871 | 3.8114 | 4.8333 | 5.4180 | 3.1940 | 3.6050 | 4.2931 | 4.2074 | 4.5874 | 5.8642 | 3.6884 | 3.2842 | 4.4978 | 4.4582 |
| CUST_47_P141<br>6573500   | OR2AT4 | 2.3653 | 2.3161 | 4.0542 | 3.1041 | 4.5116 | 2.5513 | 2.3325 | 3.6336 | 3.9149 | 4.2893 | 3.4477 | 1.8894 | 2.2906 | 3.7947 | 2.2420 | 3.0976 | 4.1606 | 1.7570 | 2.7030 | 3.0184 | 3.5808 | 3.7692 | 4.4338 | 2.5476 |
| CUST_50_P141<br>6379584   | OR2AT4 | 2.1424 | 1.9580 | 1.9556 | 2.8644 | 0.8441 | 2.1784 | 2.3496 | 3.3032 | 2.2387 | 2.9823 | 1.2897 | 1.4653 | 2.3694 | 1.6684 | 1.4486 | 2.2944 | 2.4124 | 2.0011 | 2.3216 | 3.2724 | 1.6032 | 3.1858 | 0.9506 | 2.3694 |
| CUST_945_P14<br>16573500  | OR2B11 | 2.6140 | 2.0553 | 1.8291 | 1.3503 | 1.6444 | 1.9873 | 2.1143 | 1.4938 | 2.2889 | 1.2744 | 2.6614 | 1.8775 | 1.9018 | 2.0138 | 1.8869 | 1.2954 | 1.1545 | 1.7827 | 1.7953 | 1.8931 | 1.8196 | 1.3736 | 1.3762 | 1.6412 |
| CUST_976_P14<br>16379584  | OR2B11 | 7.1754 | 6.6114 | 7.2898 | 6.4407 | 7.4128 | 6.1964 | 6.9804 | 6.5311 | 7.2863 | 6.9637 | 6.3699 | 6.2917 | 5.3698 | 6.4597 | 7.5657 | 5.3850 | 6.4845 | 5.8488 | 7.0648 | 6.5210 | 6.7417 | 6.8122 | 7.2713 | 6.0477 |
| A_23_P111088              | OR2B2  | 3.6072 | 2.3132 | 4.2254 | 4.5090 | 4.7398 | 2.0449 | 3.4951 | 3.9073 | 4.8576 | 4.0621 | 3.3873 | 1.9274 | 2.8874 | 3.5834 | 4.0409 | 3.4136 | 4.4191 | 2.4574 | 2.9562 | 2.1274 | 3.4284 | 3.2896 | 4.7769 | 2.5681 |
| CUST_1445_P1<br>416261804 | OR2B2  | 1.9088 | 2.2874 | 1.7370 | 1.4258 | 0.9797 | 2.1940 | 1.9488 | 1.7819 | 1.7712 | 0.7432 | 1.6882 | 1.9265 | 1.7490 | 2.0625 | 1.9350 | 1.3481 | 0.9049 | 1.9484 | 1.7562 | 1.9925 | 1.5825 | 1.4926 | 1.3299 | 1.6069 |
| CUST_1096_P1<br>416573500 | OR2B3  | 1.7582 | 2.0582 | 1.6549 | 1.2839 | 0.8482 | 3.2374 | 1.8461 | 1.6582 | 1.6407 | 0.7432 | 1.5706 | 1.7869 | 1.6950 | 1.9399 | 1.6742 | 1.2766 | 0.9485 | 1.5484 | 1.6452 | 1.8344 | 1.4917 | 1.2685 | 1.1933 | 1.4807 |
| CUST_1132_P1<br>416379584 | OR2B3  | 1.7401 | 2.2653 | 1.6241 | 1.2060 | 1.1451 | 2.0775 | 1.7807 | 1.8126 | 1.5074 | 0.8785 | 1.5465 | 1.9030 | 1.6512 | 2.0416 | 1.6469 | 1.2619 | 0.9004 | 1.6904 | 1.6744 | 2.1349 | 1.4436 | 1.2833 | 1.2722 | 1.5595 |
| A_23_P70468               | OR2B6  | 1.9895 | 2.3071 | 1.8022 | 1.2820 | 1.2292 | 1.9940 | 2.1242 | 1.8759 | 2.0416 | 0.7432 | 1.7847 | 2.0874 | 1.9904 | 2.0315 | 1.8451 | 1.3606 | 1.3205 | 1.8275 | 1.8880 | 2.1903 | 1.6234 | 1.9997 | 2.2039 | 1.7743 |
| CUST_1911_P1<br>416261804 | OR2B6  | 2.3421 | 2.5493 | 1.6368 | 1.2955 | 1.2259 | 1.8800 | 2.6324 | 2.1647 | 1.6063 | 0.7432 | 1.6268 | 1.7851 | 1.9628 | 2.0177 | 1.5746 | 1.5983 | 1.0816 | 1.6567 | 2.3167 | 1.8829 | 1.6105 | 1.2609 | 1.1903 | 1.9487 |

|                       |       |        |        |         |        |        |        |        |        |         |        |        |        |        |        |         |        |        |        |        |        |        |         |        |        |
|-----------------------|-------|--------|--------|---------|--------|--------|--------|--------|--------|---------|--------|--------|--------|--------|--------|---------|--------|--------|--------|--------|--------|--------|---------|--------|--------|
| A_23_P163737          | OR2C1 | 6.0477 | 1.9752 | 2.3471  | 1.5293 | 2.5033 | 1.8077 | 2.9921 | 3.0818 | 3.0380  | 1.0436 | 2.6584 | 2.6006 | 2.1622 | 3.1274 | 1.7027  | 2.8251 | 3.8568 | 2.5413 | 2.8348 | 2.4539 | 2.9476 | 1.2508  | 3.0842 | 2.5022 |
| CUST_1710_PI416261804 | OR2C1 | 2.8992 | 3.1810 | 4.0209  | 2.1872 | 4.8132 | 2.7317 | 4.1634 | 4.1056 | 4.5819  | 4.0349 | 3.9459 | 1.8857 | 3.0629 | 3.2550 | 4.1177  | 3.7682 | 3.5578 | 1.8510 | 2.6502 | 2.0281 | 4.3198 | 2.5239  | 4.3366 | 2.1524 |
| A_23_P115563          | OR2C3 | 1.9681 | 2.2914 | 1.6157  | 1.2392 | 1.0664 | 1.9415 | 2.1143 | 1.8152 | 1.5677  | 0.7432 | 1.7413 | 1.8903 | 1.7642 | 1.9729 | 1.6915  | 1.3064 | 1.1112 | 1.6843 | 1.8248 | 2.1275 | 1.5353 | 1.2802  | 1.3038 | 2.0933 |
| CUST_421_PI416573500  | OR2D2 | 2.0109 | 2.1339 | 1.8921  | 1.2925 | 1.0018 | 2.0041 | 2.1715 | 1.8760 | 1.8706  | 2.5623 | 2.0253 | 2.0174 | 1.8996 | 2.1187 | 4.4633  | 1.4549 | 1.1586 | 1.8018 | 1.8030 | 1.9580 | 1.5570 | 1.3845  | 1.2851 | 1.8338 |
| CUST_430_PI416379584  | OR2D2 | 3.2238 | 2.4571 | 2.7703  | 1.7039 | 2.3632 | 2.8854 | 3.5139 | 4.2204 | 2.5740  | 2.2694 | 2.0049 | 3.6109 | 3.5970 | 2.2643 | 1.7942  | 1.8082 | 3.1573 | 1.7740 | 2.9060 | 3.5163 | 3.1798 | 1.4839  | 1.7885 | 3.3509 |
| CUST_436_PI416573500  | OR2D3 | 1.8099 | 2.0964 | 2.0915  | 3.2677 | 1.1738 | 1.9502 | 1.9616 | 1.7060 | 1.5772  | 0.7432 | 1.5404 | 1.8433 | 1.7461 | 2.0050 | 1.7051  | 1.4650 | 1.0198 | 1.6555 | 1.7283 | 1.9383 | 1.5380 | 1.3402  | 1.0548 | 1.5340 |
| CUST_445_PI416379584  | OR2D3 | 2.8270 | 1.7974 | 2.4076  | 1.8521 | 1.9048 | 2.2508 | 2.8946 | 1.4395 | 2.4248  | 2.4886 | 2.2310 | 2.8036 | 1.8201 | 1.5420 | 1.4540  | 1.1494 | 0.7196 | 1.9898 | 2.2768 | 1.6467 | 3.3430 | 0.7688  | 2.4268 | 2.0398 |
| A_23_P8716            | OR2F1 | 2.0004 | 2.2738 | 2.4363  | 1.1817 | 3.0364 | 2.0622 | 2.0554 | 1.9212 | 2.0358  | 0.7432 | 1.6124 | 2.0002 | 1.9021 | 2.0250 | 1.6744  | 1.2812 | 1.9086 | 1.8186 | 1.8737 | 2.1013 | 1.8718 | 1.2604  | 2.6283 | 1.8703 |
| CUST_5751_PI416261804 | OR2F1 | 2.2608 | 2.0871 | 2.7939  | 1.1704 | 4.0514 | 1.8991 | 2.5553 | 1.8676 | 2.6865  | 2.2945 | 2.4023 | 2.2270 | 1.9660 | 2.0443 | 2.3869  | 1.4506 | 1.0116 | 1.7047 | 1.9648 | 1.9069 | 2.2136 | 1.3147  | 5.1648 | 2.0175 |
| CUST_13_PI417507815   | OR2F2 | 2.3132 | 2.2194 | 2.7184  | 1.5390 | 3.0063 | 2.3944 | 2.5127 | 2.7107 | 2.2832  | 0.8919 | 2.7016 | 2.0423 | 2.0000 | 2.2025 | 2.0889  | 1.4722 | 3.3018 | 1.9517 | 2.5761 | 1.9876 | 1.7563 | 1.8457  | 3.3101 | 1.9098 |
| CUST_591_PI416573500  | OR2G2 | 1.7274 | 2.0592 | 1.9260  | 1.2093 | 1.7627 | 1.9695 | 1.7640 | 1.6062 | 1.7353  | 0.7432 | 1.9302 | 1.8885 | 1.6804 | 1.9516 | 1.7774  | 1.2424 | 1.1395 | 1.6581 | 1.6821 | 1.9420 | 1.5064 | 1.2479  | 2.4478 | 1.6973 |
| CUST_607_PI416379584  | OR2G2 | 3.8804 | 3.2587 | 3.3284  | 4.1388 | 1.0956 | 2.8728 | 3.3122 | 2.7227 | 2.9714  | 0.7432 | 1.3466 | 2.8313 | 1.7820 | 3.4034 | 1.2790  | 1.2909 | 0.7795 | 3.2779 | 3.1202 | 3.3187 | 4.5433 | 3.1023  | 3.3234 | 4.6660 |
| CUST_136_PI416573500  | OR2G3 | 1.9879 | 2.6469 | 1.7974  | 2.1013 | 1.7234 | 1.8592 | 2.2353 | 1.8716 | 1.7011  | 1.1909 | 1.6698 | 1.9248 | 1.8426 | 2.0531 | 2.3255  | 1.4035 | 1.2208 | 1.7213 | 1.7815 | 1.9677 | 2.3934 | 1.2312  | 1.1949 | 1.8040 |
| CUST_141_PI416379584  | OR2G3 | 1.8228 | 1.8664 | 1.6073  | 0.9945 | 0.7825 | 1.8565 | 2.0810 | 1.5389 | 1.4191  | 0.7432 | 1.2760 | 1.4936 | 4.7528 | 1.5869 | 1.4196  | 1.0367 | 0.7630 | 1.4458 | 1.6782 | 1.7130 | 2.0682 | 0.9342  | 0.9731 | 2.5474 |
| CUST_459_PI416573500  | OR2G6 | 3.2515 | 2.2849 | 2.1840  | 2.7051 | 2.7942 | 1.7397 | 3.3553 | 2.6635 | 2.9726  | 3.8133 | 2.8734 | 1.8533 | 1.8362 | 2.2898 | 2.7168  | 1.3805 | 1.2991 | 1.7834 | 2.8721 | 3.4211 | 3.2371 | 1.0876  | 3.4229 | 2.3353 |
| CUST_469_PI416379584  | OR2G6 | 1.8079 | 1.9941 | 1.4209  | 0.9451 | 1.1315 | 1.6470 | 2.1056 | 1.9697 | 1.6004  | 0.7432 | 1.3753 | 1.6632 | 1.7257 | 1.7397 | 1.5589  | 1.1227 | 1.4265 | 1.8408 | 1.8909 | 2.7284 | 1.4186 | 1.4880  | 0.9813 | 2.4249 |
| A_23_P111092          | OR2H1 | 9.5472 | 8.8923 | 10.3272 | 9.6335 | 9.9758 | 8.7050 | 9.9908 | 8.7127 | 10.2799 | 9.8942 | 8.8389 | 8.6415 | 7.5909 | 9.0042 | 10.6430 | 8.4407 | 8.7488 | 8.6059 | 9.1329 | 8.6374 | 9.8942 | 10.3276 | 9.3230 | 8.2507 |
| A_24_P940897          | OR2H1 | 1.9953 | 3.7963 | 1.9152  | 2.7548 | 1.1337 | 3.8738 | 2.9317 | 1.7819 | 2.1068  | 2.7422 | 2.3104 | 1.8194 | 1.6248 | 3.5012 | 1.5434  | 1.5262 | 0.8646 | 1.9391 | 1.9659 | 4.2819 | 2.9465 | 1.3813  | 2.1960 | 2.8721 |
| A_23_P122485          | OR2H2 | 5.1678 | 2.5199 | 4.6849  | 3.9293 | 6.5675 | 3.4115 | 4.9808 | 5.9010 | 4.8033  | 5.1333 | 5.1428 | 1.9082 | 4.1801 | 5.6849 | 4.6750  | 4.1717 | 4.4211 | 3.2816 | 5.0687 | 3.2464 | 4.7255 | 5.0094  | 5.9659 | 3.2751 |
| A_23_P307274          | OR2H2 | 2.2057 | 1.9658 | 2.3849  | 0.9699 | 3.3996 | 1.5485 | 2.6315 | 1.6627 | 2.5791  | 0.7432 | 1.5943 | 1.7168 | 2.1825 | 1.8731 | 1.9769  | 1.3316 | 1.1735 | 1.6069 | 1.9223 | 1.8091 | 3.1778 | 0.9638  | 2.9396 | 1.9140 |
| A_23_P19428           | OR2J2 | 1.6086 | 1.9139 | 1.6209  | 1.0821 | 0.8912 | 1.7197 | 1.6596 | 1.4825 | 1.4777  | 0.7432 | 1.2587 | 1.6842 | 1.5542 | 1.7688 | 1.7023  | 1.1529 | 0.7591 | 1.4697 | 1.5747 | 1.7507 | 1.4579 | 1.0904  | 1.5446 | 1.4300 |
| CUST_6419_PI416261804 | OR2J2 | 1.6541 | 1.7899 | 1.4099  | 0.9938 | 0.7737 | 1.7028 | 1.7243 | 1.4089 | 1.4225  | 0.7432 | 1.1439 | 1.5820 | 1.6064 | 1.6465 | 1.5526  | 0.9763 | 0.7095 | 1.4941 | 1.6021 | 1.6438 | 1.4130 | 1.0642  | 0.9539 | 1.4756 |
| CUST_692_PI416573500  | OR2J3 | 1.6691 | 1.8089 | 2.3241  | 1.5359 | 2.9022 | 1.7764 | 1.7520 | 1.3964 | 2.0278  | 0.8652 | 1.0752 | 1.5747 | 1.5846 | 1.6506 | 1.9942  | 1.1953 | 0.6745 | 1.4863 | 1.6177 | 1.6220 | 1.4110 | 1.1158  | 2.3469 | 1.4588 |
| CUST_717_PI416379584  | OR2J3 | 1.7607 | 2.0845 | 1.5237  | 1.1535 | 0.9433 | 1.8902 | 1.8643 | 1.7109 | 1.5288  | 0.7432 | 1.4891 | 1.7133 | 1.6598 | 1.8474 | 1.6031  | 1.1675 | 0.8503 | 1.5534 | 1.6561 | 1.9229 | 1.4131 | 1.2167  | 1.1516 | 1.5198 |

|                           |        |        |        |        |        |        |        |        |        |        |        |        |        |        |        |        |        |        |        |        |        |        |        |        |        |
|---------------------------|--------|--------|--------|--------|--------|--------|--------|--------|--------|--------|--------|--------|--------|--------|--------|--------|--------|--------|--------|--------|--------|--------|--------|--------|--------|
| CUST_157_Pi4<br>16573500  | OR2K2  | 1.7338 | 2.2756 | 1.8457 | 1.1275 | 0.8303 | 1.8617 | 1.8621 | 1.8075 | 1.8978 | 0.7432 | 1.5291 | 1.9031 | 1.7444 | 1.9397 | 1.7224 | 1.5835 | 1.0975 | 1.7395 | 1.7011 | 2.0353 | 1.5369 | 1.1314 | 1.9251 | 1.6406 |
| CUST_162_Pi4<br>16379584  | OR2K2  | 2.1914 | 2.3456 | 1.4927 | 1.2311 | 0.8356 | 2.7589 | 2.5394 | 2.6077 | 1.4446 | 0.7432 | 2.2440 | 1.8348 | 1.8916 | 1.9432 | 1.6182 | 1.1475 | 2.6371 | 1.7684 | 2.0697 | 2.7958 | 1.9445 | 1.1862 | 1.6436 | 3.0898 |
| A_23_P370786              | OR2L13 | 2.7939 | 2.9999 | 3.5958 | 3.5102 | 4.3891 | 3.2386 | 3.0616 | 4.3656 | 3.5705 | 3.8132 | 3.9899 | 3.3633 | 3.3975 | 3.3833 | 3.0083 | 2.6274 | 4.0098 | 3.2324 | 2.6150 | 2.2486 | 3.7267 | 3.7202 | 4.0043 | 4.7390 |
| CUST_1599_Pi<br>416261804 | OR2L13 | 3.6517 | 4.0883 | 2.8961 | 2.4320 | 2.9228 | 2.8354 | 3.6268 | 4.5428 | 1.7703 | 1.9377 | 3.3837 | 1.9354 | 3.6002 | 3.9892 | 1.6669 | 1.3470 | 3.4104 | 2.4851 | 3.6517 | 4.6313 | 2.1319 | 1.2915 | 2.2458 | 2.5267 |
| CUST_191_Pi4<br>16573500  | OR2L2  | 2.7955 | 3.0079 | 2.3738 | 1.1558 | 2.8555 | 2.0504 | 3.8673 | 3.3552 | 1.9276 | 3.1596 | 2.7334 | 1.6625 | 2.2014 | 2.2695 | 1.9457 | 1.0419 | 2.3580 | 2.1512 | 2.4977 | 2.8237 | 2.7467 | 1.9200 | 2.8103 | 4.6755 |
| CUST_196_Pi4<br>16379584  | OR2L2  | 3.6055 | 4.7160 | 3.6775 | 3.2953 | 4.4453 | 3.9810 | 3.8671 | 4.4904 | 3.3424 | 4.1657 | 3.0024 | 3.5261 | 3.5406 | 4.8146 | 2.5768 | 3.0862 | 3.6922 | 3.1760 | 3.4185 | 5.1676 | 3.3727 | 2.2994 | 4.7330 | 3.3696 |
| CUST_171_Pi4<br>16379584  | OR2L3  | 6.3308 | 7.7155 | 5.5855 | 5.6080 | 6.5338 | 6.0187 | 6.8139 | 7.5552 | 5.4516 | 5.3850 | 6.1339 | 5.4364 | 6.4627 | 7.7507 | 5.5933 | 4.5809 | 6.1662 | 5.2993 | 7.0144 | 7.4487 | 5.5010 | 4.2668 | 7.0697 | 6.8584 |
| CUST_222_Pi4<br>16573500  | OR2L3  | 3.2476 | 3.6347 | 3.3479 | 1.9437 | 2.9815 | 2.4825 | 3.4368 | 4.3999 | 2.8706 | 4.0516 | 3.0312 | 3.5108 | 2.7299 | 2.1519 | 3.1174 | 2.2364 | 3.6769 | 2.2647 | 3.2261 | 4.6756 | 2.9573 | 1.8593 | 3.9231 | 3.8351 |
| CUST_166_Pi4<br>16573500  | OR2L8  | 3.7904 | 2.9769 | 3.8292 | 3.3494 | 3.5357 | 4.0410 | 4.2221 | 4.5937 | 3.4020 | 3.9024 | 3.9056 | 2.4347 | 3.7507 | 3.6468 | 3.2507 | 2.8906 | 4.0941 | 3.8156 | 3.4493 | 5.0032 | 3.5068 | 2.2691 | 3.4432 | 4.8606 |
| A_32_P310503              | OR2M1P | 1.6422 | 1.9542 | 1.8163 | 1.1048 | 2.7103 | 1.7962 | 1.7119 | 1.6267 | 1.5464 | 0.7432 | 1.3273 | 1.7034 | 1.6122 | 1.8191 | 1.6406 | 1.1017 | 0.7196 | 1.5167 | 1.5786 | 1.7499 | 1.3905 | 1.1334 | 0.9628 | 1.4612 |
| CUST_7141_Pi<br>416261804 | OR2M1P | 3.5431 | 4.8120 | 3.4660 | 3.7764 | 4.7071 | 3.6730 | 3.8708 | 5.1334 | 3.8250 | 3.7936 | 4.1864 | 1.9939 | 3.3122 | 5.0299 | 3.1512 | 3.0765 | 3.8734 | 1.8678 | 3.0866 | 5.0572 | 4.1938 | 3.0247 | 4.5147 | 2.9569 |
| CUST_1669_Pi<br>416261804 | OR2M2  | 2.3548 | 2.1603 | 3.2555 | 2.6220 | 3.4551 | 2.0673 | 2.4385 | 1.6856 | 3.0055 | 2.5252 | 3.1155 | 1.9014 | 2.1754 | 2.0797 | 2.7152 | 1.4770 | 3.7580 | 1.7714 | 2.0253 | 1.9729 | 2.0233 | 1.4960 | 4.0440 | 1.7437 |
| CUST_1114_Pi<br>416573500 | OR2M3  | 1.8763 | 2.3993 | 2.7504 | 1.6965 | 4.4777 | 2.1339 | 1.9553 | 1.8796 | 3.2815 | 1.2081 | 3.0793 | 2.1136 | 1.7714 | 2.2243 | 3.4000 | 1.4500 | 2.5003 | 1.8747 | 2.4180 | 2.5308 | 2.6220 | 1.5858 | 4.1042 | 1.6127 |
| CUST_1151_Pi<br>416379584 | OR2M3  | 2.4244 | 2.0923 | 2.9412 | 1.3801 | 3.9905 | 1.9846 | 2.7070 | 3.2959 | 3.4938 | 3.5722 | 3.3338 | 1.8496 | 2.7898 | 2.0222 | 3.2164 | 2.0543 | 3.5849 | 1.7004 | 2.3485 | 1.8564 | 3.5624 | 1.4041 | 4.1893 | 1.7121 |
| CUST_317_Pi4<br>16573500  | OR2M4  | 1.8049 | 2.0108 | 1.7682 | 1.1673 | 1.8218 | 1.8609 | 1.9009 | 1.5481 | 1.5558 | 0.7432 | 1.4063 | 1.7809 | 1.7043 | 1.8567 | 1.7083 | 1.1453 | 2.4973 | 1.6723 | 1.7282 | 1.8805 | 1.4884 | 1.2355 | 1.8300 | 1.5749 |
| CUST_326_Pi4<br>16379584  | OR2M4  | 3.7455 | 5.3568 | 2.6663 | 1.4148 | 3.6055 | 2.7723 | 4.8988 | 5.0403 | 2.2475 | 2.4605 | 4.3082 | 3.4356 | 3.3588 | 5.1004 | 1.4582 | 2.7795 | 3.3589 | 2.2310 | 4.1901 | 5.4984 | 2.9615 | 2.3013 | 4.3033 | 4.2562 |
| CUST_61_Pi41<br>6379584   | OR2M5  | 1.7113 | 3.0131 | 1.4314 | 1.0385 | 1.3636 | 2.3326 | 1.8984 | 2.9968 | 1.9597 | 0.7432 | 2.4764 | 1.6142 | 2.1356 | 1.7745 | 1.6173 | 1.0067 | 2.7292 | 1.5262 | 1.5910 | 1.6259 | 2.1843 | 1.0929 | 2.0413 | 1.4689 |
| CUST_324_Pi4<br>16379584  | OR2M7  | 7.1999 | 5.7813 | 5.9641 | 4.7445 | 6.5079 | 5.7672 | 7.3514 | 6.7473 | 6.1527 | 5.7009 | 5.9472 | 4.4895 | 4.9104 | 6.1563 | 4.9547 | 5.0174 | 5.0612 | 4.0651 | 6.7011 | 4.9763 | 6.5845 | 4.7926 | 6.3608 | 4.8213 |
| CUST_57_Pi41<br>6573500   | OR2M7  | 2.6717 | 2.2253 | 3.3485 | 2.7848 | 4.1503 | 2.3331 | 2.9858 | 3.9635 | 3.4453 | 3.3219 | 3.3303 | 1.9336 | 2.6990 | 2.6333 | 3.1194 | 1.4825 | 3.2265 | 2.2098 | 2.6928 | 3.0460 | 2.9395 | 3.1956 | 4.6531 | 3.3277 |
| A_23_P135007              | OR2S2  | 1.7955 | 2.1248 | 1.8139 | 1.3888 | 2.3942 | 1.9977 | 2.1650 | 1.6690 | 1.7390 | 1.0180 | 1.6220 | 1.9662 | 1.8242 | 2.1266 | 1.9101 | 1.5961 | 1.2221 | 1.9342 | 2.3621 | 1.9784 | 3.9313 | 1.4500 | 1.0564 | 1.5329 |
| CUST_6600_Pi<br>416261804 | OR2S2  | 2.4159 | 2.2914 | 1.9002 | 1.0781 | 2.5926 | 1.6761 | 2.2849 | 2.7434 | 2.1364 | 1.1110 | 1.9969 | 2.5984 | 2.3367 | 1.7903 | 1.9221 | 1.1789 | 1.8545 | 2.4993 | 1.8192 | 1.9479 | 2.9448 | 1.0546 | 2.9135 | 1.8282 |
| CUST_188_Pi4<br>16573500  | OR2T1  | 2.0397 | 2.1639 | 1.7012 | 1.2858 | 1.2378 | 1.9240 | 2.2746 | 1.9069 | 1.6653 | 0.7432 | 1.7222 | 1.9745 | 1.8611 | 2.1004 | 1.6897 | 1.5403 | 1.1681 | 1.7145 | 1.8304 | 1.9897 | 1.6029 | 1.3207 | 1.2471 | 1.8195 |

|                          |        |        |        |        |        |        |        |        |        |        |        |        |        |        |        |        |        |        |        |        |        |        |        |        |        |
|--------------------------|--------|--------|--------|--------|--------|--------|--------|--------|--------|--------|--------|--------|--------|--------|--------|--------|--------|--------|--------|--------|--------|--------|--------|--------|--------|
| CUST_193_Pi4<br>16379584 | OR2T1  | 2.8074 | 2.1011 | 3.5922 | 2.0589 | 4.7338 | 2.1411 | 3.2257 | 3.2153 | 3.9741 | 3.9094 | 3.5009 | 1.8295 | 3.0156 | 2.6169 | 3.1623 | 1.1938 | 3.5439 | 1.9261 | 2.4899 | 1.8411 | 3.6849 | 2.6875 | 5.2001 | 2.2768 |
| CUST_383_Pi4<br>16573500 | OR2T10 | 2.0555 | 2.3084 | 2.0267 | 1.7562 | 1.5618 | 2.3252 | 1.9028 | 2.5267 | 1.8467 | 2.2801 | 1.7864 | 2.1909 | 2.1783 | 2.2976 | 1.9889 | 1.8497 | 2.2199 | 1.8114 | 1.9065 | 2.1383 | 1.7160 | 1.7550 | 2.8054 | 1.5323 |
| CUST_392_Pi4<br>16379584 | OR2T10 | 1.9664 | 2.2496 | 1.6301 | 1.2398 | 2.2833 | 1.9784 | 2.1502 | 1.9958 | 1.5471 | 0.7432 | 1.7017 | 1.9756 | 3.0625 | 2.0342 | 1.7077 | 1.3604 | 1.0954 | 1.7372 | 1.7803 | 2.0894 | 1.4808 | 1.2457 | 1.2724 | 1.9199 |
| CUST_321_Pi4<br>16573500 | OR2T11 | 1.8050 | 1.9781 | 2.4225 | 1.6027 | 3.0344 | 1.9209 | 2.1978 | 2.5648 | 2.4619 | 0.8618 | 1.3490 | 1.8050 | 1.7237 | 1.8646 | 1.7400 | 1.1174 | 0.7692 | 1.7264 | 1.7413 | 1.8545 | 1.9676 | 1.7744 | 2.8436 | 1.6094 |
| CUST_330_Pi4<br>16379584 | OR2T11 | 1.8152 | 2.3005 | 1.6804 | 1.3199 | 1.2563 | 2.0862 | 1.8734 | 1.8466 | 1.6326 | 1.2034 | 1.7517 | 2.0005 | 1.7046 | 2.0578 | 1.7777 | 1.3344 | 1.1035 | 1.7645 | 1.7311 | 2.1700 | 1.4799 | 1.3743 | 1.3428 | 1.6200 |
| CUST_233_Pi4<br>16379584 | OR2T12 | 2.9627 | 3.4805 | 3.6749 | 3.6827 | 5.1130 | 3.1562 | 3.2363 | 4.3889 | 3.8354 | 4.5510 | 4.2733 | 2.0074 | 3.0210 | 4.4413 | 3.5085 | 3.5360 | 4.1659 | 1.7622 | 2.5494 | 3.2273 | 3.1352 | 2.7663 | 4.5574 | 1.7416 |
| CUST_141_Pi4<br>16573500 | OR2T2  | 1.9220 | 2.2157 | 2.0975 | 1.4332 | 1.2925 | 2.1211 | 2.0605 | 1.8228 | 1.6951 | 0.7432 | 1.8487 | 1.9974 | 1.8242 | 2.1586 | 1.7469 | 1.6401 | 1.1436 | 1.7472 | 1.7887 | 2.0380 | 1.6276 | 1.5587 | 1.1966 | 1.6508 |
| CUST_146_Pi4<br>16379584 | OR2T2  | 1.9511 | 3.0619 | 3.1779 | 2.7229 | 1.8938 | 4.2686 | 1.7372 | 1.5856 | 3.3262 | 0.7432 | 3.4385 | 1.7733 | 2.0979 | 2.4063 | 2.6522 | 1.1657 | 3.6194 | 1.8472 | 2.2555 | 2.6946 | 2.9789 | 3.8552 | 1.0682 | 2.5749 |
| CUST_308_Pi4<br>16573500 | OR2T27 | 2.2113 | 2.0721 | 1.8875 | 1.4372 | 1.2625 | 2.1907 | 2.4540 | 1.6582 | 1.9689 | 0.7432 | 1.5067 | 1.8828 | 2.0110 | 2.0736 | 1.6596 | 1.5122 | 1.0589 | 1.8228 | 2.0831 | 1.8949 | 1.7287 | 1.6048 | 1.4190 | 1.8459 |
| CUST_316_Pi4<br>16379584 | OR2T27 | 3.0239 | 2.0923 | 3.3303 | 2.7728 | 3.3096 | 1.6243 | 3.9417 | 2.5509 | 3.7207 | 3.5168 | 4.4844 | 1.6308 | 2.1800 | 1.9942 | 2.7900 | 2.6367 | 3.1366 | 1.6471 | 2.5082 | 3.2634 | 2.5238 | 3.3681 | 3.9036 | 2.3287 |
| CUST_226_Pi4<br>16573500 | OR2T33 | 2.6897 | 2.2074 | 2.0343 | 1.4145 | 1.3088 | 2.1703 | 3.0406 | 1.7751 | 1.7739 | 0.7432 | 1.5851 | 1.9445 | 2.4824 | 2.1281 | 1.6721 | 2.3170 | 1.0601 | 1.7639 | 2.7229 | 2.0050 | 1.6380 | 1.5824 | 1.3123 | 1.7612 |
| CUST_274_Pi4<br>16573500 | OR2T33 | 4.1399 | 2.2679 | 4.2413 | 3.1739 | 4.7397 | 2.0403 | 4.0846 | 2.3683 | 4.1407 | 4.1669 | 3.9602 | 1.8795 | 3.0588 | 2.8227 | 3.8532 | 3.0465 | 3.9448 | 2.3534 | 3.9306 | 1.9941 | 3.8206 | 3.7856 | 4.4992 | 3.0643 |
| CUST_282_Pi4<br>16379584 | OR2T33 | 1.8958 | 2.0828 | 1.6163 | 1.2967 | 1.9820 | 1.9889 | 2.0194 | 1.6127 | 1.9939 | 0.7432 | 1.4512 | 1.8034 | 1.7251 | 1.9280 | 1.6338 | 1.2102 | 0.7931 | 1.5983 | 1.7839 | 1.7873 | 1.5390 | 1.3253 | 2.3693 | 1.6433 |
| CUST_250_Pi4<br>16573500 | OR2T34 | 2.1567 | 3.6003 | 3.1457 | 2.4898 | 3.4368 | 2.4715 | 2.6286 | 3.3083 | 3.2096 | 2.5529 | 3.1023 | 1.7858 | 1.8275 | 3.8395 | 1.7815 | 1.2580 | 2.7777 | 2.1498 | 2.4369 | 3.1533 | 3.0096 | 1.4219 | 4.1699 | 1.6143 |
| CUST_258_Pi4<br>16379584 | OR2T34 | 2.1667 | 3.5436 | 1.8609 | 1.7825 | 2.1928 | 3.0966 | 3.5997 | 2.6635 | 1.8127 | 2.7747 | 1.7070 | 2.0178 | 2.5531 | 3.5280 | 1.8417 | 1.3315 | 1.2592 | 1.8790 | 2.1450 | 2.9170 | 2.4820 | 3.1219 | 2.6583 | 2.8419 |
| CUST_384_Pi4<br>16573500 | OR2T4  | 1.5787 | 1.8325 | 1.4340 | 0.9785 | 0.8081 | 1.6182 | 4.4337 | 1.4419 | 1.5303 | 0.7432 | 1.1977 | 1.5996 | 1.5450 | 1.6632 | 1.6327 | 1.0546 | 0.7515 | 1.4333 | 1.5431 | 1.6896 | 1.4050 | 0.9801 | 0.8661 | 1.4224 |
| CUST_393_Pi4<br>16379584 | OR2T4  | 2.8822 | 1.9390 | 3.2955 | 1.0243 | 2.8778 | 1.7510 | 3.0228 | 2.8099 | 3.5191 | 0.7432 | 2.5347 | 1.8056 | 1.9485 | 1.7609 | 2.5540 | 1.6123 | 0.6954 | 1.6693 | 2.4350 | 2.2074 | 3.3312 | 2.1916 | 3.0612 | 2.3214 |
| A_24_P281439             | OR2T5  | 2.4796 | 2.4688 | 3.4460 | 2.1833 | 3.2406 | 2.6832 | 2.3000 | 3.8934 | 3.8693 | 2.9409 | 3.6255 | 1.5475 | 1.9095 | 2.0797 | 2.3717 | 1.5813 | 1.5023 | 1.7081 | 1.8713 | 2.8440 | 3.0996 | 2.4763 | 2.7902 | 1.6804 |
| CUST_774_Pi4<br>16261804 | OR2T5  | 1.5435 | 1.9420 | 1.4798 | 1.0046 | 0.8879 | 1.5779 | 1.6170 | 1.5516 | 1.5185 | 0.7432 | 1.3783 | 1.6603 | 1.5248 | 1.7301 | 1.7232 | 1.1704 | 0.8774 | 1.4211 | 1.5203 | 1.8136 | 1.4249 | 0.9393 | 2.4713 | 1.4117 |
| CUST_334_Pi4<br>16573500 | OR2T6  | 1.8242 | 2.0612 | 1.6724 | 1.1553 | 1.0360 | 2.1734 | 1.9538 | 2.5097 | 2.0815 | 0.7432 | 3.3449 | 1.7675 | 1.7221 | 1.8627 | 1.8914 | 1.9704 | 1.7499 | 1.6392 | 1.7303 | 1.9280 | 1.4883 | 1.1993 | 2.5261 | 1.6023 |
| CUST_343_Pi4<br>16379584 | OR2T6  | 6.2234 | 6.1423 | 6.6122 | 6.7836 | 7.5495 | 5.2279 | 6.7741 | 6.9153 | 6.7591 | 7.1632 | 6.9597 | 4.6231 | 4.8931 | 6.4016 | 5.8940 | 5.4637 | 6.0354 | 4.2546 | 6.8188 | 6.2453 | 5.9893 | 6.9341 | 7.9929 | 4.5440 |
| A_24_P298724             | OR2T8  | 1.7010 | 2.3683 | 1.6063 | 1.2138 | 1.0904 | 1.8807 | 1.7761 | 1.6122 | 1.7874 | 0.7432 | 1.4262 | 1.8540 | 1.6484 | 1.9487 | 1.6996 | 1.2925 | 0.8442 | 1.5576 | 1.7173 | 1.9053 | 1.4888 | 1.2259 | 1.0999 | 2.1482 |
| CUST_413_Pi4<br>16261804 | OR2T8  | 2.0485 | 2.1889 | 1.6734 | 1.3291 | 2.4094 | 2.1079 | 2.2338 | 2.3866 | 1.6569 | 0.7432 | 2.1308 | 1.8208 | 1.7720 | 1.9942 | 1.7164 | 1.2954 | 1.0449 | 1.6580 | 1.8586 | 2.0089 | 1.9654 | 1.3548 | 1.3371 | 1.6759 |
| A_23_P18913              | OR2V2  | 1.8888 | 2.1966 | 1.8298 | 1.1737 | 1.3940 | 1.8984 | 2.0456 | 1.7672 | 2.1721 | 0.7432 | 1.6993 | 1.9265 | 4.2606 | 1.9735 | 1.7667 | 1.3166 | 2.1132 | 1.7529 | 1.8007 | 2.1442 | 1.5103 | 1.1847 | 1.3574 | 1.7418 |

|                           |        |        |        |        |        |        |        |        |        |        |        |        |        |        |        |        |        |        |        |        |        |        |        |        |        |
|---------------------------|--------|--------|--------|--------|--------|--------|--------|--------|--------|--------|--------|--------|--------|--------|--------|--------|--------|--------|--------|--------|--------|--------|--------|--------|--------|
| CUST_1633_PI<br>416261804 | OR2V2  | 2.6373 | 1.9941 | 3.5303 | 1.8892 | 4.1640 | 1.8651 | 3.3877 | 2.6930 | 3.0595 | 2.9064 | 2.3483 | 1.9492 | 2.1857 | 2.0276 | 2.8082 | 1.3685 | 3.1697 | 1.8156 | 2.4698 | 1.7759 | 3.6910 | 3.8415 | 4.3436 | 2.2809 |
| A_23_P255389              | OR2W1  | 1.7867 | 2.1197 | 1.6580 | 1.2882 | 1.6916 | 1.9537 | 1.8610 | 1.6421 | 1.6383 | 0.7432 | 1.6423 | 1.8455 | 1.7162 | 1.9368 | 1.6579 | 1.2809 | 0.9111 | 1.5916 | 1.6974 | 1.8339 | 1.5312 | 1.2847 | 1.1962 | 1.4962 |
| CUST_6437_PI<br>416261804 | OR2W1  | 1.7528 | 2.1746 | 1.6425 | 1.3861 | 1.0819 | 2.1276 | 1.8065 | 1.7205 | 1.5579 | 0.7432 | 1.4906 | 1.8808 | 1.6511 | 2.0573 | 1.5633 | 1.3958 | 0.7632 | 1.6200 | 1.7084 | 1.9350 | 1.5159 | 1.4655 | 1.0991 | 1.4548 |
| A_24_P333993              | OR2W3  | 1.9963 | 2.5330 | 2.4206 | 1.9024 | 3.6997 | 2.5108 | 1.9532 | 1.8829 | 2.5255 | 1.7550 | 2.7494 | 2.3127 | 3.2014 | 2.3838 | 2.1357 | 1.6012 | 1.5491 | 1.9542 | 1.8381 | 3.0081 | 2.2108 | 1.9316 | 2.2380 | 1.6345 |
| CUST_1659_PI<br>416261804 | OR2W3  | 4.4108 | 2.7296 | 4.9264 | 4.0411 | 5.2922 | 2.9219 | 4.5715 | 3.8912 | 5.2386 | 4.8528 | 4.3385 | 3.3200 | 3.2164 | 2.1053 | 5.0798 | 3.8750 | 4.4855 | 4.3719 | 4.1109 | 2.7689 | 4.5689 | 4.4712 | 4.9074 | 3.6903 |
| CUST_752_PI4<br>16573500  | OR2W5  | 5.9412 | 4.3690 | 6.8530 | 4.7581 | 6.7634 | 4.5283 | 5.5377 | 4.9574 | 6.8002 | 5.3195 | 5.5229 | 5.0463 | 4.1484 | 5.3607 | 6.9478 | 4.1815 | 5.6801 | 4.0300 | 5.1250 | 4.5115 | 6.3014 | 5.3817 | 5.4583 | 4.2652 |
| CUST_778_PI4<br>16379584  | OR2W5  | 2.1175 | 2.0373 | 2.6319 | 1.2309 | 2.6280 | 1.9680 | 2.3409 | 1.5509 | 2.0510 | 1.1847 | 2.3852 | 1.7809 | 1.9729 | 1.8760 | 1.6764 | 2.9648 | 2.4490 | 1.8130 | 1.9843 | 1.8982 | 1.6809 | 1.3472 | 2.0554 | 1.8160 |
| CUST_392_PI4<br>16573500  | OR2Y1  | 1.9029 | 1.8352 | 2.6808 | 1.7522 | 1.4039 | 1.5994 | 2.1682 | 1.4472 | 2.6143 | 2.0607 | 1.7211 | 1.5745 | 1.6900 | 1.6310 | 2.0373 | 1.0523 | 1.8411 | 1.4747 | 1.7589 | 1.6926 | 2.6110 | 0.9511 | 3.1139 | 1.9487 |
| CUST_401_PI4<br>16379584  | OR2Y1  | 3.8048 | 2.4574 | 3.3029 | 2.6760 | 3.1469 | 1.7657 | 3.4793 | 3.5483 | 3.2544 | 3.2565 | 4.4756 | 1.5581 | 2.2197 | 3.8462 | 1.9861 | 2.3567 | 0.6745 | 1.8255 | 2.9619 | 2.7586 | 3.0545 | 1.7534 | 3.7610 | 4.3802 |
| CUST_1020_PI<br>416573500 | OR2Z1  | 6.1566 | 4.8719 | 6.8540 | 6.1793 | 6.8174 | 5.5704 | 5.2585 | 6.1896 | 6.8290 | 6.8149 | 5.7229 | 6.1478 | 4.8317 | 5.9820 | 6.9696 | 5.4821 | 5.7851 | 6.1474 | 6.0316 | 4.5378 | 6.4395 | 6.2139 | 5.8954 | 5.6616 |
| CUST_1052_PI<br>416379584 | OR2Z1  | 2.0828 | 2.2037 | 2.7765 | 0.9234 | 0.8478 | 4.1383 | 2.4969 | 1.7796 | 2.4012 | 0.7432 | 1.6861 | 1.7697 | 1.8916 | 1.8286 | 1.6991 | 1.3020 | 3.3260 | 1.5910 | 1.9149 | 1.9982 | 3.3668 | 0.7550 | 1.9249 | 1.9633 |
| A_23_P50031               | OR3A1  | 2.0501 | 2.1624 | 1.5640 | 1.2069 | 0.8956 | 1.9742 | 2.2682 | 1.8119 | 1.6386 | 1.1212 | 1.7155 | 1.8880 | 1.9613 | 1.9731 | 1.6702 | 1.2038 | 0.9822 | 1.7852 | 2.1181 | 1.9521 | 1.5178 | 1.2647 | 1.2548 | 1.8042 |
| CUST_5004_PI<br>416261804 | OR3A1  | 8.7383 | 7.1093 | 7.7320 | 6.9569 | 7.9932 | 6.7705 | 8.7300 | 7.3733 | 7.9958 | 7.6597 | 7.3550 | 6.3765 | 6.5257 | 7.6338 | 7.7570 | 6.0714 | 7.2659 | 6.5411 | 8.6602 | 6.8188 | 7.7164 | 7.0831 | 8.6633 | 6.4448 |
| A_23_P55504               | OR3A2  | 2.0484 | 2.3402 | 1.8783 | 1.3914 | 2.2332 | 2.2922 | 2.3968 | 1.9722 | 1.7070 | 2.0954 | 1.4001 | 2.0475 | 2.8010 | 4.1207 | 1.7816 | 2.7910 | 3.3849 | 2.0429 | 2.0051 | 2.4310 | 1.6798 | 1.6267 | 2.5466 | 1.9496 |
| CUST_5404_PI<br>416261804 | OR3A2  | 4.4227 | 2.1508 | 4.9175 | 4.8497 | 4.7919 | 4.3742 | 4.4083 | 3.8495 | 4.6863 | 4.5835 | 3.4481 | 2.9754 | 3.6055 | 4.0676 | 4.8010 | 3.2901 | 4.0211 | 3.7035 | 4.3620 | 2.7121 | 4.4721 | 2.6043 | 4.8165 | 3.6134 |
| A_23_P107483              | OR3A3  | 2.9552 | 2.1196 | 4.2084 | 2.2343 | 5.8559 | 3.2742 | 3.7460 | 1.8978 | 4.4490 | 3.6253 | 3.6609 | 2.0434 | 2.4350 | 2.2660 | 3.5848 | 1.4764 | 3.9986 | 2.0567 | 3.4430 | 1.8910 | 4.0432 | 1.6066 | 5.4693 | 2.4720 |
| CUST_2232_PI<br>416261804 | OR3A3  | 6.6749 | 5.5315 | 6.8141 | 6.1209 | 6.8599 | 4.8785 | 7.2895 | 6.4602 | 6.9589 | 6.5562 | 5.8575 | 5.5898 | 5.2292 | 6.3254 | 7.3456 | 5.2451 | 5.8722 | 5.4207 | 6.9051 | 5.4838 | 6.4901 | 6.2349 | 6.5366 | 4.7827 |
| A_23_P139099              | OR4A15 | 3.6896 | 2.4384 | 4.1941 | 3.6981 | 5.6001 | 2.0719 | 3.7131 | 4.4192 | 4.7630 | 4.6008 | 4.5023 | 2.0173 | 2.8166 | 3.6061 | 3.6491 | 3.1156 | 4.2930 | 1.9648 | 2.9974 | 2.8427 | 3.8651 | 2.8992 | 5.5962 | 2.3466 |
| CUST_1565_PI<br>416261804 | OR4A15 | 2.0179 | 2.1532 | 1.7839 | 1.5228 | 1.3646 | 2.1718 | 2.1494 | 1.7576 | 2.2107 | 0.7432 | 1.7692 | 1.9460 | 1.8856 | 2.1505 | 1.7259 | 1.6461 | 1.1111 | 1.7672 | 1.9151 | 1.9350 | 1.6663 | 1.5858 | 1.2235 | 1.6494 |
| CUST_139_PI4<br>16573500  | OR4A16 | 1.7073 | 2.0855 | 1.9569 | 1.2742 | 2.3468 | 1.8360 | 1.8310 | 1.7618 | 1.9883 | 2.0445 | 1.5352 | 1.8512 | 1.6956 | 1.9555 | 1.8568 | 1.2404 | 1.0290 | 1.6633 | 1.6317 | 1.8893 | 1.4431 | 1.1848 | 2.3239 | 1.5547 |
| CUST_144_PI4<br>16379584  | OR4A16 | 2.3215 | 2.4350 | 1.5352 | 2.4387 | 0.9694 | 1.9483 | 2.4840 | 1.7448 | 1.6742 | 0.9066 | 1.6463 | 1.8828 | 1.7655 | 2.2408 | 2.1893 | 1.2038 | 0.9658 | 1.6945 | 1.8778 | 2.2781 | 1.7835 | 2.7964 | 2.6283 | 1.8582 |

|                           |        |        |        |        |        |        |        |        |        |        |        |        |        |        |        |        |        |        |        |        |        |        |        |        |        |
|---------------------------|--------|--------|--------|--------|--------|--------|--------|--------|--------|--------|--------|--------|--------|--------|--------|--------|--------|--------|--------|--------|--------|--------|--------|--------|--------|
| CUST_375_Pi4<br>16573500  | OR4A47 | 2.5066 | 2.1760 | 3.6878 | 3.5493 | 4.8107 | 1.9459 | 2.7606 | 4.0098 | 4.1515 | 4.8077 | 3.9988 | 1.7573 | 1.9708 | 2.1458 | 2.6484 | 3.0230 | 4.1002 | 1.8406 | 2.3722 | 2.6014 | 4.0391 | 3.9470 | 3.7314 | 2.4990 |
| CUST_384_Pi4<br>16379584  | OR4A47 | 2.9863 | 2.2837 | 2.3354 | 1.3477 | 1.7785 | 2.1378 | 2.7489 | 2.5439 | 1.6016 | 2.7731 | 1.6091 | 1.8463 | 1.9422 | 3.2668 | 1.5958 | 1.6392 | 1.1206 | 2.0236 | 2.1071 | 2.5439 | 2.5129 | 3.2124 | 1.4663 | 3.6624 |
| CUST_224_Pi4<br>16573500  | OR4A5  | 2.1038 | 2.1841 | 1.8079 | 1.4795 | 1.9945 | 2.1371 | 2.2988 | 1.7955 | 1.8102 | 0.7432 | 2.5274 | 1.9485 | 1.9506 | 2.1583 | 1.7521 | 1.6711 | 2.1533 | 1.7444 | 1.9677 | 1.9634 | 1.8387 | 1.5206 | 2.2712 | 1.7935 |
| CUST_230_Pi4<br>16379584  | OR4A5  | 1.6680 | 1.9575 | 1.4668 | 1.0842 | 0.8567 | 1.8627 | 1.7356 | 1.5106 | 1.4233 | 0.7432 | 1.1850 | 1.6530 | 1.5510 | 1.7334 | 1.5513 | 1.0824 | 0.6745 | 1.4625 | 1.6141 | 1.7602 | 1.3900 | 1.1464 | 0.9437 | 1.6218 |
| CUST_442_Pi4<br>16573500  | OR4B1  | 1.6236 | 1.9894 | 1.5705 | 1.1705 | 2.1233 | 1.7734 | 1.6222 | 1.6243 | 1.8283 | 0.7432 | 1.4400 | 1.7236 | 1.5441 | 1.8805 | 1.7655 | 1.1912 | 0.8502 | 1.4635 | 1.5544 | 1.8185 | 2.6785 | 1.1477 | 1.8132 | 1.4392 |
| CUST_451_Pi4<br>16379584  | OR4B1  | 2.2546 | 3.0580 | 2.3938 | 1.9160 | 0.9370 | 3.5060 | 2.3683 | 3.8401 | 1.4179 | 1.3034 | 1.3333 | 4.2514 | 1.7701 | 2.7792 | 1.4180 | 1.2613 | 0.8567 | 2.0199 | 2.1998 | 3.1194 | 2.9438 | 1.0206 | 1.3492 | 2.9609 |
| CUST_158_Pi4<br>16573500  | OR4C11 | 2.1523 | 2.3722 | 2.1352 | 1.4054 | 2.6346 | 6.0379 | 2.2108 | 1.5988 | 1.9458 | 1.4866 | 1.8314 | 2.0400 | 1.9009 | 2.0829 | 1.8675 | 1.2834 | 0.8526 | 1.8728 | 1.9522 | 2.0253 | 2.2218 | 1.5229 | 3.7465 | 3.1678 |
| CUST_163_Pi4<br>16379584  | OR4C11 | 2.1359 | 3.3553 | 1.8028 | 2.0383 | 0.9597 | 2.6119 | 2.2304 | 1.7558 | 1.7229 | 0.7432 | 1.5935 | 1.8786 | 1.7408 | 2.9784 | 1.5346 | 2.8162 | 0.9788 | 2.4279 | 1.9428 | 3.5118 | 1.4452 | 2.0121 | 1.8673 | 2.8075 |
| CUST_264_Pi4<br>16573500  | OR4C12 | 1.7004 | 2.0964 | 1.6822 | 2.0559 | 1.9120 | 1.9152 | 1.8645 | 1.9477 | 1.5440 | 0.7432 | 3.6094 | 1.8747 | 1.6623 | 2.6350 | 1.6390 | 1.2834 | 0.8502 | 1.9814 | 1.6606 | 1.9212 | 1.5138 | 1.2695 | 1.6214 | 1.4687 |
| CUST_272_Pi4<br>16379584  | OR4C12 | 5.9078 | 2.7630 | 3.7368 | 5.9370 | 1.9449 | 4.5415 | 3.6813 | 2.1789 | 4.7796 | 4.4727 | 1.4362 | 4.9141 | 2.5217 | 3.3417 | 4.1964 | 6.4402 | 0.6745 | 4.6205 | 4.5299 | 1.9373 | 5.3426 | 1.1121 | 2.1747 | 5.2164 |
| CUST_276_Pi4<br>16573500  | OR4C13 | 1.7615 | 2.1789 | 1.6264 | 1.2998 | 0.9501 | 2.0441 | 1.8199 | 1.8081 | 1.6167 | 0.7432 | 1.5497 | 1.7710 | 1.6347 | 1.9748 | 1.6497 | 1.2363 | 0.8522 | 1.5693 | 1.7562 | 1.9752 | 1.4562 | 1.3452 | 1.8993 | 1.5070 |
| CUST_284_Pi4<br>16379584  | OR4C13 | 1.9395 | 2.1705 | 1.4696 | 3.7815 | 0.9293 | 5.2096 | 2.1905 | 1.6946 | 1.7824 | 0.7432 | 1.3750 | 1.6732 | 1.6977 | 2.0561 | 1.4059 | 1.1738 | 0.7636 | 1.5312 | 1.7654 | 3.3204 | 2.3605 | 1.0468 | 1.1246 | 2.5681 |
| A_23_P52914               | OR4C15 | 3.5658 | 2.0125 | 4.1358 | 2.9479 | 4.5108 | 2.7006 | 4.8439 | 4.1824 | 4.5104 | 4.3123 | 3.9081 | 1.5981 | 2.2779 | 2.1291 | 4.3478 | 4.1742 | 3.4756 | 1.6978 | 3.0600 | 1.7672 | 3.8338 | 1.6738 | 3.5318 | 3.0590 |
| CUST_1556_Pi<br>416261804 | OR4C15 | 1.7450 | 2.0474 | 1.6355 | 1.3483 | 1.1417 | 2.0293 | 1.7817 | 1.6247 | 1.5215 | 0.9009 | 1.4617 | 1.8552 | 1.6621 | 1.9776 | 1.6512 | 1.3732 | 0.8459 | 1.5958 | 1.7000 | 1.8762 | 1.5089 | 1.3620 | 1.0243 | 1.4665 |
| CUST_351_Pi4<br>16573500  | OR4C16 | 1.8965 | 2.3470 | 1.6860 | 1.2954 | 1.0478 | 2.0444 | 1.9382 | 1.6746 | 1.5895 | 1.2564 | 1.6865 | 1.9367 | 1.7742 | 2.0143 | 1.7749 | 1.3167 | 0.9599 | 1.7033 | 1.7382 | 3.4738 | 1.6351 | 1.3193 | 1.9243 | 3.4985 |
| CUST_360_Pi4<br>16379584  | OR4C16 | 1.8575 | 3.5520 | 2.3848 | 1.2940 | 0.9349 | 1.9910 | 2.2298 | 1.9259 | 1.6021 | 0.7432 | 1.8040 | 1.7693 | 2.5799 | 2.0263 | 1.6664 | 1.2902 | 0.9864 | 1.9282 | 1.6991 | 2.6507 | 3.1140 | 1.2970 | 1.6304 | 3.0191 |
| A_23_P2077                | OR4C3  | 1.8628 | 2.2347 | 2.0391 | 1.2268 | 2.0802 | 1.9115 | 1.9189 | 1.8895 | 1.6141 | 1.7526 | 1.8613 | 1.9762 | 1.7759 | 2.0569 | 1.7952 | 1.3273 | 1.1794 | 1.7734 | 1.7697 | 2.0500 | 1.5134 | 1.2327 | 1.1890 | 1.6768 |
| CUST_2024_Pi<br>416261804 | OR4C3  | 1.6019 | 1.8874 | 1.5947 | 1.0336 | 0.8310 | 1.6680 | 1.6617 | 1.4768 | 1.9569 | 0.7432 | 1.2379 | 1.6389 | 1.5544 | 1.7433 | 1.6745 | 1.1065 | 0.7665 | 1.4619 | 1.6686 | 1.7120 | 1.4374 | 1.0438 | 0.8567 | 1.4243 |
| CUST_30_Pi41<br>6573500   | OR4C45 | 1.8219 | 1.9101 | 2.0349 | 1.0821 | 1.9532 | 1.7624 | 1.8177 | 1.4810 | 1.9481 | 0.7432 | 1.2191 | 1.6623 | 1.6361 | 1.7834 | 1.6480 | 2.2847 | 0.7300 | 1.5434 | 1.6204 | 1.7045 | 1.9846 | 1.1380 | 0.9276 | 1.4721 |
| CUST_32_Pi41<br>6379584   | OR4C45 | 1.7985 | 2.2083 | 1.5945 | 1.2249 | 1.1394 | 3.3480 | 1.8863 | 1.7759 | 1.5184 | 2.3466 | 1.5507 | 1.8772 | 1.9043 | 1.9777 | 1.6659 | 1.2474 | 0.8831 | 1.8947 | 1.6873 | 2.0672 | 1.4164 | 1.3020 | 1.2417 | 1.5675 |
| A_24_P281403              | OR4C46 | 2.0114 | 2.1561 | 1.5835 | 2.9768 | 1.0456 | 2.5497 | 2.1206 | 2.9784 | 1.8266 | 2.8668 | 1.6131 | 1.8125 | 1.8862 | 1.9078 | 1.6798 | 1.2421 | 1.0344 | 1.6574 | 1.9569 | 2.0070 | 1.4785 | 1.7386 | 1.2585 | 1.9806 |
| CUST_179_Pi4<br>16261804  | OR4C46 | 1.8745 | 1.9288 | 1.4677 | 1.0657 | 0.9236 | 2.6821 | 2.1352 | 1.5274 | 2.0526 | 0.7432 | 2.8315 | 1.6432 | 1.6873 | 1.7370 | 1.4887 | 1.2210 | 0.7496 | 1.4895 | 1.7452 | 1.7583 | 2.1474 | 1.0647 | 0.9396 | 2.0260 |
| CUST_322_Pi4<br>16573500  | OR4C6  | 1.7063 | 1.9403 | 1.4438 | 1.0759 | 0.7772 | 1.8206 | 1.8660 | 1.5460 | 1.6932 | 0.7432 | 1.1838 | 1.6377 | 1.6209 | 1.7514 | 1.6175 | 1.4055 | 0.6745 | 1.5074 | 1.6327 | 1.7169 | 1.5540 | 1.1196 | 0.9617 | 1.5233 |
| CUST_331_Pi4<br>16379584  | OR4C6  | 2.1838 | 3.4613 | 1.5591 | 1.2195 | 1.1532 | 1.7452 | 2.4420 | 1.8081 | 1.8062 | 1.7824 | 2.4745 | 1.8049 | 2.2195 | 1.9135 | 1.6450 | 1.3222 | 1.2473 | 2.0879 | 1.9524 | 3.1920 | 2.8360 | 0.9833 | 2.0603 | 3.4441 |
| CUST_510_Pi4<br>16573500  | OR4D1  | 1.7839 | 2.4092 | 1.7337 | 1.2673 | 1.2161 | 2.1386 | 1.8110 | 1.7873 | 1.6536 | 0.7432 | 1.6953 | 2.1265 | 1.7664 | 2.0996 | 1.9153 | 1.3061 | 1.1820 | 1.8887 | 1.7562 | 2.3412 | 1.7509 | 1.2730 | 1.3699 | 1.6509 |

|                           |        |        |        |        |        |        |        |        |        |        |        |        |        |        |        |        |        |        |        |        |        |        |        |        |        |
|---------------------------|--------|--------|--------|--------|--------|--------|--------|--------|--------|--------|--------|--------|--------|--------|--------|--------|--------|--------|--------|--------|--------|--------|--------|--------|--------|
| CUST_521_Pi4<br>16379584  | OR4D1  | 2.2866 | 2.3470 | 2.6638 | 1.2384 | 0.9139 | 1.9142 | 2.5699 | 3.7117 | 2.0407 | 0.7432 | 1.9515 | 2.1807 | 1.8775 | 2.0051 | 1.7147 | 1.4059 | 1.1270 | 1.8796 | 2.3193 | 3.8324 | 3.1928 | 1.3879 | 1.3205 | 2.7126 |
| CUST_135_Pi4<br>16573500  | OR4D10 | 2.1342 | 1.9735 | 2.2835 | 0.8993 | 0.9901 | 1.5248 | 2.5119 | 1.6548 | 3.7465 | 1.3509 | 2.0618 | 1.6469 | 1.7900 | 1.7093 | 3.3555 | 1.2526 | 1.8502 | 1.4989 | 1.9377 | 1.9150 | 3.2941 | 0.7688 | 1.0852 | 1.9846 |
| CUST_140_Pi4<br>16379584  | OR4D10 | 4.0579 | 3.7088 | 5.2840 | 4.8971 | 5.2858 | 3.9585 | 3.9236 | 4.6654 | 5.4893 | 5.8030 | 4.6753 | 3.3063 | 3.9933 | 2.9150 | 5.2041 | 3.9672 | 4.1655 | 3.5463 | 4.0132 | 3.0661 | 5.6776 | 5.3930 | 5.3145 | 3.8926 |
| CUST_324_Pi4<br>16573500  | OR4D11 | 1.7079 | 1.8540 | 3.1188 | 1.9549 | 3.3216 | 1.5700 | 1.9645 | 3.6674 | 3.5643 | 2.2586 | 1.7341 | 1.5481 | 1.6442 | 1.6337 | 1.6272 | 1.0312 | 0.7338 | 1.4479 | 1.8652 | 2.2874 | 2.3170 | 3.2282 | 2.6233 | 1.5157 |
| CUST_333_Pi4<br>16379584  | OR4D11 | 2.2702 | 2.0660 | 2.6033 | 1.1583 | 3.0317 | 2.1136 | 2.3821 | 1.6333 | 2.7397 | 2.4785 | 2.3325 | 1.7586 | 1.9500 | 1.8564 | 1.7451 | 1.2130 | 1.6898 | 1.6616 | 1.9594 | 1.9390 | 2.1002 | 1.1909 | 2.4497 | 1.7872 |
| A_23_P77797               | OR4D2  | 7.2695 | 7.1110 | 8.1811 | 7.2250 | 8.0300 | 7.0444 | 7.0913 | 7.4021 | 8.1366 | 7.5584 | 6.7809 | 7.2632 | 5.8575 | 7.3279 | 8.3460 | 6.2166 | 6.8718 | 6.8438 | 6.7622 | 6.7339 | 7.8250 | 7.5782 | 7.4371 | 6.5940 |
| CUST_2198_Pi<br>416261804 | OR4D2  | 2.9585 | 1.8784 | 3.6832 | 3.3253 | 3.6218 | 1.9395 | 3.3730 | 3.3004 | 3.4958 | 3.6053 | 3.0757 | 1.5581 | 2.0982 | 3.0825 | 2.8594 | 3.1291 | 2.9941 | 2.0303 | 2.8070 | 1.5917 | 3.1196 | 4.4055 | 4.3178 | 4.0194 |
| A_23_P75663               | OR4D5  | 1.7589 | 2.0078 | 1.9041 | 1.1047 | 1.8050 | 1.7823 | 1.9392 | 1.5905 | 2.3389 | 0.7432 | 1.4183 | 1.7940 | 1.7008 | 1.8717 | 1.6611 | 1.2467 | 0.9025 | 1.5555 | 1.6731 | 1.8856 | 1.9072 | 1.1140 | 1.0666 | 1.5637 |
| CUST_1038_Pi<br>416261804 | OR4D5  | 2.0278 | 2.3831 | 2.4188 | 2.9960 | 2.9839 | 2.1787 | 2.1490 | 1.8422 | 2.4480 | 2.7203 | 2.2431 | 2.0993 | 1.8899 | 2.1598 | 1.9193 | 1.3239 | 1.4613 | 1.9919 | 1.9479 | 2.3152 | 1.9939 | 1.3543 | 2.6112 | 1.8797 |
| CUST_233_Pi4<br>16573500  | OR4D6  | 4.0590 | 2.2302 | 4.4892 | 2.1986 | 3.4166 | 4.0379 | 4.7179 | 3.4649 | 5.0085 | 3.7894 | 3.9859 | 1.7483 | 2.4828 | 2.2545 | 4.6757 | 3.1226 | 3.5582 | 2.5352 | 2.9289 | 3.9325 | 3.5999 | 2.6781 | 4.3510 | 3.9913 |
| CUST_240_Pi4<br>16379584  | OR4D6  | 3.5422 | 4.8226 | 4.4860 | 4.3312 | 4.5933 | 2.5544 | 4.9060 | 4.3675 | 4.4808 | 4.5745 | 3.9275 | 3.5622 | 3.7212 | 3.3884 | 4.7084 | 3.6318 | 4.3444 | 2.4034 | 3.6818 | 3.2552 | 4.1373 | 4.6393 | 4.2271 | 3.6805 |
| CUST_440_Pi4<br>16573500  | OR4D9  | 1.8800 | 2.2516 | 2.2769 | 1.1893 | 4.1866 | 1.9161 | 2.0219 | 3.4086 | 2.1481 | 0.7432 | 1.6258 | 1.9481 | 1.8017 | 2.0215 | 1.7426 | 1.3173 | 1.0929 | 1.7594 | 1.7383 | 2.0736 | 1.7518 | 1.2059 | 2.2677 | 1.7309 |
| CUST_449_Pi4<br>16379584  | OR4D9  | 2.4156 | 3.5194 | 2.3487 | 2.4381 | 0.8519 | 3.4473 | 2.8763 | 1.7571 | 1.9701 | 1.1753 | 1.4647 | 3.3742 | 1.8076 | 2.5034 | 2.1801 | 3.5773 | 1.9297 | 2.6113 | 2.1482 | 3.1540 | 3.9923 | 1.9615 | 0.9791 | 4.8816 |
| CUST_505_Pi4<br>16573500  | OR4E2  | 1.9886 | 6.8701 | 1.7901 | 1.5252 | 1.3947 | 4.1841 | 2.1481 | 1.7602 | 2.2433 | 0.7432 | 1.6532 | 1.9611 | 1.8521 | 2.1339 | 2.3070 | 1.6735 | 1.0969 | 1.8746 | 1.8925 | 1.9907 | 1.6375 | 1.5498 | 1.6624 | 1.6056 |
| CUST_516_Pi4<br>16379584  | OR4E2  | 2.1368 | 2.3121 | 1.7736 | 1.1889 | 0.8616 | 1.8886 | 2.3569 | 1.6641 | 1.6911 | 2.6212 | 1.6655 | 3.2455 | 1.8627 | 1.9495 | 1.6877 | 1.3013 | 1.0708 | 2.7515 | 1.9715 | 2.4936 | 2.2880 | 2.8731 | 1.2965 | 1.9707 |
| CUST_291_Pi4<br>16573500  | OR4F15 | 1.6681 | 1.9722 | 1.9993 | 1.1585 | 0.9913 | 1.8504 | 1.7132 | 1.5512 | 1.6190 | 2.6853 | 1.3363 | 1.7657 | 1.5862 | 1.8445 | 1.6212 | 1.2355 | 1.8741 | 1.4979 | 1.6223 | 1.8179 | 1.4341 | 1.1884 | 0.9420 | 1.4316 |
| CUST_299_Pi4<br>16379584  | OR4F15 | 2.0645 | 2.1877 | 1.6901 | 1.2847 | 1.0911 | 1.9769 | 2.2988 | 1.9233 | 1.6157 | 1.0273 | 1.7115 | 2.4597 | 1.8426 | 2.0863 | 1.6246 | 1.5352 | 1.4154 | 1.6766 | 1.9302 | 2.6466 | 1.5210 | 1.3366 | 1.2586 | 1.8216 |
| CUST_29_Pi41<br>6379584   | OR4F21 | 4.4749 | 4.3703 | 2.8175 | 2.9901 | 1.0291 | 4.0350 | 4.1293 | 4.1274 | 2.9807 | 3.1584 | 2.4778 | 3.5500 | 2.2373 | 1.8875 | 2.0334 | 2.2941 | 0.8093 | 2.9243 | 3.3978 | 4.5005 | 3.1065 | 1.2217 | 2.2029 | 4.9931 |
| CUST_27_Pi41<br>6573500   | OR4F3  | 5.2735 | 5.3321 | 5.5655 | 5.2250 | 6.0498 | 3.8924 | 6.0233 | 5.6226 | 5.6347 | 5.3679 | 5.0771 | 3.7429 | 4.3416 | 5.8100 | 6.0356 | 4.0090 | 5.1670 | 4.9052 | 5.0485 | 5.3709 | 5.2201 | 5.7010 | 5.5279 | 4.0298 |
| CUST_520_Pi4<br>16379584  | OR4F3  | 3.1852 | 3.4376 | 2.8802 | 2.4955 | 0.7542 | 3.5668 | 3.3328 | 3.2105 | 2.7255 | 0.7432 | 1.0638 | 2.3550 | 2.9905 | 3.0869 | 1.6892 | 1.7445 | 2.4453 | 3.3044 | 2.3337 | 3.4907 | 3.5366 | 2.7203 | 1.8150 | 3.0681 |
| A_24_P58501               | OR4F4  | 1.6706 | 2.3514 | 1.6230 | 2.7776 | 1.9975 | 1.9347 | 1.6877 | 3.1833 | 2.0147 | 2.8359 | 1.6268 | 1.8844 | 1.5868 | 2.7667 | 1.7754 | 1.2993 | 0.9504 | 1.5775 | 1.6171 | 2.1013 | 1.4886 | 3.0285 | 1.1405 | 1.4569 |
| CUST_1808_Pi<br>416261804 | OR4F4  | 1.7096 | 3.1533 | 2.4440 | 0.9646 | 0.9131 | 1.6183 | 1.9872 | 2.1508 | 1.4167 | 0.7432 | 1.4109 | 1.5916 | 1.6282 | 1.7524 | 1.5248 | 1.2519 | 0.9280 | 1.7831 | 1.5709 | 1.8093 | 2.2363 | 0.9634 | 0.9133 | 1.5248 |
| CUST_964_Pi4<br>16261804  | OR4F5  | 3.6114 | 2.0964 | 2.5003 | 1.1365 | 1.1976 | 1.8245 | 3.1378 | 2.2267 | 2.3755 | 0.7432 | 1.6007 | 1.6607 | 2.0177 | 1.8814 | 1.4626 | 1.6133 | 1.1475 | 1.7427 | 2.3498 | 2.6691 | 3.3548 | 1.5910 | 1.1198 | 2.9329 |

|                           |        |        |        |        |        |        |        |        |        |        |        |        |        |        |        |        |        |        |        |        |        |        |        |        |        |
|---------------------------|--------|--------|--------|--------|--------|--------|--------|--------|--------|--------|--------|--------|--------|--------|--------|--------|--------|--------|--------|--------|--------|--------|--------|--------|--------|
| CUST_1150_PI<br>416573500 | OR4F6  | 1.6559 | 2.0829 | 1.4940 | 1.2547 | 0.8184 | 1.8831 | 1.7170 | 1.7555 | 1.4643 | 0.7432 | 1.4250 | 1.7752 | 1.5841 | 1.8540 | 1.6326 | 1.1229 | 0.7975 | 1.5303 | 1.5973 | 1.8519 | 1.3911 | 1.1399 | 1.0261 | 1.4728 |
| CUST_1188_PI<br>416379584 | OR4F6  | 1.9299 | 1.8613 | 1.4208 | 0.9331 | 0.7206 | 1.6581 | 2.2440 | 1.5693 | 1.7008 | 0.7432 | 1.2125 | 1.4708 | 1.6862 | 4.9632 | 1.4061 | 1.2911 | 0.6851 | 1.4270 | 1.7290 | 1.6328 | 2.3152 | 0.9334 | 1.0739 | 2.7892 |
| A_23_P2973                | OR4K1  | 1.6063 | 1.8937 | 1.4499 | 1.0636 | 2.1505 | 1.7128 | 1.6692 | 1.5501 | 1.5833 | 0.7432 | 1.2906 | 1.6618 | 1.5608 | 1.7790 | 1.6389 | 1.0691 | 0.7770 | 1.4700 | 1.5480 | 1.6887 | 1.3955 | 1.0636 | 0.9265 | 1.4412 |
| CUST_1901_PI<br>416261804 | OR4K1  | 3.7555 | 2.2710 | 3.7414 | 5.0915 | 3.1501 | 3.3786 | 3.8575 | 1.8992 | 4.2505 | 4.2002 | 3.0082 | 2.1444 | 5.6480 | 1.6355 | 3.6441 | 6.5313 | 3.1362 | 4.1901 | 4.6433 | 1.5394 | 4.8790 | 2.4955 | 3.3573 | 3.6466 |
| CUST_172_PI4<br>16573500  | OR4K13 | 1.7685 | 2.4131 | 1.8511 | 1.4868 | 2.0663 | 2.3336 | 1.6307 | 1.7955 | 1.8186 | 0.9748 | 2.4733 | 2.2269 | 1.6863 | 3.6467 | 1.9644 | 1.8188 | 1.2056 | 3.0992 | 1.7290 | 3.7880 | 1.6590 | 2.5666 | 1.7098 | 1.5583 |
| CUST_177_PI4<br>16379584  | OR4K13 | 1.8603 | 2.4533 | 2.4213 | 1.3905 | 1.1418 | 2.1992 | 1.8953 | 1.9315 | 1.6322 | 0.8404 | 1.7714 | 2.0245 | 1.7167 | 2.0930 | 1.7515 | 1.3206 | 1.0311 | 1.7523 | 1.7290 | 2.2241 | 1.5767 | 1.4949 | 1.3122 | 1.6374 |
| CUST_168_PI4<br>16573500  | OR4K14 | 1.8368 | 2.3370 | 1.8785 | 1.3096 | 1.1819 | 1.9948 | 1.9132 | 1.7810 | 1.8453 | 0.7432 | 1.8169 | 2.0590 | 1.7607 | 2.0337 | 2.2387 | 1.3717 | 1.3007 | 1.7924 | 1.7515 | 2.1998 | 1.6195 | 1.3232 | 1.3449 | 1.6648 |
| CUST_173_PI4<br>16379584  | OR4K14 | 2.5010 | 3.0323 | 2.8790 | 1.9908 | 3.5144 | 3.7665 | 2.9543 | 2.9246 | 2.6132 | 2.7099 | 2.9792 | 2.3819 | 1.6902 | 3.0909 | 1.7304 | 1.6253 | 1.1606 | 2.3444 | 1.9227 | 2.1117 | 3.1092 | 2.7271 | 2.8101 | 2.1529 |
| CUST_342_PI4<br>16573500  | OR4K15 | 1.9052 | 2.1676 | 1.8017 | 1.5232 | 1.3197 | 2.1996 | 1.9812 | 1.7603 | 1.6793 | 0.7432 | 1.6372 | 1.9428 | 1.8023 | 2.1457 | 1.6950 | 1.6078 | 1.0183 | 1.7448 | 1.8295 | 1.9315 | 1.6299 | 1.5941 | 1.1923 | 1.7110 |
| CUST_351_PI4<br>16379584  | OR4K15 | 1.7203 | 2.2648 | 1.5061 | 1.1209 | 0.8486 | 3.2815 | 1.8585 | 1.8811 | 1.4563 | 0.7432 | 1.5193 | 1.8459 | 1.6576 | 2.8321 | 1.6263 | 1.1718 | 0.8847 | 1.6119 | 1.8819 | 2.0211 | 1.4470 | 1.1188 | 1.0927 | 1.5881 |
| A_23_P54088               | OR4K17 | 3.0211 | 2.3605 | 1.6673 | 1.3565 | 1.6039 | 2.1937 | 2.0988 | 1.8473 | 1.7345 | 0.7688 | 1.7098 | 1.9631 | 1.9137 | 2.8164 | 1.7240 | 1.2909 | 1.0108 | 1.7687 | 1.8280 | 2.1618 | 2.5040 | 1.4763 | 1.3553 | 2.8848 |
| CUST_1168_PI<br>416261804 | OR4K17 | 2.0443 | 1.8791 | 4.0857 | 1.0378 | 2.4100 | 1.6531 | 2.3908 | 1.5236 | 3.7992 | 2.8203 | 2.3904 | 1.6076 | 1.7684 | 1.7012 | 3.2039 | 1.2649 | 1.1774 | 1.5005 | 1.9755 | 1.7438 | 2.9855 | 0.9995 | 3.2983 | 1.7199 |
| CUST_352_PI4<br>16573500  | OR4K2  | 4.2972 | 3.8573 | 4.5657 | 4.0597 | 5.1802 | 2.8006 | 3.8983 | 3.1230 | 4.5693 | 4.6444 | 3.5360 | 4.6100 | 2.6619 | 3.8670 | 4.8106 | 2.2591 | 3.7257 | 2.6290 | 4.3294 | 3.0940 | 4.2093 | 4.4143 | 4.6273 | 3.7596 |
| CUST_361_PI4<br>16379584  | OR4K2  | 1.7918 | 2.0341 | 1.4530 | 1.9328 | 0.8764 | 1.8922 | 1.9509 | 1.8522 | 1.4282 | 1.7401 | 1.2630 | 1.6529 | 1.6593 | 2.0553 | 1.5161 | 1.0483 | 0.7112 | 1.9006 | 3.7537 | 2.6848 | 1.8590 | 1.1832 | 1.0548 | 1.8035 |
| CUST_338_PI4<br>16573500  | OR4K5  | 1.9757 | 1.8676 | 3.1634 | 1.0849 | 3.1122 | 1.7276 | 2.2509 | 3.3496 | 2.4907 | 3.0523 | 1.1844 | 1.6350 | 1.7515 | 1.7677 | 1.7190 | 1.0176 | 0.6745 | 1.5461 | 1.8727 | 1.6596 | 3.5595 | 2.3636 | 2.5807 | 2.8834 |
| CUST_347_PI4<br>16379584  | OR4K5  | 1.9878 | 2.2898 | 1.6458 | 1.2431 | 1.2830 | 2.8655 | 2.1579 | 2.0301 | 1.6121 | 1.2595 | 1.7092 | 2.0032 | 1.8804 | 2.0543 | 1.7075 | 1.3843 | 1.0956 | 1.7434 | 1.8062 | 2.1283 | 1.5055 | 1.2469 | 1.2830 | 1.8234 |
| CUST_175_PI4<br>16573500  | OR4L1  | 1.9032 | 1.8418 | 1.4529 | 0.9120 | 0.8076 | 1.5778 | 2.2226 | 1.5404 | 1.5047 | 0.7432 | 1.2633 | 1.5438 | 1.7396 | 1.6639 | 1.4773 | 1.0867 | 0.8245 | 1.5249 | 1.7311 | 1.6534 | 2.6202 | 0.9408 | 3.8833 | 1.7189 |
| CUST_180_PI4<br>16379584  | OR4L1  | 2.1885 | 2.2426 | 1.7985 | 1.3425 | 1.2183 | 2.5468 | 2.4876 | 3.2233 | 1.8381 | 0.7432 | 1.6384 | 1.8552 | 1.8508 | 2.8383 | 1.5943 | 1.6150 | 1.0244 | 1.8197 | 1.9991 | 2.0587 | 1.8221 | 1.3598 | 1.9433 | 1.8045 |
| CUST_252_PI4<br>16573500  | OR4M1  | 2.1478 | 2.2081 | 3.0312 | 1.5278 | 3.5265 | 2.1438 | 2.3677 | 2.5541 | 3.1926 | 1.0360 | 2.9752 | 1.9683 | 1.9432 | 2.1736 | 2.5273 | 1.7235 | 2.9120 | 1.7518 | 2.0342 | 2.0901 | 2.0160 | 1.5399 | 3.6661 | 1.7766 |
| CUST_260_PI4<br>16379584  | OR4M1  | 2.7004 | 2.1958 | 2.4616 | 1.1966 | 0.8516 | 1.9183 | 3.0712 | 1.6854 | 1.9179 | 2.0202 | 1.5792 | 1.7267 | 2.0353 | 1.9082 | 1.5678 | 1.2451 | 0.9801 | 2.4903 | 2.3546 | 1.9555 | 3.0927 | 1.2446 | 1.6744 | 2.4588 |
| CUST_329_PI4<br>16573500  | OR4M2  | 1.9955 | 2.2087 | 2.9707 | 1.6202 | 2.7291 | 2.2904 | 2.0874 | 1.7999 | 2.6999 | 1.7871 | 3.0829 | 2.0505 | 1.8906 | 2.2280 | 2.3368 | 1.7255 | 2.1621 | 1.8176 | 1.8924 | 2.0084 | 2.1463 | 1.7040 | 2.3155 | 1.6375 |
| CUST_338_PI4<br>16379584  | OR4M2  | 2.2090 | 2.5702 | 1.6833 | 1.0808 | 0.8975 | 2.7445 | 2.5481 | 1.7602 | 1.5932 | 0.7432 | 1.5841 | 2.5889 | 1.7422 | 1.7961 | 1.4986 | 1.2681 | 0.9661 | 2.0013 | 2.1233 | 1.8732 | 2.8254 | 1.0223 | 1.1258 | 2.9566 |
| CUST_656_PI4<br>17507815  | OR4M2  | 1.7461 | 1.7802 | 2.9350 | 1.0051 | 1.8385 | 1.7733 | 1.9187 | 1.3951 | 3.2425 | 0.7432 | 1.5701 | 1.5858 | 1.6591 | 1.6377 | 3.4059 | 1.4135 | 1.4109 | 1.6088 | 1.6673 | 1.6257 | 2.1222 | 1.0948 | 2.0793 | 1.5410 |
| CUST_394_PI4<br>16573500  | OR4N2  | 1.7400 | 1.7204 | 1.3926 | 2.5617 | 2.0229 | 2.3173 | 1.9760 | 1.9414 | 1.8963 | 1.5601 | 2.3542 | 1.4899 | 1.6752 | 1.5873 | 1.5630 | 0.9308 | 0.7188 | 1.4647 | 1.8230 | 1.5328 | 1.9908 | 0.9607 | 1.8315 | 1.5231 |

|                           |        |        |        |        |        |        |        |        |        |        |        |        |        |        |        |        |        |        |        |        |        |        |        |        |        |
|---------------------------|--------|--------|--------|--------|--------|--------|--------|--------|--------|--------|--------|--------|--------|--------|--------|--------|--------|--------|--------|--------|--------|--------|--------|--------|--------|
| CUST_403_Pi4<br>16379584  | OR4N2  | 2.9246 | 2.6464 | 2.0405 | 4.6765 | 3.3494 | 2.1057 | 3.2476 | 4.0027 | 2.2658 | 4.0926 | 3.3243 | 2.0459 | 1.9442 | 3.1452 | 3.0098 | 3.1629 | 2.7250 | 1.7785 | 2.8477 | 2.2848 | 1.9553 | 2.1912 | 3.3747 | 3.2346 |
| CUST_10_Pi41<br>6379584   | OR4N3P | 2.3066 | 2.3201 | 1.7361 | 3.6005 | 1.0845 | 2.1222 | 2.4938 | 1.6937 | 1.7647 | 3.9117 | 1.7617 | 1.7450 | 2.1218 | 2.3512 | 1.5478 | 2.2640 | 0.7818 | 2.3507 | 2.1587 | 3.3025 | 1.4858 | 3.4596 | 2.2896 | 3.3178 |
| CUST_8_Pi416<br>573500    | OR4N3P | 1.6456 | 1.9905 | 1.5723 | 1.9950 | 1.8205 | 1.7995 | 1.6570 | 1.5423 | 1.5195 | 1.8756 | 1.3470 | 1.8004 | 1.5764 | 1.8596 | 1.7549 | 1.2082 | 1.8705 | 1.5206 | 1.6018 | 1.8565 | 1.4634 | 1.1662 | 0.9610 | 1.4518 |
| A_23_P336176              | OR4N4  | 1.9103 | 2.3790 | 1.7627 | 1.5271 | 1.1355 | 2.2747 | 1.9488 | 2.0225 | 1.6869 | 3.2218 | 1.7362 | 1.9479 | 1.7196 | 2.1282 | 1.7676 | 1.3725 | 0.9166 | 1.6889 | 1.7257 | 2.1150 | 1.5656 | 1.5747 | 2.0129 | 1.6110 |
| A_23_P88643               | OR4N4  | 2.0621 | 2.1740 | 2.2462 | 3.7282 | 1.3169 | 2.2520 | 2.3823 | 3.1767 | 2.2143 | 3.1585 | 2.7242 | 1.7732 | 1.7921 | 1.9691 | 1.6961 | 1.5451 | 1.0711 | 1.6357 | 1.9995 | 2.4568 | 2.5487 | 1.1757 | 1.0358 | 2.3779 |
| A_24_P210611              | OR4N4  | 1.7363 | 2.0238 | 1.6012 | 1.2145 | 0.7459 | 1.8786 | 1.8121 | 1.5445 | 1.5749 | 0.7432 | 1.4225 | 1.7871 | 1.6960 | 1.8716 | 1.6321 | 1.1915 | 1.2695 | 1.5633 | 1.6566 | 1.7433 | 1.5135 | 1.2374 | 1.1009 | 1.4849 |
| CUST_331_Pi4<br>16573500  | OR4N5  | 1.5851 | 1.9032 | 1.4879 | 1.0678 | 1.4487 | 1.6849 | 1.6343 | 1.5396 | 1.5632 | 0.7432 | 1.3245 | 1.6865 | 1.5621 | 1.8093 | 1.6968 | 1.1104 | 0.8632 | 1.5575 | 1.5409 | 1.7039 | 1.4062 | 1.0521 | 0.9163 | 1.4294 |
| CUST_340_Pi4<br>16379584  | OR4N5  | 1.6679 | 2.0111 | 1.5471 | 1.1404 | 2.3079 | 1.7831 | 1.7703 | 1.6646 | 1.6979 | 0.7432 | 1.4492 | 1.7567 | 1.6399 | 1.8961 | 1.6798 | 1.2617 | 0.9484 | 1.6557 | 1.6078 | 1.8347 | 1.9386 | 1.1808 | 0.9958 | 1.4651 |
| CUST_271_Pi4<br>16573500  | OR4P4  | 3.7846 | 2.0561 | 4.4630 | 3.0299 | 1.4009 | 3.5139 | 4.2960 | 2.7080 | 4.3850 | 3.2668 | 1.6732 | 4.3222 | 2.4989 | 1.8257 | 4.1048 | 2.3459 | 2.6712 | 4.0894 | 3.8903 | 3.0506 | 3.8010 | 1.4765 | 3.4764 | 4.5573 |
| CUST_279_Pi4<br>16379584  | OR4P4  | 2.0989 | 2.9729 | 1.6659 | 1.1856 | 0.9586 | 1.9799 | 2.3176 | 2.0829 | 1.5405 | 0.7432 | 1.7180 | 2.0170 | 1.8551 | 2.0689 | 1.6656 | 1.4638 | 1.0768 | 1.7139 | 2.4002 | 2.1836 | 2.2985 | 1.1535 | 1.2412 | 1.9248 |
| CUST_364_Pi4<br>16573500  | OR4Q3  | 1.6138 | 1.9301 | 1.5016 | 1.0920 | 0.7870 | 1.7197 | 1.6692 | 1.5608 | 1.5206 | 0.7432 | 1.3466 | 1.7184 | 1.5957 | 1.8409 | 1.7025 | 1.1255 | 1.5863 | 1.5179 | 1.5558 | 1.7251 | 1.5955 | 1.0877 | 0.9522 | 1.7948 |
| CUST_373_Pi4<br>16379584  | OR4Q3  | 1.9870 | 3.4776 | 1.7634 | 1.1696 | 0.7382 | 2.3206 | 2.2554 | 2.6602 | 1.4819 | 0.7432 | 1.4654 | 1.6702 | 1.7733 | 1.7915 | 1.4809 | 1.2033 | 0.8516 | 1.4962 | 1.8381 | 1.7497 | 1.9730 | 1.0902 | 1.1170 | 1.9555 |
| A_23_P13479               | OR4S1  | 1.7595 | 1.9390 | 1.9714 | 1.1959 | 3.1587 | 1.9255 | 2.2019 | 1.4863 | 1.8039 | 0.7432 | 2.5306 | 1.7838 | 2.1893 | 1.8675 | 1.6188 | 1.1661 | 2.4540 | 1.6168 | 1.7064 | 1.7760 | 1.5074 | 1.2764 | 2.2773 | 1.5880 |
| CUST_2292_Pi<br>416261804 | OR4S1  | 2.4034 | 3.3422 | 2.5814 | 2.0722 | 0.9963 | 1.6522 | 2.6838 | 1.5542 | 2.1824 | 0.7432 | 2.3504 | 1.6828 | 1.9267 | 1.7315 | 1.5374 | 2.3768 | 0.9748 | 1.6284 | 2.4258 | 2.1107 | 3.4576 | 0.9687 | 1.1787 | 3.6487 |
| CUST_253_Pi4<br>16573500  | OR4S2  | 2.6791 | 2.0445 | 3.5406 | 0.8971 | 2.2147 | 2.0194 | 2.9669 | 1.9891 | 3.0718 | 2.4435 | 2.0123 | 1.4763 | 1.7131 | 1.5484 | 1.4971 | 1.1305 | 0.6745 | 2.1448 | 2.0730 | 1.6761 | 4.1953 | 2.0610 | 2.0706 | 2.3958 |
| CUST_261_Pi4<br>16379584  | OR4S2  | 1.9867 | 1.8796 | 1.6121 | 0.8600 | 2.3859 | 2.1741 | 2.3439 | 1.5767 | 1.5578 | 0.7432 | 1.3649 | 1.5110 | 1.9851 | 1.6728 | 1.3900 | 1.1420 | 0.8986 | 1.5169 | 1.8114 | 1.7790 | 2.7888 | 0.7432 | 1.5496 | 1.8225 |
| CUST_481_Pi4<br>16573500  | OR4X1  | 2.9357 | 2.0136 | 3.7311 | 2.4434 | 4.3594 | 1.7183 | 3.1149 | 3.5091 | 3.8562 | 2.9646 | 3.2281 | 1.5579 | 2.8706 | 3.2859 | 3.2702 | 2.7319 | 3.1772 | 1.7635 | 3.4358 | 2.3651 | 3.9575 | 1.1191 | 3.8617 | 1.8837 |
| CUST_491_Pi4<br>16379584  | OR4X1  | 3.6806 | 3.7662 | 4.0741 | 2.0670 | 1.8901 | 1.7373 | 2.7514 | 3.0875 | 3.7909 | 1.7275 | 2.3738 | 3.2250 | 1.7787 | 3.7860 | 3.6554 | 1.0810 | 0.7105 | 2.4569 | 2.3970 | 2.6062 | 3.3392 | 2.3604 | 1.7102 | 3.6938 |
| A_24_P349274              | OR4X2  | 2.7108 | 1.9209 | 4.1507 | 1.5106 | 5.2839 | 1.7861 | 3.0831 | 3.5173 | 3.1250 | 2.4096 | 3.2641 | 1.6765 | 2.2514 | 2.6313 | 4.0990 | 1.2955 | 2.8407 | 1.8588 | 3.6843 | 1.6189 | 3.2657 | 1.1255 | 4.1316 | 2.2687 |
| CUST_1743_Pi<br>416261804 | OR4X2  | 1.8522 | 2.7048 | 2.2626 | 0.8272 | 0.7176 | 1.8142 | 2.2292 | 1.4433 | 1.3607 | 0.9334 | 1.1424 | 1.4157 | 1.6459 | 1.4748 | 1.3819 | 0.9746 | 0.7300 | 2.1718 | 1.9948 | 2.8049 | 2.4478 | 0.9818 | 0.8297 | 3.6503 |
| CUST_273_Pi4<br>16573500  | OR51A2 | 1.8833 | 2.2829 | 1.7175 | 1.2402 | 1.2795 | 2.0315 | 1.9995 | 1.8045 | 1.6864 | 0.7688 | 1.6919 | 2.0074 | 1.8006 | 2.0773 | 1.8211 | 1.3193 | 1.2041 | 1.8466 | 1.8089 | 2.2180 | 1.9560 | 1.2680 | 2.4554 | 1.7482 |
| CUST_454_Pi4<br>16379584  | OR51A2 | 1.7240 | 2.1701 | 1.5660 | 1.2016 | 1.0377 | 1.9576 | 1.7626 | 1.7728 | 4.1244 | 0.7432 | 1.5562 | 1.7956 | 1.6058 | 1.9139 | 1.6601 | 1.2168 | 0.8769 | 1.7689 | 1.6510 | 2.0058 | 1.4167 | 1.2659 | 1.1635 | 1.5062 |
| CUST_281_Pi4<br>16379584  | OR51A4 | 1.9207 | 2.9541 | 1.6066 | 1.2398 | 1.1497 | 2.0903 | 2.0408 | 2.0121 | 1.5236 | 0.8293 | 1.6470 | 1.9712 | 1.7708 | 2.0133 | 1.6736 | 1.2950 | 0.9949 | 4.2655 | 1.7741 | 2.1243 | 1.5001 | 1.2737 | 2.3520 | 1.7773 |
| A_23_P13455               | OR51A7 | 3.1660 | 2.2825 | 2.3604 | 3.5578 | 3.9145 | 1.6182 | 3.4189 | 3.8667 | 3.5667 | 3.3574 | 3.5442 | 1.7117 | 1.8885 | 2.8917 | 1.6188 | 4.3921 | 2.9496 | 1.4291 | 2.9237 | 2.9150 | 3.4446 | 3.5226 | 3.9657 | 2.0140 |

|                           |        |        |        |        |        |        |        |        |        |        |        |        |        |        |        |        |        |        |        |        |        |        |        |        |        |
|---------------------------|--------|--------|--------|--------|--------|--------|--------|--------|--------|--------|--------|--------|--------|--------|--------|--------|--------|--------|--------|--------|--------|--------|--------|--------|--------|
| CUST_1233_PI<br>416261804 | OR51A7 | 1.5820 | 1.9409 | 1.4584 | 1.0574 | 0.8318 | 2.0525 | 1.6452 | 1.5488 | 1.4439 | 0.7432 | 1.2656 | 1.6471 | 1.5156 | 1.7573 | 1.6551 | 1.1022 | 0.7160 | 1.4384 | 1.5436 | 1.7479 | 1.4066 | 1.1687 | 0.8723 | 1.4243 |
| A_23_P116640              | OR51B2 | 1.9906 | 2.3370 | 3.1444 | 1.1938 | 0.9218 | 2.0196 | 2.1153 | 2.9214 | 2.0853 | 0.7432 | 3.8916 | 1.9890 | 1.8725 | 2.4423 | 2.1352 | 3.3669 | 1.0819 | 1.7991 | 1.8630 | 2.1547 | 1.7257 | 1.2339 | 1.2601 | 1.8784 |
| CUST_653_PI4<br>16261804  | OR51B2 | 2.1079 | 4.1196 | 1.6014 | 2.6848 | 0.8249 | 2.1215 | 2.2813 | 3.6395 | 2.0941 | 0.7432 | 3.1794 | 2.6253 | 1.8716 | 2.8041 | 1.5273 | 1.3009 | 0.8950 | 1.9214 | 2.2470 | 2.1289 | 1.9625 | 2.3538 | 1.9957 | 3.1108 |
| A_23_P128023              | OR51B4 | 2.0162 | 2.2927 | 1.9653 | 1.4035 | 1.4349 | 2.2767 | 2.0716 | 1.7393 | 1.7060 | 0.7432 | 1.9916 | 3.6721 | 1.7887 | 2.0594 | 1.6975 | 2.3507 | 0.8585 | 3.1660 | 1.8263 | 1.9909 | 2.2367 | 1.5497 | 1.5773 | 2.6756 |
| CUST_2130_PI<br>416261804 | OR51B4 | 3.5469 | 3.1437 | 3.5457 | 1.4279 | 1.2713 | 2.9792 | 3.0968 | 2.0215 | 3.3534 | 1.9282 | 2.6960 | 1.8295 | 2.1436 | 1.8081 | 2.3519 | 2.4820 | 2.4998 | 1.6461 | 2.3497 | 2.1470 | 3.5418 | 2.7519 | 2.2952 | 2.5845 |
| A_24_P58204               | OR51B5 | 2.2788 | 1.9539 | 2.3966 | 1.1637 | 3.1877 | 2.7374 | 2.5722 | 1.5547 | 2.4521 | 1.2552 | 2.1413 | 1.6362 | 1.9134 | 1.8075 | 1.7308 | 1.0936 | 2.6494 | 1.6687 | 2.0774 | 1.7777 | 3.0123 | 1.2526 | 2.6733 | 3.6464 |
| CUST_1050_PI<br>416261804 | OR51B5 | 2.0630 | 1.8760 | 2.8198 | 0.9638 | 0.9875 | 1.5722 | 2.4448 | 1.5407 | 1.9664 | 0.7432 | 1.6455 | 1.5706 | 1.7847 | 1.6737 | 1.5172 | 1.2959 | 0.9115 | 1.4828 | 1.9071 | 1.7501 | 3.1156 | 0.9283 | 1.2147 | 2.9552 |
| CUST_339_PI4<br>16573500  | OR51B6 | 2.0243 | 1.9123 | 1.5858 | 0.9745 | 1.2469 | 1.6178 | 2.3520 | 1.5556 | 1.6879 | 0.7432 | 2.9117 | 1.6087 | 1.7746 | 2.7781 | 1.3902 | 1.2937 | 0.8721 | 2.4762 | 1.8610 | 1.7355 | 2.5689 | 0.9692 | 2.0502 | 2.7395 |
| CUST_348_PI4<br>16379584  | OR51B6 | 2.3399 | 2.1235 | 2.8960 | 1.3497 | 3.2239 | 2.1441 | 2.8023 | 2.9220 | 2.1852 | 0.7432 | 3.1383 | 1.9444 | 1.9976 | 2.1010 | 2.0507 | 1.3673 | 3.3819 | 2.4468 | 2.2398 | 1.9140 | 2.5959 | 1.5906 | 3.3081 | 2.0113 |
| A_23_P24898               | OR51D1 | 1.8434 | 1.7961 | 5.7444 | 1.1180 | 2.2089 | 4.0131 | 2.0286 | 1.4216 | 1.8195 | 0.7432 | 1.2095 | 1.6233 | 1.7595 | 1.7475 | 1.5382 | 1.0235 | 0.7411 | 1.5602 | 1.7108 | 1.5700 | 1.4928 | 1.1695 | 1.2996 | 1.5812 |
| CUST_2412_PI<br>416261804 | OR51D1 | 1.9103 | 1.5845 | 2.9621 | 0.8028 | 1.6651 | 1.4688 | 2.6591 | 1.2868 | 3.0896 | 1.8299 | 2.7305 | 1.4135 | 1.8050 | 2.5275 | 3.4498 | 0.9024 | 2.3561 | 1.5701 | 1.7458 | 1.7239 | 2.8772 | 1.0761 | 1.2298 | 1.6901 |
| A_23_P13493               | OR51E1 | 1.8420 | 1.9134 | 1.4617 | 1.4683 | 1.9537 | 1.7744 | 2.0548 | 1.5612 | 1.6830 | 0.7432 | 1.6725 | 1.7016 | 1.7635 | 1.8104 | 1.5663 | 1.4214 | 0.8951 | 1.6593 | 1.6837 | 1.6974 | 1.9793 | 1.1360 | 1.9393 | 1.7274 |
| CUST_8724_PI<br>416261804 | OR51E1 | 2.6560 | 2.2040 | 3.2974 | 1.3782 | 2.7279 | 1.8622 | 2.9821 | 1.5700 | 3.1879 | 0.7432 | 2.8888 | 1.8227 | 2.1593 | 3.0723 | 2.7545 | 1.1730 | 1.2204 | 3.2721 | 2.3952 | 2.1604 | 3.1102 | 0.9897 | 2.5724 | 2.6464 |
| A_23_P139327              | OR51E2 | 2.2368 | 2.1299 | 2.2600 | 1.0774 | 2.1116 | 1.8125 | 2.5151 | 1.9225 | 2.2010 | 0.7432 | 1.8275 | 1.8917 | 1.9656 | 1.9519 | 1.5798 | 1.3685 | 2.2854 | 1.6660 | 1.9847 | 1.9824 | 1.6463 | 1.0873 | 1.7558 | 2.0822 |
| A_24_P235756              | OR51E2 | 1.8277 | 2.1279 | 1.7511 | 1.4061 | 1.1211 | 2.2019 | 1.9204 | 1.6895 | 1.5538 | 0.7432 | 1.4630 | 1.8323 | 1.6575 | 1.9839 | 1.6010 | 1.4113 | 0.7903 | 1.5976 | 1.7393 | 1.9333 | 1.4866 | 1.4711 | 1.0825 | 1.4745 |
| CUST_53_PI41<br>6573500   | OR51F1 | 1.8531 | 2.2503 | 1.6340 | 1.2555 | 2.3502 | 2.8803 | 1.7538 | 1.9834 | 1.5672 | 0.7432 | 1.7533 | 1.8851 | 1.5553 | 2.0155 | 2.7808 | 1.5129 | 1.0398 | 1.5012 | 1.7061 | 2.0826 | 1.4604 | 1.1953 | 1.0931 | 1.4319 |
| CUST_57_PI41<br>6379584   | OR51F1 | 1.9275 | 2.0323 | 1.3913 | 1.0571 | 2.7356 | 1.8180 | 2.0080 | 2.7399 | 1.6556 | 2.4204 | 1.1069 | 1.5837 | 1.6959 | 3.1037 | 1.5236 | 0.9199 | 0.6745 | 1.6307 | 1.7698 | 2.4646 | 1.8025 | 1.1551 | 1.5898 | 3.2022 |
| CUST_341_PI4<br>16573500  | OR51F2 | 1.7523 | 1.9071 | 1.4608 | 0.9419 | 0.9342 | 1.5796 | 2.0111 | 1.5329 | 1.4251 | 0.7432 | 1.3600 | 1.6484 | 1.6764 | 1.7030 | 1.5784 | 1.2038 | 0.9022 | 1.4546 | 1.6820 | 1.7928 | 1.6683 | 0.9158 | 0.9352 | 1.5891 |
| CUST_350_PI4<br>16379584  | OR51F2 | 1.6081 | 1.9524 | 1.4534 | 1.0520 | 0.8404 | 1.8072 | 1.6506 | 1.5255 | 1.4139 | 0.7432 | 1.1867 | 1.6277 | 1.5042 | 1.7106 | 1.5692 | 1.0791 | 0.6745 | 1.4263 | 1.5632 | 1.7575 | 1.3711 | 1.0897 | 0.8650 | 1.4224 |
| A_23_P105118              | OR51G1 | 1.7028 | 1.9968 | 2.2031 | 1.1697 | 3.2944 | 1.8465 | 1.7631 | 1.6487 | 1.7095 | 0.7432 | 1.4059 | 1.8051 | 1.6782 | 1.9229 | 2.2373 | 1.1636 | 0.8830 | 1.6544 | 1.6863 | 1.7919 | 2.0624 | 1.2127 | 1.9461 | 1.5278 |
| CUST_2178_PI<br>416261804 | OR51G1 | 1.7122 | 2.0189 | 1.5444 | 1.2009 | 0.7850 | 1.9467 | 1.7480 | 1.6909 | 1.5429 | 0.7432 | 1.4176 | 1.7118 | 1.5990 | 1.8564 | 1.5693 | 1.1475 | 0.7300 | 1.4714 | 1.6072 | 1.7679 | 1.4165 | 1.2328 | 1.0557 | 2.0019 |
| CUST_200_PI4<br>16573500  | OR51G2 | 1.6804 | 1.9781 | 2.8760 | 1.1259 | 3.3123 | 1.7743 | 2.3945 | 2.2395 | 3.1899 | 2.9504 | 2.2517 | 1.7390 | 1.6255 | 1.8805 | 1.9343 | 2.0226 | 2.8298 | 1.5671 | 1.7426 | 1.7602 | 3.0501 | 1.1603 | 3.6165 | 1.4730 |

|                          |        |        |        |        |        |        |        |        |        |        |        |        |        |        |        |        |        |        |        |        |        |        |        |        |        |
|--------------------------|--------|--------|--------|--------|--------|--------|--------|--------|--------|--------|--------|--------|--------|--------|--------|--------|--------|--------|--------|--------|--------|--------|--------|--------|--------|
| CUST_205_Pi4<br>16379584 | OR51G2 | 1.7368 | 1.9581 | 2.0427 | 1.2299 | 3.9297 | 1.7051 | 1.9472 | 3.4898 | 2.3965 | 3.1968 | 2.6186 | 1.6613 | 2.5090 | 1.8111 | 2.5736 | 1.1171 | 0.6933 | 1.4474 | 1.6429 | 1.7516 | 2.7920 | 1.2111 | 2.8697 | 1.4568 |
| CUST_417_Pi4<br>16573500 | OR51I1 | 1.9693 | 2.1243 | 1.9808 | 1.4943 | 1.8081 | 2.1166 | 2.1025 | 1.7271 | 2.0693 | 2.0121 | 2.6820 | 1.9336 | 1.8632 | 2.1266 | 1.7302 | 1.6156 | 1.0329 | 1.7516 | 2.4747 | 1.9135 | 2.4345 | 1.5402 | 2.7190 | 1.5909 |
| CUST_426_Pi4<br>16379584 | OR51I1 | 2.0690 | 1.9117 | 1.4838 | 1.0684 | 0.9887 | 2.0098 | 2.3869 | 1.5220 | 1.4179 | 0.7432 | 1.3356 | 1.6288 | 1.7525 | 1.7497 | 1.5233 | 1.2924 | 0.9116 | 2.8320 | 1.9822 | 1.9861 | 1.7688 | 1.0578 | 0.9239 | 3.1859 |
| CUST_458_Pi4<br>16573500 | OR51I2 | 1.6969 | 2.1117 | 1.6543 | 1.2380 | 1.1229 | 1.9126 | 1.7218 | 1.6593 | 1.5631 | 0.7432 | 1.4803 | 1.8993 | 1.6560 | 2.0139 | 1.6853 | 1.3246 | 0.8778 | 1.6051 | 1.6570 | 1.9437 | 1.5177 | 1.2653 | 1.6329 | 1.4585 |
| CUST_468_Pi4<br>16379584 | OR51I2 | 2.9473 | 2.6271 | 1.5855 | 1.0886 | 1.9758 | 1.9303 | 2.7426 | 2.7856 | 1.8412 | 3.0614 | 1.6227 | 3.2101 | 1.9292 | 1.9748 | 1.5315 | 1.4265 | 1.2066 | 1.9204 | 2.7462 | 2.4615 | 2.1851 | 2.5129 | 2.3631 | 2.2258 |
| CUST_246_Pi4<br>16573500 | OR51L1 | 2.0699 | 2.0342 | 1.6345 | 1.2574 | 0.8240 | 1.9396 | 2.2780 | 1.5881 | 1.5976 | 0.7432 | 1.5377 | 1.7508 | 1.8723 | 1.9072 | 1.6244 | 1.2485 | 0.9843 | 1.6546 | 1.9163 | 1.8286 | 1.6135 | 1.2861 | 1.3480 | 1.7737 |
| CUST_254_Pi4<br>16379584 | OR51L1 | 1.6538 | 1.8853 | 1.4662 | 1.0265 | 1.2612 | 1.6476 | 1.8584 | 1.5116 | 1.7257 | 0.7432 | 1.2858 | 1.6111 | 1.6193 | 1.7006 | 1.5745 | 1.2115 | 0.8121 | 1.5363 | 1.6005 | 1.7441 | 1.4135 | 1.0011 | 0.8645 | 1.4364 |
| CUST_343_Pi4<br>16573500 | OR51M1 | 1.6836 | 1.9975 | 1.5375 | 1.1590 | 1.8905 | 1.8106 | 1.7201 | 1.5482 | 1.7453 | 0.7432 | 1.3965 | 1.7686 | 1.6581 | 1.8465 | 1.6437 | 1.1521 | 0.8708 | 1.5308 | 1.6197 | 1.7335 | 1.6689 | 1.1515 | 1.0291 | 1.4687 |
| CUST_352_Pi4<br>16379584 | OR51M1 | 1.5435 | 1.8873 | 1.4174 | 0.8968 | 0.8079 | 1.5808 | 1.5158 | 2.5097 | 1.8543 | 0.7432 | 1.5608 | 1.8058 | 1.4889 | 1.6205 | 1.5536 | 1.0647 | 0.7378 | 1.6026 | 1.5462 | 2.0318 | 2.3427 | 1.0750 | 2.3526 | 1.6592 |
| A_23_P2180               | OR51Q1 | 1.7593 | 2.0676 | 1.7374 | 1.3940 | 1.2033 | 2.0442 | 1.8170 | 1.6494 | 1.5612 | 0.7432 | 1.5125 | 1.8881 | 1.6974 | 2.0236 | 1.6786 | 1.4482 | 0.9193 | 1.6304 | 1.8200 | 1.8924 | 1.5444 | 1.4041 | 1.0514 | 1.4628 |
| CUST_190_Pi4<br>16573500 | OR51Q1 | 2.0280 | 1.9466 | 2.4526 | 1.2563 | 2.6379 | 1.9307 | 2.2474 | 1.5581 | 2.7470 | 0.7432 | 2.9245 | 1.7681 | 1.8562 | 1.9236 | 1.8560 | 1.3533 | 0.7792 | 1.6600 | 1.9310 | 1.7583 | 2.1967 | 1.3106 | 3.4391 | 1.6559 |
| CUST_195_Pi4<br>16379584 | OR51Q1 | 1.5873 | 2.3844 | 1.4929 | 0.9977 | 0.8219 | 2.7885 | 1.6594 | 1.5380 | 1.6814 | 0.7432 | 1.1916 | 1.5840 | 1.5038 | 1.7030 | 1.5520 | 1.0569 | 0.6745 | 1.7609 | 1.9998 | 3.0061 | 1.6124 | 1.0123 | 0.8708 | 1.5901 |
| CUST_414_Pi4<br>16573500 | OR51S1 | 2.7862 | 2.6909 | 4.7549 | 3.7163 | 5.1787 | 2.6708 | 3.0970 | 3.2948 | 4.7261 | 5.2418 | 4.5371 | 2.6860 | 2.4520 | 3.0068 | 4.7564 | 2.9039 | 5.3435 | 2.5229 | 3.4183 | 3.6036 | 4.0334 | 3.7275 | 5.5886 | 3.5875 |
| CUST_423_Pi4<br>16379584 | OR51S1 | 2.0608 | 2.0797 | 2.2679 | 0.7920 | 0.7006 | 2.4073 | 2.4081 | 1.4157 | 1.6802 | 1.2152 | 1.0587 | 1.4135 | 1.7055 | 1.8381 | 1.3661 | 0.9270 | 0.7105 | 1.4773 | 1.7372 | 1.4951 | 3.0400 | 0.7432 | 0.9409 | 3.6148 |
| CUST_192_Pi4<br>16573500 | OR51T1 | 1.7126 | 1.9269 | 2.0744 | 1.1664 | 3.1655 | 1.8681 | 1.7318 | 1.4972 | 2.0456 | 0.7432 | 1.2825 | 1.7673 | 1.6809 | 1.8675 | 2.3551 | 1.0472 | 0.7495 | 1.6339 | 1.6338 | 1.6780 | 1.5290 | 1.2171 | 1.7346 | 1.5311 |
| CUST_197_Pi4<br>16379584 | OR51T1 | 2.0569 | 2.3491 | 2.4074 | 2.1469 | 3.4963 | 2.0916 | 2.2026 | 1.9765 | 2.4197 | 1.8567 | 2.7058 | 2.0943 | 1.8476 | 2.1519 | 2.3305 | 1.3737 | 1.0877 | 1.9551 | 1.9463 | 2.1523 | 1.5993 | 1.3541 | 5.3610 | 1.8193 |
| CUST_423_Pi4<br>16573500 | OR51V1 | 2.1719 | 2.1124 | 1.8846 | 2.1564 | 1.6900 | 1.8590 | 2.5156 | 2.9952 | 1.5952 | 1.4060 | 2.1654 | 1.7270 | 1.8318 | 2.9952 | 1.5881 | 1.2986 | 0.8125 | 1.6189 | 2.1825 | 1.9078 | 1.7278 | 2.1648 | 1.1355 | 1.8705 |
| CUST_432_Pi4<br>16379584 | OR51V1 | 2.0330 | 3.0082 | 1.5638 | 2.1274 | 1.4706 | 2.4612 | 2.2037 | 2.7399 | 1.5364 | 1.6572 | 1.6549 | 1.8006 | 1.6974 | 1.9580 | 1.5812 | 1.2592 | 1.0080 | 1.6963 | 2.2095 | 2.1065 | 1.6365 | 1.3163 | 1.6973 | 2.5876 |
| A_23_P125286             | OR52A1 | 1.7857 | 1.9608 | 2.0658 | 1.2009 | 1.0426 | 1.8515 | 1.9523 | 1.5333 | 2.0058 | 0.7432 | 1.3488 | 1.7809 | 1.6962 | 1.8732 | 1.7006 | 1.2811 | 0.8030 | 1.5581 | 1.7087 | 1.8137 | 1.6194 | 1.2210 | 2.2976 | 1.4809 |
| CUST_995_Pi4<br>16261804 | OR52A1 | 2.2729 | 2.2666 | 2.5391 | 2.7786 | 2.4812 | 2.6532 | 2.4548 | 3.1099 | 2.0358 | 1.3089 | 1.6186 | 1.8694 | 1.9017 | 2.8479 | 1.9413 | 2.9852 | 1.0355 | 1.7697 | 2.0250 | 2.0759 | 2.7504 | 1.3156 | 1.4366 | 1.8919 |
| CUST_37_Pi41<br>6573500  | OR52A4 | 1.7369 | 2.2005 | 1.7245 | 1.3344 | 1.0690 | 1.9518 | 1.7921 | 1.9169 | 1.6919 | 0.7432 | 1.7412 | 2.0322 | 1.7240 | 2.1380 | 1.8356 | 1.4795 | 1.2678 | 1.7477 | 1.6440 | 2.0312 | 1.4855 | 1.3190 | 1.1822 | 1.5576 |
| CUST_39_Pi41<br>6379584  | OR52A4 | 1.6323 | 1.9332 | 1.4867 | 1.0919 | 0.9274 | 1.7848 | 1.6584 | 1.5141 | 1.4498 | 0.7432 | 1.2668 | 1.7152 | 1.5527 | 1.7747 | 1.6974 | 1.1334 | 2.3792 | 1.4805 | 1.5903 | 1.7845 | 1.4100 | 1.1203 | 0.9335 | 1.4467 |
| CUST_277_Pi4<br>16573500 | OR52A5 | 2.1028 | 2.2868 | 2.0466 | 1.3153 | 3.2869 | 1.9617 | 2.3110 | 2.3447 | 2.4152 | 0.7432 | 1.7539 | 3.2034 | 1.8198 | 2.0226 | 1.7529 | 1.3816 | 1.0368 | 2.0072 | 1.8956 | 2.0811 | 2.5241 | 1.2864 | 2.2287 | 1.9207 |
| CUST_285_Pi4<br>16379584 | OR52A5 | 1.8268 | 2.1912 | 1.5892 | 1.1820 | 1.1076 | 1.8841 | 2.0260 | 1.8720 | 1.5107 | 0.7432 | 1.6295 | 1.7727 | 1.6444 | 1.9216 | 1.6042 | 1.4866 | 0.9526 | 1.6538 | 1.8145 | 2.0262 | 1.3989 | 1.1848 | 1.0609 | 2.5966 |
| A_23_P36203              | OR52B2 | 1.6570 | 2.0163 | 1.8174 | 1.1325 | 2.4564 | 1.8710 | 1.7021 | 2.4969 | 2.2344 | 2.3465 | 1.3172 | 1.7838 | 1.6070 | 2.0866 | 1.7882 | 1.1887 | 2.9289 | 1.5360 | 1.6141 | 1.8714 | 1.4786 | 1.1368 | 2.2653 | 1.4728 |

|                           |        |        |        |        |        |        |        |        |        |        |        |        |        |        |        |        |        |        |        |        |        |        |        |        |        |
|---------------------------|--------|--------|--------|--------|--------|--------|--------|--------|--------|--------|--------|--------|--------|--------|--------|--------|--------|--------|--------|--------|--------|--------|--------|--------|--------|
| CUST_1006_PI<br>416261804 | OR52B2 | 1.7005 | 1.7278 | 1.4019 | 0.9482 | 0.7340 | 1.6389 | 1.9055 | 1.3514 | 1.7090 | 0.7432 | 1.0634 | 1.5244 | 1.6895 | 1.6181 | 1.5400 | 1.2810 | 0.6916 | 1.6072 | 1.6275 | 1.5403 | 1.9330 | 1.0090 | 0.9162 | 1.5322 |
| CUST_530_PI4<br>16573500  | OR52B4 | 1.7392 | 2.1438 | 1.5514 | 1.2045 | 0.8420 | 1.9609 | 1.8107 | 1.7305 | 1.5495 | 0.7432 | 1.4933 | 1.7811 | 1.6412 | 1.8590 | 1.5507 | 1.2054 | 0.7363 | 5.0219 | 1.6614 | 1.8317 | 1.4593 | 1.2388 | 1.0799 | 1.4725 |
| CUST_542_PI4<br>16379584  | OR52B4 | 1.9663 | 1.9893 | 1.6489 | 0.9919 | 0.9340 | 2.1405 | 2.5714 | 1.6195 | 1.6384 | 0.7432 | 1.3660 | 2.9107 | 1.6812 | 1.6878 | 1.4590 | 1.2723 | 0.7842 | 1.9541 | 1.9481 | 2.7696 | 2.3238 | 2.8203 | 0.9228 | 1.6459 |
| CUST_555_PI4<br>16573500  | OR52B6 | 5.8248 | 3.3224 | 5.1790 | 3.4560 | 6.5649 | 3.9397 | 4.9538 | 5.9287 | 5.2621 | 4.6704 | 5.4512 | 1.4985 | 3.9371 | 5.4145 | 4.4207 | 3.4950 | 4.5347 | 2.1943 | 5.2443 | 2.7182 | 5.7162 | 3.6219 | 5.6797 | 3.3505 |
| CUST_571_PI4<br>16379584  | OR52B6 | 2.4346 | 2.5208 | 1.4622 | 1.0272 | 0.9271 | 1.8239 | 2.5446 | 1.5304 | 1.3811 | 0.7432 | 1.2907 | 1.9031 | 1.7892 | 1.6682 | 1.4340 | 1.2474 | 0.7964 | 1.6199 | 2.0341 | 1.7388 | 2.0409 | 2.1098 | 0.9486 | 1.8008 |
| CUST_390_PI4<br>16573500  | OR52D1 | 1.6188 | 1.8351 | 1.4322 | 0.9389 | 0.8206 | 1.5710 | 1.7942 | 1.4677 | 1.4488 | 0.7432 | 1.2472 | 1.5821 | 2.7651 | 2.8055 | 1.6011 | 1.0759 | 0.8240 | 1.4394 | 1.6240 | 1.7140 | 1.3888 | 0.9322 | 0.9172 | 1.4711 |
| CUST_399_PI4<br>16379584  | OR52D1 | 3.6757 | 2.0204 | 1.5530 | 1.1447 | 1.0331 | 1.8096 | 2.2989 | 1.6189 | 1.4912 | 0.7432 | 1.4238 | 1.7110 | 1.8018 | 2.5389 | 1.5962 | 1.3343 | 0.9878 | 1.6024 | 2.0729 | 2.4180 | 1.5382 | 1.1998 | 1.1288 | 1.7933 |
| CUST_169_PI4<br>16573500  | OR52E2 | 1.8559 | 2.3712 | 1.7755 | 1.4295 | 1.7978 | 2.1427 | 1.8891 | 1.8544 | 1.7232 | 0.8901 | 1.8160 | 2.1167 | 1.7311 | 2.1238 | 2.1284 | 1.3926 | 1.1406 | 1.8384 | 1.7706 | 2.2253 | 1.6032 | 1.4939 | 2.2703 | 2.1218 |
| CUST_174_PI4<br>16379584  | OR52E2 | 2.6216 | 2.5934 | 2.3894 | 1.0790 | 0.7880 | 1.8133 | 2.5499 | 2.9165 | 2.3173 | 3.3185 | 1.5315 | 3.4219 | 1.7716 | 1.7814 | 1.4059 | 1.2375 | 0.8376 | 3.1010 | 2.5463 | 3.1661 | 3.1548 | 3.0992 | 1.1053 | 2.6440 |
| CUST_280_PI4<br>16573500  | OR52E4 | 1.8945 | 2.3861 | 1.7207 | 1.4203 | 1.0066 | 2.2269 | 1.9351 | 1.8483 | 1.6317 | 1.5287 | 1.7054 | 1.9476 | 1.7302 | 2.1037 | 1.7534 | 1.3264 | 0.9340 | 1.7010 | 1.7120 | 2.1094 | 1.5954 | 1.5039 | 1.3199 | 1.6510 |
| CUST_288_PI4<br>16379584  | OR52E4 | 2.3744 | 2.2751 | 2.2886 | 2.7695 | 1.0441 | 2.0123 | 2.3225 | 3.7627 | 1.8624 | 0.7432 | 1.6749 | 1.7182 | 2.5024 | 3.2280 | 1.5389 | 1.2844 | 1.1157 | 1.9921 | 2.2138 | 3.8092 | 3.0267 | 2.5517 | 1.1744 | 3.7608 |
| CUST_173_PI4<br>16573500  | OR52E6 | 1.7732 | 2.1882 | 1.6948 | 1.3043 | 1.0929 | 1.8598 | 1.9400 | 1.8684 | 2.1069 | 0.7432 | 1.7077 | 1.9645 | 1.6810 | 2.1011 | 1.8852 | 1.4634 | 1.1786 | 1.6706 | 1.6249 | 2.0130 | 2.0424 | 1.2553 | 1.1250 | 1.5061 |
| CUST_178_PI4<br>16379584  | OR52E6 | 1.8650 | 1.7433 | 1.6071 | 1.4781 | 0.7258 | 1.8017 | 3.1290 | 1.4460 | 1.3427 | 0.7432 | 1.1137 | 1.4157 | 1.5984 | 1.4516 | 1.3805 | 0.9672 | 0.6954 | 1.4110 | 1.6682 | 2.6320 | 2.7058 | 1.1024 | 0.7949 | 2.3313 |
| CUST_326_PI4<br>16573500  | OR52E8 | 1.9323 | 2.3470 | 1.7913 | 1.3317 | 1.3390 | 2.7356 | 2.0043 | 1.8139 | 1.8178 | 0.8575 | 1.7957 | 2.1449 | 1.7740 | 2.1059 | 1.9157 | 1.3839 | 1.2932 | 1.8896 | 1.9910 | 2.2696 | 1.6888 | 1.3468 | 1.4486 | 1.6699 |
| CUST_335_PI4<br>16379584  | OR52E8 | 2.7171 | 2.3799 | 4.3256 | 5.2054 | 5.2760 | 4.9296 | 4.1110 | 3.0748 | 4.1171 | 5.1926 | 5.3154 | 5.6897 | 1.8131 | 5.1226 | 1.8948 | 4.2346 | 1.1733 | 5.4739 | 4.1296 | 2.1278 | 4.9591 | 3.8825 | 5.7999 | 5.3317 |
| CUST_142_PI4<br>16573500  | OR52H1 | 2.1923 | 2.1252 | 1.6549 | 1.2491 | 1.5126 | 1.8773 | 2.3153 | 1.6480 | 2.4377 | 2.1136 | 1.5968 | 1.7852 | 1.8345 | 1.9321 | 1.6652 | 1.3175 | 0.9890 | 1.5861 | 1.9090 | 1.8701 | 1.8739 | 2.1616 | 1.2774 | 1.7139 |
| CUST_147_PI4<br>16379584  | OR52H1 | 2.5743 | 1.8483 | 1.3903 | 0.8607 | 1.1267 | 3.2401 | 2.8146 | 1.5033 | 1.3816 | 0.7432 | 1.1728 | 1.7730 | 3.1713 | 1.5295 | 1.4362 | 1.0046 | 0.6987 | 2.3066 | 2.4232 | 2.2836 | 1.9731 | 0.7432 | 0.8976 | 2.9440 |
| CUST_465_PI4<br>16573500  | OR52I1 | 1.8322 | 2.1281 | 1.7468 | 1.4943 | 1.2917 | 2.1281 | 1.9154 | 1.7233 | 1.6455 | 0.7432 | 1.5988 | 1.9391 | 1.7567 | 2.1160 | 1.6963 | 1.5710 | 0.9989 | 1.7128 | 2.7194 | 1.9207 | 1.6049 | 1.5470 | 1.1405 | 1.5035 |
| CUST_475_PI4<br>16379584  | OR52I1 | 1.5748 | 1.8466 | 1.6350 | 0.9385 | 1.9128 | 1.7740 | 1.8239 | 1.8362 | 1.7761 | 0.7432 | 1.3122 | 1.5284 | 1.5681 | 1.6613 | 1.6163 | 1.1036 | 0.8286 | 1.5848 | 1.5176 | 1.6613 | 2.3544 | 0.8652 | 1.1115 | 1.8647 |
| CUST_466_PI4<br>16573500  | OR52I2 | 1.7074 | 1.9941 | 1.5787 | 1.2101 | 1.9322 | 1.8565 | 1.7809 | 1.6412 | 1.9347 | 0.7432 | 1.4901 | 1.7278 | 1.6413 | 1.8775 | 1.6295 | 1.2152 | 0.8807 | 5.0546 | 1.6025 | 1.7772 | 1.4438 | 1.2034 | 1.0975 | 1.4566 |
| CUST_476_PI4<br>16379584  | OR52I2 | 2.2264 | 2.2519 | 1.6381 | 1.1132 | 1.2662 | 1.6762 | 2.5487 | 1.8716 | 2.1007 | 0.7432 | 2.8266 | 1.8893 | 1.8563 | 1.9233 | 1.8053 | 1.4950 | 1.4353 | 1.6191 | 2.0239 | 2.1886 | 2.2501 | 1.0019 | 1.3224 | 2.0617 |
| CUST_449_PI4<br>16573500  | OR52I3 | 1.8929 | 2.1126 | 1.7631 | 1.4912 | 1.3452 | 2.1324 | 2.0016 | 1.7182 | 1.6498 | 0.7432 | 1.6125 | 1.9276 | 1.8069 | 2.1093 | 1.7287 | 1.6218 | 1.0957 | 1.7213 | 1.8174 | 1.9339 | 1.6116 | 1.5407 | 1.1375 | 1.5335 |
| CUST_458_PI4<br>16379584  | OR52I3 | 1.8699 | 2.0531 | 1.6723 | 0.9438 | 0.7585 | 1.6220 | 2.5605 | 1.7142 | 1.4632 | 0.7432 | 1.3940 | 1.6173 | 1.6815 | 1.6791 | 1.4730 | 1.1019 | 0.8333 | 1.6009 | 1.7662 | 1.7890 | 2.3539 | 0.8816 | 0.9702 | 2.2755 |
| CUST_327_PI4<br>16573500  | OR52K1 | 1.7033 | 1.6752 | 1.3717 | 0.8410 | 1.5079 | 1.5210 | 1.9711 | 1.3421 | 1.4570 | 0.7432 | 1.0511 | 1.4520 | 1.6792 | 1.5293 | 1.4943 | 0.9301 | 0.6745 | 1.4606 | 1.6156 | 1.5100 | 2.6211 | 1.0746 | 0.8798 | 1.5482 |

|                           |        |        |        |        |        |        |        |        |        |        |        |        |        |        |        |        |        |        |        |        |        |        |        |        |        |
|---------------------------|--------|--------|--------|--------|--------|--------|--------|--------|--------|--------|--------|--------|--------|--------|--------|--------|--------|--------|--------|--------|--------|--------|--------|--------|--------|
| CUST_336_Pi4<br>16379584  | OR52K1 | 1.8822 | 1.9915 | 1.4233 | 0.9340 | 1.0499 | 1.5470 | 2.2203 | 1.5559 | 1.4346 | 0.7432 | 1.5418 | 1.6171 | 1.7447 | 1.6832 | 1.4988 | 1.2839 | 0.9228 | 1.4392 | 1.7499 | 1.7109 | 2.8699 | 0.8787 | 0.9794 | 1.9485 |
|                           |        |        |        |        |        |        |        |        |        |        |        |        |        |        |        |        |        |        |        |        |        |        |        |        |        |
| A_23_P98744               | OR52K2 | 3.1524 | 2.5483 | 4.4692 | 4.2791 | 5.3539 | 2.6335 | 3.4825 | 4.1649 | 4.5352 | 5.5518 | 4.4952 | 2.1603 | 4.1785 | 3.5218 | 4.0351 | 4.1327 | 3.9295 | 2.1594 | 3.4418 | 3.5865 | 4.2760 | 4.1998 | 5.2549 | 3.3350 |
| CUST_2283_Pi<br>416261804 | OR52K2 | 3.6564 | 3.1500 | 4.6607 | 3.9582 | 5.0969 | 2.9080 | 3.9998 | 3.1439 | 4.4723 | 4.9081 | 3.5118 | 2.4586 | 3.4686 | 2.0601 | 4.5935 | 3.0683 | 4.1391 | 2.5636 | 3.5697 | 3.6360 | 4.1825 | 4.0037 | 4.8442 | 3.7921 |
| CUST_929_Pi4<br>16573500  | OR52L1 | 2.1228 | 2.2634 | 1.7909 | 2.3686 | 0.9636 | 2.1633 | 2.2567 | 1.6665 | 2.0535 | 0.7432 | 1.6802 | 1.9620 | 1.9144 | 2.0772 | 1.8071 | 1.3442 | 0.9987 | 1.8075 | 2.5609 | 1.9883 | 1.9561 | 1.5008 | 1.4530 | 1.8254 |
| CUST_960_Pi4<br>16379584  | OR52L1 | 1.6621 | 1.8026 | 1.6467 | 1.0551 | 2.3917 | 1.7317 | 1.7406 | 1.4749 | 1.6656 | 0.7432 | 1.1910 | 1.5881 | 1.6123 | 1.7178 | 1.5536 | 1.0019 | 0.7095 | 1.4599 | 1.5727 | 1.5896 | 1.9074 | 1.0803 | 0.9573 | 1.4548 |
| CUST_469_Pi4<br>16573500  | OR52M1 | 1.8972 | 2.1165 | 1.7397 | 1.3803 | 0.8948 | 2.0654 | 1.9788 | 1.6365 | 1.6848 | 0.7432 | 1.6000 | 1.8556 | 2.0763 | 2.0059 | 1.7213 | 1.2942 | 0.9939 | 1.6960 | 1.7620 | 1.8883 | 1.7403 | 1.4093 | 1.3492 | 1.6080 |
| CUST_479_Pi4<br>16379584  | OR52M1 | 1.8809 | 3.1105 | 1.9595 | 0.9604 | 2.1745 | 1.6638 | 2.1724 | 2.3836 | 1.6729 | 2.4580 | 1.8835 | 1.6768 | 1.6928 | 2.2087 | 1.4866 | 1.2239 | 2.3501 | 2.0059 | 2.9381 | 3.1186 | 2.1621 | 0.9461 | 2.3338 | 2.2894 |
| CUST_366_Pi4<br>16573500  | OR52N1 | 3.1920 | 2.1841 | 3.0072 | 1.3399 | 3.0480 | 2.1414 | 2.2368 | 1.7422 | 2.3728 | 0.7432 | 2.2559 | 1.9477 | 2.4170 | 3.2544 | 2.2181 | 1.5121 | 2.3065 | 1.7448 | 1.8680 | 2.6398 | 1.9871 | 1.5726 | 2.6289 | 1.7441 |
| CUST_375_Pi4<br>16379584  | OR52N1 | 1.7553 | 1.9982 | 1.8891 | 1.0359 | 0.7512 | 1.7259 | 1.9752 | 1.6372 | 1.4522 | 0.7432 | 1.3173 | 1.5368 | 1.6227 | 1.6989 | 1.4698 | 1.0776 | 0.7178 | 1.5148 | 1.5855 | 1.6951 | 1.7516 | 1.0181 | 0.9768 | 1.6097 |
| CUST_328_Pi4<br>16573500  | OR52N2 | 5.3709 | 4.7276 | 5.5084 | 4.8694 | 5.8559 | 4.9342 | 4.8960 | 5.4838 | 5.5433 | 5.3530 | 4.8103 | 5.1189 | 3.5989 | 5.1023 | 5.6985 | 4.3416 | 4.8043 | 5.0156 | 5.1298 | 5.2750 | 5.0018 | 4.7943 | 5.5095 | 4.9692 |
| CUST_337_Pi4<br>16379584  | OR52N2 | 1.7428 | 1.9479 | 1.5495 | 0.9431 | 0.8441 | 1.6915 | 2.1761 | 1.6289 | 1.4006 | 0.7432 | 1.3188 | 1.5523 | 1.6047 | 1.6412 | 1.4552 | 1.0746 | 0.7405 | 1.4397 | 1.6122 | 1.7855 | 1.6359 | 0.9748 | 0.9619 | 2.2910 |
| CUST_930_Pi4<br>16573500  | OR52N4 | 1.6043 | 1.8732 | 2.0246 | 1.0220 | 1.7782 | 1.6066 | 1.7247 | 1.8162 | 1.5127 | 0.7432 | 2.6018 | 1.5909 | 1.5931 | 2.5472 | 1.6535 | 1.1026 | 0.7922 | 1.4256 | 1.5417 | 1.7181 | 1.8453 | 0.9831 | 1.8929 | 1.4246 |
| CUST_961_Pi4<br>16379584  | OR52N4 | 3.0394 | 2.1438 | 3.5839 | 3.3108 | 2.1404 | 2.9654 | 3.5403 | 1.5830 | 2.5140 | 3.1357 | 2.2099 | 4.9272 | 2.5285 | 2.0091 | 1.6901 | 4.3900 | 1.4794 | 3.0650 | 3.0886 | 1.9221 | 3.4524 | 1.6388 | 1.8530 | 4.2490 |
| CUST_210_Pi4<br>16573500  | OR52N5 | 1.6372 | 1.8261 | 1.7950 | 1.0174 | 1.2362 | 1.6671 | 1.7505 | 1.4713 | 2.0178 | 0.7432 | 2.1745 | 1.6187 | 1.6329 | 1.7393 | 1.6330 | 1.0439 | 0.7469 | 1.5121 | 1.5755 | 1.6330 | 2.5619 | 1.0439 | 1.8194 | 1.4616 |
| CUST_216_Pi4<br>16379584  | OR52N5 | 1.9974 | 2.2256 | 2.5369 | 2.6677 | 1.4943 | 2.6135 | 2.5830 | 1.8181 | 1.7016 | 1.7872 | 2.1555 | 1.8478 | 1.7044 | 1.8999 | 1.7197 | 1.3829 | 2.1383 | 1.6798 | 1.8872 | 2.8573 | 2.8460 | 3.4590 | 2.0171 | 1.7023 |
| CUST_289_Pi4<br>16573500  | OR52R1 | 3.7924 | 2.2849 | 4.3343 | 3.5865 | 4.9691 | 2.2772 | 3.9456 | 3.1521 | 4.4688 | 4.3188 | 3.9686 | 1.8637 | 2.4535 | 3.4034 | 4.6368 | 2.7730 | 4.0738 | 2.5620 | 3.3224 | 3.1805 | 3.9407 | 1.7634 | 5.0586 | 1.9947 |
| CUST_297_Pi4<br>16379584  | OR52R1 | 1.9985 | 1.7530 | 2.0084 | 0.8414 | 0.8462 | 1.4337 | 2.3271 | 1.4632 | 1.3374 | 0.7432 | 1.2200 | 1.4551 | 1.6997 | 1.4876 | 1.3996 | 1.1105 | 0.8056 | 1.4186 | 1.8068 | 1.6468 | 3.1464 | 0.7432 | 0.8516 | 1.7917 |
| CUST_330_Pi4<br>16573500  | OR52W1 | 5.1912 | 4.1953 | 6.0077 | 5.0389 | 6.1451 | 5.1441 | 5.3245 | 5.1718 | 6.0315 | 5.2731 | 4.9364 | 5.1731 | 4.6054 | 5.0007 | 5.8228 | 3.8120 | 4.9940 | 4.5841 | 5.9065 | 4.6152 | 5.6202 | 5.0603 | 5.8817 | 5.2572 |
| CUST_339_Pi4<br>16379584  | OR52W1 | 2.0934 | 2.0925 | 2.3600 | 1.2330 | 3.5471 | 1.9422 | 2.3201 | 1.8362 | 2.7352 | 0.7432 | 2.2241 | 1.9247 | 1.9006 | 2.0352 | 1.7468 | 1.3314 | 1.0359 | 1.7983 | 2.4495 | 1.9239 | 1.8501 | 1.3034 | 2.9935 | 1.8966 |
| CUST_209_Pi4<br>16573500  | OR56A1 | 1.6903 | 2.1383 | 1.6784 | 1.2594 | 1.1872 | 1.9126 | 1.7070 | 1.6927 | 1.5840 | 0.7432 | 2.3714 | 1.9378 | 4.5546 | 2.0311 | 1.7729 | 1.3498 | 0.9197 | 1.6091 | 1.6463 | 1.9944 | 1.5209 | 1.2580 | 1.9294 | 1.4665 |
| CUST_214_Pi4<br>16379584  | OR56A1 | 2.0753 | 2.3851 | 3.8929 | 1.1505 | 0.8774 | 1.8992 | 1.5034 | 2.6379 | 1.7315 | 1.9451 | 1.6982 | 2.7128 | 1.5038 | 1.9466 | 1.6417 | 1.3346 | 1.0589 | 1.5428 | 1.6060 | 2.0508 | 3.1053 | 2.0711 | 4.1454 | 1.5633 |
| CUST_573_Pi4<br>16573500  | OR56A3 | 1.7675 | 2.1056 | 1.6347 | 1.3642 | 1.1465 | 2.0939 | 1.8359 | 1.6906 | 1.5375 | 0.7432 | 1.4940 | 1.8397 | 1.6529 | 1.9752 | 1.6731 | 1.4043 | 0.8502 | 1.6061 | 1.7099 | 1.9463 | 1.5064 | 1.3974 | 1.0493 | 1.4892 |
| CUST_589_Pi4<br>16379584  | OR56A3 | 1.8123 | 1.8466 | 2.0531 | 0.9184 | 0.8862 | 1.5481 | 2.1386 | 1.4967 | 1.3554 | 0.7432 | 1.2382 | 1.5327 | 1.7293 | 1.5922 | 1.4668 | 1.1739 | 0.7654 | 2.6415 | 1.8668 | 1.7071 | 2.5819 | 0.8816 | 0.8550 | 1.7864 |
| CUST_437_Pi4<br>16573500  | OR56A4 | 1.8196 | 2.3284 | 2.9551 | 1.2403 | 1.6042 | 2.1487 | 1.8590 | 1.7507 | 3.5998 | 0.8293 | 1.6094 | 2.0169 | 1.7871 | 2.0731 | 2.7609 | 1.2516 | 1.1265 | 1.9188 | 1.7840 | 2.2634 | 3.7530 | 1.2959 | 2.6343 | 1.6972 |

|                            |        |        |        |        |        |        |        |        |        |        |        |        |        |        |        |        |        |        |        |        |        |        |        |        |        |
|----------------------------|--------|--------|--------|--------|--------|--------|--------|--------|--------|--------|--------|--------|--------|--------|--------|--------|--------|--------|--------|--------|--------|--------|--------|--------|--------|
| CUST_446_Pi4<br>16379584   | OR56A4 | 1.9036 | 1.9139 | 1.4952 | 1.0523 | 1.0267 | 1.9685 | 2.2171 | 1.5643 | 1.4286 | 0.7432 | 1.3990 | 1.6265 | 1.7293 | 1.7398 | 1.5323 | 1.3384 | 0.9598 | 1.5308 | 1.7897 | 1.7792 | 2.0781 | 0.9918 | 0.9017 | 1.6112 |
| CUST_1132_Pi<br>416573500  | OR56A5 | 1.6373 | 1.7412 | 1.3884 | 0.9685 | 1.0863 | 1.6625 | 1.7352 | 1.9849 | 1.6366 | 0.7432 | 1.0654 | 1.5400 | 1.6149 | 1.6367 | 2.6843 | 0.9361 | 0.6745 | 1.4883 | 1.5804 | 1.5500 | 2.5646 | 1.0364 | 0.9055 | 1.4633 |
| CUST_1170_Pi<br>416379584  | OR56A5 | 1.7910 | 1.7665 | 2.3833 | 0.8677 | 0.7026 | 1.4459 | 2.1687 | 1.4873 | 1.4035 | 1.2345 | 1.2474 | 1.4594 | 1.6950 | 1.5509 | 1.4547 | 1.0546 | 0.8979 | 1.4142 | 1.6467 | 1.5672 | 2.7302 | 0.7432 | 0.8734 | 1.8187 |
| A_23_P139250               | OR56B1 | 1.7968 | 1.9429 | 1.5181 | 1.1938 | 0.9188 | 1.9302 | 1.9381 | 1.4973 | 1.4492 | 0.7432 | 1.2462 | 1.7152 | 1.7161 | 1.8352 | 1.6203 | 1.1534 | 0.7100 | 1.6431 | 1.7355 | 1.7570 | 1.5284 | 1.2897 | 1.0319 | 1.5665 |
| CUST_4745_Pi<br>416261804  | OR56B1 | 1.8365 | 2.4435 | 2.8367 | 1.7963 | 2.7011 | 2.2356 | 1.8338 | 3.1230 | 1.5282 | 0.7432 | 1.2747 | 1.7040 | 1.6506 | 1.8171 | 1.5224 | 1.0710 | 0.7277 | 2.4245 | 2.4978 | 2.6781 | 1.5039 | 1.9528 | 1.8033 | 1.4619 |
| CUST_395_Pi4<br>16573500   | OR56B4 | 2.0243 | 1.8022 | 1.4463 | 0.9435 | 0.7748 | 1.5797 | 1.7195 | 1.4269 | 1.6823 | 0.7432 | 1.1742 | 1.5581 | 1.5910 | 1.6230 | 1.5945 | 2.5517 | 0.7539 | 1.4324 | 1.5584 | 1.6592 | 1.4006 | 0.9455 | 0.8845 | 1.4294 |
| CUST_404_Pi4<br>16379584   | OR56B4 | 1.8597 | 2.0302 | 1.5646 | 1.1473 | 1.1784 | 2.3057 | 2.0429 | 2.8810 | 2.4555 | 0.7432 | 1.4328 | 1.7502 | 1.7398 | 1.8231 | 1.5922 | 1.1949 | 0.8765 | 1.5324 | 1.7355 | 1.7413 | 1.5192 | 1.1348 | 1.1876 | 1.5423 |
| A_23_P75764                | OR5A1  | 2.5670 | 2.4063 | 3.9352 | 2.2319 | 5.1970 | 2.3522 | 2.8118 | 3.5090 | 4.0921 | 4.3020 | 3.9607 | 2.1167 | 2.5113 | 3.5463 | 4.4720 | 3.7967 | 2.8479 | 1.9361 | 3.0038 | 2.6758 | 4.2766 | 2.4760 | 4.6458 | 2.4319 |
| CUST_2295_Pi<br>416261804  | OR5A1  | 3.4272 | 2.2696 | 3.1907 | 1.3108 | 1.0280 | 1.8521 | 2.7677 | 2.3981 | 2.7434 | 2.2028 | 1.6988 | 1.7680 | 1.8382 | 1.8179 | 1.5859 | 1.2988 | 2.1853 | 1.6005 | 2.1033 | 2.6861 | 4.1223 | 2.1916 | 2.7319 | 2.9308 |
| CUST_159_Pi4<br>16573500   | OR5A2  | 2.4730 | 2.2927 | 2.6045 | 1.2262 | 3.2472 | 4.0021 | 2.6491 | 2.8944 | 2.7091 | 3.0208 | 2.5813 | 2.9240 | 1.9655 | 1.9131 | 1.7298 | 1.2136 | 0.7332 | 2.0190 | 2.5754 | 1.8992 | 2.6669 | 1.3104 | 2.9656 | 2.1030 |
| CUST_164_Pi4<br>16379584   | OR5A2  | 2.1551 | 3.2450 | 2.6741 | 0.9290 | 0.9465 | 1.6140 | 1.8167 | 2.9594 | 1.7242 | 0.9331 | 1.3638 | 2.2256 | 1.5961 | 2.2329 | 1.6619 | 1.0910 | 0.8556 | 2.7315 | 1.6204 | 3.2610 | 3.2289 | 2.4213 | 0.9248 | 1.5338 |
| CUST_406_Pi4<br>16573500   | OR5AC2 | 1.9183 | 2.4472 | 1.6989 | 1.3344 | 0.9840 | 2.1242 | 1.8964 | 2.1185 | 1.6370 | 0.7432 | 1.7176 | 2.0106 | 1.7625 | 2.6921 | 1.7635 | 1.3510 | 0.8202 | 1.7426 | 1.8513 | 2.5809 | 1.6523 | 1.4123 | 1.2830 | 1.6604 |
| CUST_415_Pi4<br>16379584   | OR5AC2 | 1.6574 | 2.0818 | 1.5146 | 1.1591 | 0.9112 | 1.9052 | 1.7205 | 1.6922 | 1.6183 | 0.7432 | 1.3767 | 1.7364 | 1.5439 | 1.8686 | 1.6542 | 1.1933 | 0.7223 | 1.6643 | 1.6334 | 1.8716 | 1.4107 | 1.8999 | 0.9769 | 1.4566 |
| A_23_P1863                 | OR5AK2 | 1.6367 | 1.9889 | 1.4759 | 1.1175 | 0.8138 | 1.8506 | 1.6841 | 1.6548 | 1.4644 | 0.7432 | 1.3184 | 1.7044 | 1.5349 | 1.8190 | 1.6376 | 1.0832 | 0.7026 | 1.4953 | 1.5722 | 1.7737 | 1.3833 | 1.1524 | 0.9638 | 1.4641 |
| CUST_1666_Pi<br>416261804  | OR5AK2 | 2.1644 | 2.5129 | 2.6430 | 1.2509 | 2.8398 | 1.9897 | 2.3718 | 2.0550 | 2.6688 | 0.7432 | 2.2599 | 1.7057 | 2.3681 | 1.9602 | 1.4727 | 1.4276 | 2.6269 | 1.7834 | 2.6000 | 3.5931 | 2.8307 | 1.3115 | 2.5844 | 2.6072 |
| CUST_238_Pi4<br>16573500   | OR5AN1 | 1.8219 | 2.1258 | 1.7673 | 1.3812 | 0.8266 | 2.1299 | 1.7590 | 3.1170 | 1.6823 | 0.7432 | 1.5029 | 1.8814 | 1.7356 | 2.0105 | 1.6957 | 1.2312 | 0.8846 | 1.7147 | 1.7204 | 2.8460 | 1.5888 | 1.4865 | 1.2642 | 1.5495 |
| CUST_245_Pi4<br>16379584   | OR5AN1 | 1.8794 | 2.2828 | 1.8016 | 1.2076 | 1.1332 | 1.9907 | 2.1764 | 1.8152 | 1.5389 | 0.7432 | 1.6464 | 1.8531 | 1.6899 | 1.9495 | 1.6701 | 1.2697 | 0.9715 | 1.6471 | 1.7419 | 2.0828 | 1.4284 | 1.2656 | 1.2569 | 1.6629 |
| A_23_P47464                | OR5AP2 | 1.8317 | 2.1270 | 1.8396 | 1.4913 | 1.3173 | 2.1043 | 1.9118 | 1.7191 | 1.6612 | 0.7432 | 1.6060 | 1.9468 | 1.7755 | 2.1266 | 1.7240 | 1.5887 | 1.0268 | 1.7232 | 3.9838 | 1.9180 | 1.6197 | 1.5374 | 1.3069 | 1.5043 |
| CUST_11239_P<br>i416261804 | OR5AP2 | 2.9972 | 4.0487 | 3.3835 | 4.1130 | 4.7119 | 2.3431 | 3.5776 | 4.3999 | 4.1039 | 4.5754 | 4.5434 | 2.0406 | 2.7553 | 4.7378 | 1.7514 | 2.0031 | 3.9956 | 2.9569 | 4.4368 | 4.1720 | 3.5088 | 3.6817 | 5.2255 | 4.6888 |
| CUST_1030_Pi<br>416573500  | OR5AR1 | 2.1858 | 2.2292 | 2.4200 | 2.5564 | 3.5451 | 1.9232 | 2.4670 | 2.0005 | 1.8350 | 0.7432 | 2.1519 | 2.0025 | 1.8644 | 2.0983 | 2.1562 | 1.5909 | 1.8101 | 1.6366 | 1.9435 | 2.0456 | 3.1664 | 1.2697 | 3.2508 | 2.0282 |
| CUST_1062_Pi<br>416379584  | OR5AR1 | 1.8799 | 2.4059 | 1.6669 | 1.8439 | 1.1264 | 2.1219 | 1.9581 | 1.8033 | 1.5372 | 0.7432 | 1.6774 | 2.0418 | 1.7288 | 2.0324 | 1.7644 | 1.2834 | 1.0623 | 1.7754 | 1.8371 | 2.2794 | 1.6498 | 1.2538 | 1.2754 | 1.6749 |
| CUST_432_Pi4<br>16573500   | OR5AS1 | 1.8995 | 2.3065 | 1.7818 | 1.4028 | 0.9653 | 2.1164 | 1.9173 | 1.6734 | 1.7011 | 0.7432 | 1.7201 | 1.9861 | 1.8078 | 2.0593 | 1.8127 | 1.3822 | 1.0128 | 1.7577 | 1.8115 | 1.9989 | 1.6479 | 1.4332 | 1.3667 | 2.1557 |

|                           |        |        |        |        |        |        |        |        |        |        |        |        |        |        |        |        |        |        |        |        |        |        |        |        |        |
|---------------------------|--------|--------|--------|--------|--------|--------|--------|--------|--------|--------|--------|--------|--------|--------|--------|--------|--------|--------|--------|--------|--------|--------|--------|--------|--------|
| CUST_441_P14<br>16379584  | OR5AS1 | 1.9788 | 2.1851 | 1.5517 | 1.1084 | 1.0168 | 1.8073 | 2.2361 | 2.0051 | 1.4678 | 0.7432 | 1.9391 | 1.8357 | 1.7305 | 1.9103 | 1.6060 | 1.3566 | 1.0718 | 1.5607 | 1.7399 | 2.0338 | 1.3602 | 1.0642 | 1.1598 | 1.7667 |
| CUST_178_P14<br>16573500  | OR5AU1 | 1.6054 | 1.7938 | 2.1519 | 0.9894 | 0.7401 | 1.6517 | 1.6637 | 1.4073 | 1.4567 | 0.7432 | 1.1401 | 1.5750 | 1.5723 | 1.6669 | 1.6306 | 0.9889 | 0.7173 | 1.4540 | 1.5568 | 1.6258 | 1.4316 | 1.0171 | 1.7132 | 1.4458 |
| CUST_183_P14<br>16379584  | OR5AU1 | 2.1604 | 2.3902 | 3.0762 | 1.0702 | 1.7606 | 1.7089 | 2.4960 | 1.8185 | 3.5373 | 1.9563 | 2.5092 | 1.5630 | 1.7948 | 1.7257 | 2.5284 | 1.1964 | 0.8329 | 1.5578 | 1.9273 | 2.6375 | 2.5763 | 1.0529 | 1.1383 | 1.8139 |
| CUST_180_P14<br>16573500  | OR5B12 | 1.8243 | 1.9456 | 2.6038 | 1.1725 | 3.0627 | 1.9085 | 1.9551 | 1.5142 | 1.7126 | 1.1255 | 1.2788 | 1.7856 | 1.7618 | 1.8874 | 2.1621 | 1.0414 | 0.7608 | 1.7375 | 1.8924 | 1.7017 | 1.8036 | 1.2521 | 1.7222 | 1.6304 |
| CUST_185_P14<br>16379584  | OR5B12 | 2.1892 | 3.0394 | 1.9069 | 1.1780 | 0.7435 | 2.9239 | 1.8621 | 2.2542 | 1.5142 | 0.7432 | 1.4031 | 3.5054 | 1.7136 | 1.8407 | 1.4625 | 1.1350 | 0.7147 | 1.6946 | 1.6964 | 2.4203 | 1.8230 | 1.2661 | 2.1271 | 2.3211 |
| CUST_247_P14<br>16573500  | OR5B17 | 2.7116 | 2.5074 | 3.4871 | 4.2482 | 4.3770 | 1.9988 | 3.7534 | 4.9289 | 3.6690 | 5.3830 | 3.3397 | 1.8792 | 2.7063 | 3.4590 | 2.2953 | 3.1584 | 4.2787 | 1.9115 | 3.0401 | 1.9700 | 3.7733 | 3.5446 | 4.2071 | 2.9273 |
| CUST_255_P14<br>16379584  | OR5B17 | 1.9502 | 3.3496 | 1.5994 | 1.4690 | 1.0950 | 2.1418 | 2.0758 | 1.8331 | 1.4992 | 0.7432 | 1.6440 | 2.6389 | 1.7471 | 2.0160 | 1.7114 | 1.2649 | 0.9969 | 1.7516 | 1.8178 | 2.6632 | 2.0422 | 1.2312 | 1.2752 | 1.7597 |
| CUST_302_P14<br>16573500  | OR5B2  | 1.7880 | 2.1857 | 1.9179 | 1.2204 | 0.7851 | 1.9011 | 1.8581 | 1.5904 | 1.6708 | 0.7432 | 1.5428 | 1.8713 | 1.7362 | 1.8834 | 1.6349 | 1.2655 | 0.8830 | 1.6214 | 1.7469 | 1.8409 | 1.5779 | 1.4302 | 1.7829 | 1.5103 |
| CUST_310_P14<br>16379584  | OR5B2  | 2.1637 | 3.7098 | 1.9218 | 0.9541 | 0.8133 | 4.2577 | 2.2352 | 2.1317 | 1.7375 | 1.8882 | 1.5816 | 1.7170 | 1.7207 | 1.9069 | 1.5098 | 1.2538 | 3.1060 | 2.3695 | 1.9562 | 2.8929 | 2.0469 | 2.0178 | 1.4457 | 2.7664 |
| CUST_35_P141<br>6573500   | OR5B21 | 2.3625 | 2.0275 | 2.9242 | 1.2089 | 3.9182 | 3.5894 | 2.6866 | 1.5854 | 3.1568 | 1.6852 | 3.0795 | 1.6914 | 2.0161 | 1.9447 | 2.6357 | 2.5502 | 2.7986 | 1.6810 | 6.2049 | 1.8463 | 3.5863 | 1.2839 | 3.1064 | 1.9455 |
| CUST_37_P141<br>6379584   | OR5B21 | 1.8915 | 3.6426 | 1.6337 | 1.3336 | 0.9742 | 2.2556 | 2.0929 | 3.5198 | 1.6290 | 0.7432 | 1.4613 | 3.3303 | 1.6470 | 2.9507 | 1.7127 | 1.1999 | 0.7948 | 1.8762 | 1.8225 | 3.6138 | 2.3552 | 2.0561 | 1.5582 | 2.9144 |
| CUST_239_P14<br>16573500  | OR5B3  | 1.6945 | 2.0985 | 1.5697 | 1.2132 | 0.9741 | 1.9010 | 1.7610 | 1.7666 | 1.5214 | 0.7432 | 1.5263 | 1.8259 | 1.6171 | 1.9596 | 1.7012 | 1.2764 | 0.8927 | 1.6026 | 1.6244 | 1.9124 | 1.4344 | 1.2577 | 1.0647 | 1.4926 |
| CUST_246_P14<br>16379584  | OR5B3  | 2.1838 | 2.1339 | 1.7639 | 1.3320 | 1.2056 | 2.0524 | 2.4831 | 1.7764 | 1.7102 | 0.7432 | 1.6038 | 1.7833 | 1.8440 | 1.9765 | 1.5487 | 1.6004 | 1.0174 | 1.6031 | 2.0041 | 1.9547 | 2.2921 | 1.3097 | 1.1636 | 1.7514 |
| CUST_299_P14<br>16573500  | OR5C1  | 3.0980 | 1.8033 | 3.4275 | 1.6841 | 3.3177 | 1.8083 | 2.9837 | 2.9408 | 3.2631 | 2.6014 | 3.3672 | 2.1929 | 2.6243 | 1.7804 | 3.2237 | 1.1912 | 2.2625 | 1.7975 | 2.3472 | 1.8714 | 2.6285 | 2.7454 | 3.6398 | 1.9751 |
| CUST_307_P14<br>16379584  | OR5C1  | 3.3678 | 2.8094 | 3.7584 | 3.6887 | 4.9126 | 1.8902 | 3.5578 | 3.9315 | 3.9011 | 3.6834 | 3.9905 | 1.8830 | 2.6203 | 3.3817 | 3.5337 | 1.2481 | 3.8956 | 2.0497 | 3.1751 | 4.1057 | 3.6354 | 2.4605 | 4.8956 | 2.9199 |
| CUST_386_P14<br>16573500  | OR5D13 | 1.8003 | 2.0419 | 1.6396 | 1.2279 | 2.8711 | 1.9163 | 1.8998 | 1.5741 | 1.6614 | 0.7432 | 1.4631 | 1.7867 | 1.7347 | 1.8736 | 1.6040 | 1.2116 | 0.8299 | 1.5803 | 1.7071 | 1.7558 | 1.5750 | 1.2565 | 2.1139 | 1.5118 |
| CUST_395_P14<br>16379584  | OR5D13 | 1.7686 | 2.4762 | 1.6796 | 1.4624 | 1.0304 | 2.2051 | 1.7495 | 3.4257 | 1.5767 | 0.8404 | 1.6501 | 1.9844 | 2.1085 | 2.8479 | 1.5867 | 1.4090 | 0.9450 | 2.9917 | 1.7057 | 2.0063 | 1.8716 | 1.5151 | 1.2030 | 3.2919 |
| CUST_401_P14<br>16573500  | OR5D14 | 1.8531 | 1.9466 | 2.4433 | 1.2585 | 1.7830 | 2.0221 | 1.9622 | 1.4914 | 2.3634 | 0.7432 | 1.5362 | 1.8001 | 1.7812 | 1.9418 | 1.7381 | 1.0577 | 0.9688 | 1.8148 | 1.8753 | 1.7167 | 3.2349 | 1.4184 | 4.1767 | 1.6826 |
| CUST_410_P14<br>16379584  | OR5D14 | 1.7201 | 3.1065 | 1.5605 | 1.2060 | 0.8144 | 2.0176 | 1.8181 | 1.7480 | 1.5496 | 0.7432 | 1.5098 | 2.7273 | 1.6167 | 1.8765 | 1.5705 | 1.2208 | 0.7707 | 2.0163 | 1.6225 | 3.0388 | 1.7164 | 1.2544 | 1.0641 | 1.4370 |
| CUST_448_P14<br>16573500  | OR5D16 | 1.6866 | 1.9904 | 1.5630 | 1.2046 | 1.0243 | 1.9046 | 1.7173 | 1.5664 | 1.4715 | 0.7432 | 1.3651 | 1.7986 | 1.5968 | 1.8854 | 1.6266 | 1.2604 | 0.7792 | 1.5278 | 1.6386 | 1.8351 | 1.4510 | 1.2442 | 0.9672 | 1.4462 |
| CUST_457_P14<br>16379584  | OR5D16 | 2.0218 | 2.3902 | 1.5572 | 1.2088 | 0.8237 | 3.6548 | 2.0988 | 1.7437 | 1.5469 | 0.7432 | 1.5578 | 1.7902 | 1.7642 | 1.9207 | 2.6707 | 3.1490 | 0.7564 | 2.1406 | 1.7483 | 1.9308 | 2.1707 | 1.2632 | 1.5227 | 1.5042 |
| CUST_230_P14<br>16573500  | OR5D18 | 1.6927 | 1.8784 | 1.5317 | 1.1526 | 1.0799 | 1.7978 | 1.7308 | 1.4990 | 1.5422 | 0.7432 | 1.3245 | 1.6764 | 1.6519 | 1.8169 | 1.6372 | 1.1072 | 0.8410 | 1.5048 | 1.5958 | 1.6728 | 1.4615 | 1.1617 | 1.0413 | 1.4698 |
| CUST_237_P14<br>16379584  | OR5D18 | 2.5459 | 2.3704 | 1.9043 | 0.9665 | 0.8943 | 2.3638 | 3.0012 | 2.4898 | 2.3961 | 3.2641 | 1.9288 | 1.5936 | 3.8887 | 3.3449 | 2.5299 | 3.9955 | 0.9252 | 1.9023 | 2.6037 | 3.1895 | 2.4476 | 1.0600 | 1.1206 | 2.7380 |
| A_23_P127684              | OR5F1  | 3.3563 | 2.3177 | 4.2558 | 3.9073 | 4.9883 | 3.7342 | 3.8121 | 3.4364 | 3.9766 | 4.4377 | 3.4940 | 2.0027 | 2.7305 | 3.5931 | 4.1150 | 1.0396 | 3.5299 | 2.0302 | 4.0207 | 1.9183 | 3.8820 | 3.7064 | 4.5232 | 1.9791 |
| CUST_1793_P1<br>416261804 | OR5F1  | 1.8004 | 1.8847 | 2.1847 | 1.0550 | 1.8179 | 1.7057 | 2.0254 | 1.4918 | 1.9025 | 0.7432 | 1.8942 | 1.6279 | 1.7023 | 1.7413 | 2.4457 | 1.1921 | 0.7465 | 1.5216 | 1.6955 | 1.7271 | 1.6222 | 1.0915 | 1.6053 | 1.6432 |

|                            |        |        |        |        |        |        |        |        |        |        |        |        |        |        |        |        |        |        |        |        |        |        |        |        |        |
|----------------------------|--------|--------|--------|--------|--------|--------|--------|--------|--------|--------|--------|--------|--------|--------|--------|--------|--------|--------|--------|--------|--------|--------|--------|--------|--------|
| A_24_P366566               | OR5H1  | 3.8168 | 2.4501 | 5.3231 | 4.6802 | 6.1607 | 3.8347 | 3.7458 | 4.6252 | 5.4150 | 5.6017 | 4.5961 | 2.9851 | 2.9753 | 4.5186 | 5.3070 | 3.2124 | 3.9947 | 3.4379 | 4.6139 | 3.8339 | 4.8801 | 5.0892 | 6.0458 | 3.8820 |
| CUST_252_Pi4<br>16261804   | OR5H1  | 1.7304 | 2.1206 | 1.5405 | 1.1472 | 0.8762 | 1.8386 | 1.8731 | 1.8037 | 1.5846 | 0.7432 | 1.5554 | 1.8454 | 1.7027 | 1.9329 | 1.6712 | 1.2312 | 1.0539 | 1.6553 | 1.6445 | 1.9261 | 1.4314 | 1.1539 | 1.1108 | 1.5966 |
| CUST_357_Pi4<br>16573500   | OR5H14 | 2.0533 | 2.1400 | 1.4657 | 0.9956 | 0.8312 | 1.6753 | 2.3879 | 1.8339 | 1.5013 | 0.7432 | 1.5599 | 1.7641 | 1.8329 | 1.8223 | 1.5939 | 1.2314 | 1.0885 | 5.9889 | 1.8735 | 1.9478 | 1.4560 | 0.9607 | 1.7230 | 1.9603 |
| CUST_366_Pi4<br>16379584   | OR5H14 | 2.6203 | 2.1570 | 2.5136 | 2.4125 | 3.4358 | 2.9201 | 2.8373 | 1.6629 | 2.4584 | 2.6359 | 2.6431 | 2.8428 | 2.0859 | 2.2696 | 2.2977 | 2.9167 | 3.0467 | 1.8418 | 2.4976 | 1.9289 | 2.0727 | 3.2855 | 3.4469 | 3.2880 |
| CUST_42_Pi41<br>6573500    | OR5H15 | 1.6802 | 1.9986 | 1.5358 | 1.1926 | 0.9799 | 1.8954 | 1.7281 | 1.5738 | 1.4606 | 0.7432 | 1.3417 | 1.7437 | 1.5791 | 1.8488 | 1.6493 | 1.2523 | 0.7531 | 1.5129 | 1.6337 | 1.8362 | 1.4580 | 1.2345 | 0.9367 | 1.4525 |
| CUST_45_Pi41<br>6379584    | OR5H15 | 1.9597 | 2.2486 | 1.7468 | 1.5100 | 1.8347 | 2.3567 | 2.0635 | 1.8335 | 1.6396 | 0.8926 | 1.6169 | 1.9408 | 1.7503 | 2.1104 | 1.6816 | 1.6004 | 0.9498 | 1.7019 | 1.8294 | 2.0741 | 1.5761 | 1.6432 | 1.7818 | 1.5947 |
| CUST_410_Pi4<br>16573500   | OR5H2  | 1.8527 | 2.2242 | 1.6850 | 1.3301 | 1.5315 | 2.0498 | 1.9152 | 1.7431 | 1.6530 | 0.7432 | 2.6579 | 1.9093 | 1.7398 | 2.0138 | 1.8863 | 2.3921 | 1.0195 | 1.7685 | 1.7603 | 2.0666 | 1.5564 | 1.4338 | 1.7358 | 1.6430 |
| CUST_419_Pi4<br>16379584   | OR5H2  | 1.6188 | 2.3419 | 1.4233 | 1.0245 | 0.7963 | 1.8278 | 1.6524 | 2.9159 | 1.3898 | 1.9226 | 1.1167 | 1.5703 | 1.5068 | 3.3497 | 1.4912 | 1.0198 | 0.6745 | 1.5518 | 1.5718 | 1.6982 | 1.3589 | 1.1089 | 0.8552 | 1.6589 |
| CUST_186_Pi4<br>16573500   | OR5H6  | 1.7948 | 1.8984 | 3.2536 | 1.5882 | 1.9821 | 1.9198 | 1.9341 | 1.4510 | 2.1399 | 0.7432 | 1.1601 | 1.6808 | 1.6771 | 1.7759 | 2.1973 | 1.1024 | 2.3571 | 1.5821 | 1.7250 | 1.7167 | 1.9066 | 1.2540 | 2.7910 | 1.5183 |
| CUST_191_Pi4<br>16379584   | OR5H6  | 1.8550 | 2.4055 | 1.6926 | 1.3421 | 1.2793 | 2.2172 | 1.8928 | 1.8830 | 1.6139 | 0.9169 | 1.7752 | 2.0897 | 1.7193 | 2.1056 | 1.7982 | 1.3499 | 1.1023 | 1.8177 | 1.7582 | 2.2685 | 1.5640 | 1.4020 | 1.3606 | 1.6479 |
| A_23_P150467               | OR5I1  | 1.6804 | 1.9787 | 1.6393 | 1.8054 | 2.6620 | 1.8490 | 1.7602 | 1.5613 | 1.4393 | 0.8816 | 1.9399 | 1.7578 | 1.6012 | 1.8300 | 1.6334 | 1.2195 | 2.4810 | 1.4997 | 1.6363 | 1.8302 | 1.4354 | 1.1719 | 1.4959 | 1.4472 |
| CUST_11372_P<br>i416261804 | OR5I1  | 1.6620 | 5.4123 | 1.5016 | 1.0869 | 0.9202 | 1.8007 | 1.6745 | 6.9822 | 1.4665 | 0.7432 | 1.2915 | 1.7091 | 1.5998 | 5.5719 | 1.6314 | 1.0973 | 1.3355 | 1.5429 | 1.6218 | 5.8699 | 1.4253 | 1.1499 | 1.0091 | 1.4813 |
| CUST_15_Pi41<br>6573500    | OR5J2  | 2.0483 | 2.1639 | 1.7184 | 1.1108 | 0.9199 | 1.7855 | 2.3044 | 1.9103 | 1.4875 | 0.7432 | 1.6528 | 1.8472 | 1.8046 | 3.7474 | 1.6386 | 1.3222 | 1.1601 | 1.6453 | 1.8830 | 1.9904 | 2.2159 | 1.0816 | 1.1709 | 1.8267 |
| CUST_17_Pi41<br>6379584    | OR5J2  | 2.8289 | 3.6728 | 2.7838 | 0.9276 | 0.7840 | 3.7340 | 2.3036 | 3.5538 | 2.7651 | 2.3018 | 1.4541 | 1.9039 | 1.5932 | 3.7350 | 1.4181 | 1.7994 | 0.9445 | 3.2366 | 2.2833 | 3.7816 | 4.1680 | 2.2525 | 0.8822 | 4.2127 |
| CUST_533_Pi4<br>16573500   | OR5K1  | 2.0429 | 1.9911 | 2.5013 | 2.5523 | 1.7626 | 2.5709 | 2.2242 | 1.7406 | 1.5629 | 0.7432 | 1.2433 | 2.9414 | 2.2449 | 1.9722 | 1.7449 | 2.0615 | 0.7338 | 1.9765 | 2.3495 | 2.2643 | 2.4437 | 1.4765 | 1.3751 | 2.7564 |
| CUST_546_Pi4<br>16379584   | OR5K1  | 1.6717 | 2.0001 | 1.5091 | 1.1614 | 0.9316 | 1.9539 | 1.7050 | 1.5658 | 1.4522 | 0.7432 | 1.2795 | 1.7299 | 1.5341 | 1.8138 | 1.5541 | 1.1863 | 0.6745 | 1.4770 | 1.6146 | 1.8194 | 1.3871 | 1.2211 | 0.9371 | 1.4398 |
| CUST_283_Pi4<br>16573500   | OR5K2  | 1.7730 | 2.1349 | 1.9909 | 1.2054 | 1.0383 | 1.8482 | 1.8095 | 1.8577 | 1.6373 | 0.7432 | 1.6204 | 1.8230 | 1.6891 | 1.9288 | 1.7574 | 1.5204 | 1.0913 | 1.6392 | 1.6690 | 1.9968 | 1.4962 | 1.2329 | 1.2260 | 1.5386 |
| CUST_291_Pi4<br>16379584   | OR5K2  | 1.7775 | 2.0502 | 1.4763 | 1.3538 | 0.8742 | 2.3975 | 2.0120 | 1.8408 | 1.5138 | 0.7432 | 1.5331 | 1.6804 | 1.6436 | 1.7792 | 1.5154 | 1.2291 | 0.9504 | 1.4924 | 1.5901 | 1.8731 | 1.4444 | 0.9831 | 1.0385 | 1.5906 |
| CUST_32_Pi41<br>6573500    | OR5K3  | 1.7615 | 2.0992 | 1.7058 | 1.3231 | 0.9089 | 2.0156 | 1.8106 | 1.7464 | 1.6323 | 0.7432 | 1.5540 | 1.7787 | 1.6576 | 1.9739 | 1.6699 | 1.2513 | 0.8751 | 1.5664 | 1.6445 | 1.9013 | 1.4788 | 1.3333 | 1.2142 | 1.5032 |
| CUST_34_Pi41<br>6379584    | OR5K3  | 2.6859 | 3.1653 | 3.5375 | 3.4305 | 4.0682 | 3.0422 | 3.1178 | 3.8774 | 3.5853 | 3.0477 | 3.8896 | 1.5824 | 2.1973 | 3.4254 | 2.7843 | 2.4544 | 2.9861 | 2.6976 | 3.3597 | 2.9395 | 2.7811 | 3.2031 | 4.1135 | 3.5843 |
| CUST_41_Pi41<br>6573500    | OR5K4  | 1.6853 | 2.0741 | 1.5370 | 1.1812 | 0.9801 | 1.9882 | 1.7094 | 1.6363 | 1.4615 | 0.7432 | 2.3990 | 1.7858 | 1.5561 | 1.8875 | 1.5579 | 1.2193 | 0.6954 | 1.5083 | 1.6243 | 1.8933 | 1.3924 | 1.8420 | 1.0025 | 1.4425 |
| CUST_43_Pi41<br>6379584    | OR5K4  | 1.7351 | 3.1998 | 1.3807 | 0.8885 | 0.7137 | 1.4846 | 2.0421 | 2.6422 | 1.3622 | 0.7432 | 1.1342 | 1.4135 | 1.5575 | 1.4641 | 1.3075 | 0.9463 | 0.6745 | 1.7627 | 1.9003 | 1.5958 | 2.0514 | 0.7688 | 0.7907 | 1.5985 |
| CUST_403_Pi4<br>16573500   | OR5L1  | 2.6438 | 1.8691 | 2.7214 | 1.0139 | 3.0057 | 1.7119 | 3.0398 | 2.7433 | 2.7163 | 1.3461 | 1.2892 | 1.5273 | 2.0812 | 1.6660 | 2.1768 | 1.0558 | 2.3380 | 1.6628 | 2.3684 | 1.7143 | 3.1827 | 1.0860 | 2.2073 | 2.3609 |
| CUST_412_Pi4<br>16379584   | OR5L1  | 2.5648 | 3.7963 | 1.9142 | 1.6138 | 0.8928 | 3.5293 | 2.2630 | 2.0098 | 1.5264 | 0.9197 | 3.4004 | 3.8158 | 1.8399 | 2.0817 | 1.6108 | 1.3869 | 1.0464 | 2.3998 | 1.9726 | 3.1219 | 2.1953 | 1.3579 | 1.2998 | 3.5901 |
| A_24_P258235               | OR5L2  | 9.1148 | 8.2364 | 8.6448 | 6.8087 | 8.5240 | 8.9081 | 8.8247 | 7.9850 | 8.3494 | 6.5957 | 7.3278 | 8.7169 | 6.6631 | 8.8495 | 8.8615 | 6.2619 | 7.4311 | 8.4280 | 8.2242 | 7.5277 | 7.9545 | 6.7076 | 7.5277 | 7.5706 |

|                           |        |        |        |        |        |        |        |        |        |        |        |        |        |        |        |        |        |        |        |        |        |        |        |        |        |
|---------------------------|--------|--------|--------|--------|--------|--------|--------|--------|--------|--------|--------|--------|--------|--------|--------|--------|--------|--------|--------|--------|--------|--------|--------|--------|--------|
| CUST_839_Pi4<br>16261804  | OR5L2  | 1.7684 | 1.7169 | 2.3802 | 0.8550 | 1.1063 | 1.5518 | 2.0522 | 1.3443 | 2.2469 | 1.6749 | 1.1025 | 1.4692 | 1.7065 | 1.5708 | 1.7225 | 0.9240 | 1.1359 | 1.4859 | 1.6379 | 1.5131 | 3.0819 | 0.9246 | 1.4366 | 1.5988 |
| CUST_285_Pi4<br>16573500  | OR5M1  | 1.9991 | 2.3521 | 1.9995 | 3.0886 | 1.5673 | 1.9895 | 2.1578 | 1.8185 | 2.6578 | 3.6974 | 4.0183 | 2.0393 | 1.7990 | 1.9982 | 2.1132 | 2.8083 | 1.2591 | 1.7389 | 1.8719 | 2.2253 | 1.5946 | 1.2358 | 2.0351 | 1.8012 |
| CUST_293_Pi4<br>16379584  | OR5M1  | 1.6646 | 2.2428 | 1.4907 | 1.1159 | 0.9149 | 2.3704 | 1.7093 | 1.5628 | 1.4311 | 0.7432 | 1.2702 | 1.7034 | 1.5431 | 2.1383 | 1.5347 | 1.1591 | 0.6745 | 1.7437 | 1.6079 | 1.8344 | 1.3678 | 1.1694 | 0.9350 | 1.8593 |
| CUST_405_Pi4<br>16573500  | OR5M10 | 1.8240 | 2.1771 | 2.3587 | 1.2053 | 2.6135 | 1.9132 | 1.9826 | 2.0479 | 2.8030 | 1.8348 | 1.5317 | 1.9213 | 1.7761 | 2.0018 | 1.7891 | 1.2399 | 1.5413 | 1.7770 | 1.7115 | 1.9598 | 2.1530 | 1.2361 | 3.4009 | 1.6904 |
| CUST_414_Pi4<br>16379584  | OR5M10 | 1.9680 | 3.4197 | 1.6509 | 1.3146 | 0.9347 | 2.1168 | 2.0398 | 1.7945 | 1.8040 | 0.7432 | 1.6646 | 1.8665 | 1.7474 | 1.9765 | 1.6336 | 1.3140 | 0.8227 | 1.8965 | 1.8079 | 2.4958 | 1.5532 | 1.3621 | 1.2649 | 1.6535 |
| CUST_256_Pi4<br>16573500  | OR5M11 | 2.0345 | 2.1938 | 1.6908 | 1.2951 | 2.1105 | 2.4504 | 2.1864 | 1.6546 | 1.6646 | 0.7432 | 1.6733 | 1.8530 | 1.8289 | 1.9622 | 1.9910 | 1.3480 | 1.0271 | 1.6506 | 1.9200 | 1.9891 | 2.2359 | 1.2844 | 1.3174 | 1.7020 |
| CUST_264_Pi4<br>16379584  | OR5M11 | 1.6053 | 1.7489 | 1.3838 | 0.8689 | 0.7110 | 1.5183 | 1.8461 | 1.4442 | 2.7281 | 0.7432 | 1.1299 | 1.4502 | 1.5932 | 1.5518 | 1.4707 | 0.9692 | 0.7090 | 1.4121 | 1.5338 | 1.5634 | 1.9463 | 0.8404 | 0.8542 | 1.6042 |
| CUST_287_Pi4<br>16573500  | OR5M3  | 1.8235 | 2.3251 | 1.7001 | 1.3676 | 1.1369 | 2.0891 | 1.8712 | 1.8577 | 1.6590 | 0.7688 | 1.7476 | 1.9562 | 1.7060 | 2.0653 | 1.7629 | 1.3232 | 1.0658 | 1.7343 | 1.7218 | 2.1549 | 1.5388 | 1.4339 | 1.3244 | 1.6067 |
| CUST_295_Pi4<br>16379584  | OR5M3  | 2.0026 | 3.5346 | 2.7117 | 1.1148 | 0.8896 | 2.3764 | 2.9075 | 2.0515 | 1.6754 | 2.7140 | 1.6935 | 2.8081 | 1.9313 | 2.6548 | 1.5601 | 1.4389 | 1.5117 | 1.8871 | 1.7875 | 3.7136 | 2.9779 | 1.0146 | 1.1286 | 3.7289 |
| CUST_306_Pi4<br>16573500  | OR5M8  | 1.6442 | 1.8028 | 1.4937 | 1.0425 | 1.3807 | 1.6901 | 1.7097 | 1.4486 | 1.8777 | 0.7432 | 1.7968 | 1.5838 | 1.6092 | 1.7178 | 1.6188 | 1.0255 | 0.7495 | 1.4591 | 1.5764 | 1.6250 | 2.6383 | 1.0559 | 1.6650 | 1.4469 |
| CUST_314_Pi4<br>16379584  | OR5M8  | 1.9347 | 2.0367 | 1.9146 | 1.0735 | 0.8936 | 1.7959 | 2.0283 | 1.5953 | 1.4042 | 0.7432 | 1.2885 | 1.6304 | 1.6255 | 1.7461 | 1.5625 | 1.1912 | 0.6916 | 1.5873 | 1.6885 | 1.8339 | 1.5912 | 1.0793 | 0.9289 | 1.6503 |
| CUST_407_Pi4<br>16573500  | OR5M9  | 2.0632 | 2.0790 | 2.9876 | 1.4192 | 3.3003 | 2.1132 | 2.2264 | 2.2671 | 3.1640 | 2.0856 | 2.8084 | 1.9097 | 1.8349 | 2.0576 | 2.3703 | 2.0614 | 2.7411 | 1.7576 | 1.9805 | 1.8701 | 2.0539 | 1.5318 | 4.1149 | 1.6527 |
| CUST_416_Pi4<br>16379584  | OR5M9  | 1.9669 | 2.7440 | 2.8078 | 2.1244 | 0.9660 | 3.5306 | 2.7873 | 4.0149 | 1.4573 | 2.1907 | 2.1817 | 1.8841 | 1.7173 | 3.5669 | 1.5639 | 1.3034 | 1.0265 | 2.9509 | 1.8261 | 4.2836 | 2.3966 | 2.6210 | 1.1290 | 2.2924 |
| A_23_P47125               | OR5P2  | 1.6288 | 1.9350 | 1.5074 | 1.0589 | 2.4673 | 1.6946 | 1.6808 | 1.5309 | 1.5435 | 0.7432 | 1.3670 | 1.6789 | 1.5952 | 1.7576 | 1.6933 | 1.1289 | 1.8367 | 1.4911 | 1.5847 | 1.8067 | 1.4320 | 1.0658 | 0.9853 | 1.4528 |
| CUST_1455_Pi<br>416261804 | OR5P2  | 1.8216 | 2.0134 | 2.5447 | 2.0509 | 2.5741 | 2.1045 | 1.8815 | 1.5299 | 2.5616 | 0.7432 | 1.2299 | 1.8182 | 1.6966 | 1.9244 | 2.0446 | 2.8601 | 1.0060 | 1.8860 | 1.7441 | 1.8342 | 1.8016 | 1.3722 | 1.9346 | 1.5815 |
| A_23_P399217              | OR5P3  | 2.2294 | 3.7963 | 1.7570 | 1.3874 | 1.1094 | 3.7548 | 1.8348 | 1.8314 | 1.6466 | 0.9024 | 1.6454 | 1.9298 | 1.6758 | 2.0769 | 1.7274 | 2.5950 | 0.9366 | 1.8449 | 1.7260 | 2.1197 | 1.5203 | 1.5582 | 1.3213 | 1.6266 |
| CUST_2063_Pi<br>416261804 | OR5P3  | 1.8348 | 2.1316 | 1.6313 | 1.4079 | 1.0993 | 2.1894 | 1.9125 | 1.7071 | 1.5625 | 0.7432 | 1.4968 | 1.8513 | 1.6935 | 2.0149 | 1.5564 | 1.4207 | 0.7770 | 1.6238 | 1.7578 | 1.9140 | 1.5041 | 1.4803 | 1.1212 | 1.4765 |
| CUST_184_Pi4<br>16573500  | OR5R1  | 1.7474 | 2.7862 | 1.5061 | 1.0861 | 0.9829 | 1.7472 | 1.9570 | 1.6790 | 1.4977 | 0.7432 | 1.4596 | 1.8026 | 1.7332 | 1.8607 | 1.6687 | 1.1744 | 1.0171 | 1.6048 | 1.6552 | 1.8637 | 1.8357 | 1.0581 | 1.3751 | 1.6192 |
| CUST_189_Pi4<br>16379584  | OR5R1  | 2.8720 | 2.0899 | 1.6316 | 2.0286 | 0.8776 | 1.6334 | 3.1576 | 3.2261 | 1.9281 | 0.7432 | 1.3124 | 2.5617 | 1.8119 | 1.6752 | 1.2790 | 2.9118 | 1.0435 | 1.5580 | 2.1413 | 3.3556 | 2.0326 | 0.9199 | 0.9624 | 3.9349 |
| CUST_409_Pi4<br>16573500  | OR5T1  | 1.8110 | 2.2756 | 1.6756 | 1.3505 | 1.0635 | 2.0873 | 1.8627 | 1.8535 | 1.6462 | 0.7550 | 1.6867 | 1.8770 | 1.6816 | 2.0353 | 1.7173 | 1.2919 | 0.9825 | 1.6704 | 1.6963 | 2.0945 | 1.5051 | 1.4095 | 1.2887 | 1.5604 |
| CUST_418_Pi4<br>16379584  | OR5T1  | 1.7376 | 2.3788 | 1.6068 | 1.1680 | 1.0034 | 1.9029 | 1.8393 | 2.9775 | 1.5419 | 0.7432 | 1.5776 | 1.7598 | 1.6255 | 1.9129 | 1.6441 | 1.2316 | 0.9228 | 1.5461 | 1.6412 | 2.0826 | 1.4161 | 1.2136 | 1.1497 | 1.7046 |
| A_23_P87104               | OR5T2  | 2.1736 | 2.1820 | 2.4786 | 1.2322 | 1.1638 | 1.9883 | 2.4319 | 2.1676 | 2.1868 | 0.7432 | 2.3576 | 1.9320 | 2.3153 | 1.9752 | 1.7787 | 2.6144 | 1.9326 | 2.2724 | 2.0327 | 2.0817 | 1.5900 | 1.2807 | 1.8953 | 1.9826 |
| CUST_1226_Pi<br>416261804 | OR5T2  | 2.2481 | 2.2085 | 2.0208 | 1.3546 | 3.7816 | 2.0968 | 2.2251 | 3.3062 | 2.6375 | 3.4009 | 1.3957 | 1.8964 | 2.8664 | 1.9956 | 1.6934 | 1.1943 | 0.6933 | 1.7373 | 2.1401 | 1.8716 | 2.2498 | 1.3999 | 3.0821 | 1.5441 |
| CUST_337_Pi4<br>16573500  | OR5T3  | 1.8084 | 2.1910 | 2.9140 | 2.9035 | 3.8878 | 2.8448 | 1.9306 | 2.4128 | 2.4535 | 1.4728 | 3.1728 | 1.9104 | 1.6805 | 1.9935 | 2.8820 | 1.1427 | 2.1359 | 1.6971 | 1.6954 | 2.6603 | 2.4101 | 1.3114 | 2.2107 | 1.5520 |

|                           |       |        |        |        |        |        |        |        |        |        |        |        |        |        |        |        |        |        |        |        |        |        |        |        |        |
|---------------------------|-------|--------|--------|--------|--------|--------|--------|--------|--------|--------|--------|--------|--------|--------|--------|--------|--------|--------|--------|--------|--------|--------|--------|--------|--------|
| CUST_346_Pi4<br>16379584  | OR5T3 | 1.7075 | 1.9420 | 1.5218 | 0.9196 | 0.7661 | 1.6249 | 1.9493 | 1.5711 | 1.6392 | 0.7432 | 1.2535 | 1.5720 | 1.7567 | 1.6446 | 1.4756 | 1.0389 | 0.7152 | 1.4142 | 1.7209 | 1.7264 | 2.2702 | 1.3033 | 0.9204 | 1.5069 |
| A_23_P42241               | OR5V1 | 4.0242 | 4.7718 | 5.5486 | 5.1647 | 5.9859 | 2.5841 | 4.4313 | 4.0869 | 5.1961 | 5.6733 | 4.7423 | 5.0314 | 2.9392 | 4.5009 | 5.6086 | 3.0406 | 5.0774 | 4.2917 | 4.6723 | 4.4871 | 4.9047 | 5.8196 | 6.1169 | 3.2531 |
| CUST_4707_Pi<br>416261804 | OR5V1 | 1.6847 | 2.1023 | 1.7619 | 1.1668 | 1.0384 | 1.9406 | 1.7112 | 1.6717 | 1.4604 | 0.7432 | 1.4285 | 1.8295 | 1.5907 | 1.9333 | 1.5990 | 1.2355 | 0.7972 | 1.5564 | 1.6298 | 1.9523 | 1.4130 | 1.2227 | 1.0837 | 1.4632 |
| CUST_163_Pi4<br>16573500  | OR5W2 | 1.7540 | 1.7059 | 2.9985 | 0.8660 | 1.5866 | 1.4961 | 2.0675 | 1.4170 | 3.4615 | 0.7432 | 2.6964 | 1.4653 | 1.6982 | 1.5606 | 3.4578 | 0.9773 | 1.0346 | 1.4451 | 1.7004 | 1.5216 | 2.9203 | 0.8293 | 2.1717 | 2.0201 |
| CUST_168_Pi4<br>16379584  | OR5W2 | 1.8202 | 2.2634 | 1.9568 | 1.5665 | 1.1497 | 2.6882 | 1.8718 | 2.4382 | 2.2817 | 1.2592 | 1.6749 | 1.9347 | 1.6975 | 2.0195 | 1.9271 | 3.4829 | 1.0234 | 1.7531 | 1.9119 | 2.1018 | 1.5001 | 1.4055 | 1.5793 | 1.6027 |
| A_23_P64448               | OR6A2 | 1.6905 | 1.8893 | 1.5310 | 1.1327 | 0.7547 | 1.7689 | 1.7531 | 1.5058 | 1.5433 | 0.7432 | 1.3073 | 1.6590 | 2.0077 | 1.8102 | 1.6684 | 1.0992 | 0.8297 | 1.5029 | 1.5975 | 1.7113 | 3.3687 | 1.1433 | 1.6694 | 1.4757 |
| CUST_1951_Pi<br>416261804 | OR6A2 | 2.0585 | 1.9264 | 2.3050 | 1.1196 | 1.0028 | 1.7702 | 2.3379 | 1.5428 | 2.0257 | 0.7432 | 2.4572 | 1.7050 | 1.8148 | 1.8327 | 1.4976 | 1.2897 | 0.9802 | 1.5694 | 1.9179 | 1.7499 | 2.6805 | 1.1483 | 2.3352 | 1.6863 |
| CUST_599_Pi4<br>16573500  | OR6B1 | 1.6668 | 1.8375 | 1.8846 | 1.0718 | 0.8656 | 1.7484 | 1.7389 | 1.4662 | 1.4821 | 0.7432 | 1.2421 | 1.6632 | 1.6575 | 1.7686 | 1.6094 | 1.0216 | 1.0990 | 1.5328 | 1.5920 | 1.6131 | 1.4450 | 1.0993 | 1.0639 | 1.4819 |
| CUST_615_Pi4<br>16379584  | OR6B1 | 2.1188 | 2.1443 | 1.7743 | 1.1117 | 0.8770 | 1.8438 | 2.3868 | 1.9350 | 1.5467 | 0.7432 | 1.6434 | 1.9017 | 1.9087 | 1.9735 | 1.5716 | 1.3851 | 2.4176 | 1.6709 | 2.6874 | 1.9845 | 2.0249 | 1.1323 | 1.1957 | 2.0501 |
| CUST_368_Pi4<br>16379584  | OR6B2 | 2.2125 | 2.0923 | 1.9139 | 1.7793 | 2.8060 | 3.0193 | 2.6869 | 2.7725 | 1.4815 | 0.8652 | 2.2818 | 1.7511 | 5.0066 | 1.9368 | 1.8581 | 1.3135 | 0.8738 | 2.3189 | 2.1772 | 1.8713 | 1.8492 | 2.1107 | 2.0872 | 1.9978 |
| CUST_359_Pi4<br>16573500  | OR6B3 | 2.3877 | 1.6485 | 3.4236 | 1.0543 | 2.9535 | 1.7814 | 2.8114 | 1.1723 | 3.4481 | 0.7432 | 2.2880 | 1.6371 | 2.2331 | 1.6848 | 2.5259 | 1.4444 | 2.9572 | 1.8288 | 2.3021 | 1.5224 | 2.6884 | 1.2029 | 4.7675 | 2.1973 |
| CUST_562_Pi4<br>16573500  | OR6B3 | 2.0526 | 2.1111 | 1.9063 | 1.1711 | 0.7972 | 1.8803 | 2.3329 | 1.6559 | 1.9348 | 0.7432 | 1.4368 | 1.8716 | 1.9296 | 1.9495 | 1.8194 | 1.1624 | 1.0327 | 1.8199 | 1.9236 | 1.8740 | 1.6084 | 1.2054 | 1.2291 | 1.9306 |
| CUST_578_Pi4<br>16379584  | OR6B3 | 2.2169 | 2.1900 | 1.8538 | 2.3557 | 1.6448 | 2.0293 | 3.0444 | 1.7361 | 1.9029 | 0.7432 | 1.5905 | 1.9466 | 2.9968 | 2.0639 | 2.5594 | 2.8962 | 2.2124 | 2.2391 | 2.1694 | 2.7597 | 1.7763 | 1.3784 | 1.6207 | 2.3732 |
| CUST_177_Pi4<br>16573500  | OR6C1 | 1.7970 | 2.0236 | 1.6226 | 1.2500 | 1.5074 | 1.9768 | 1.8959 | 1.6596 | 1.5645 | 0.7432 | 1.4654 | 1.7526 | 1.6834 | 1.8900 | 1.6060 | 1.1965 | 0.7810 | 1.5406 | 1.6741 | 1.7758 | 1.4774 | 1.2842 | 1.9548 | 1.4980 |
| CUST_182_Pi4<br>16379584  | OR6C1 | 1.6604 | 2.0151 | 1.4343 | 0.9721 | 0.7541 | 1.6559 | 1.9145 | 1.6372 | 1.5113 | 0.7432 | 1.3268 | 1.6280 | 1.6209 | 1.7160 | 1.5302 | 1.0841 | 0.7970 | 1.4363 | 1.6999 | 1.7140 | 1.3629 | 0.9511 | 0.9566 | 1.5022 |
| A_23_P368909              | OR6C2 | 2.5478 | 2.1839 | 2.8421 | 1.2443 | 3.5634 | 2.1292 | 2.8095 | 1.5355 | 3.1401 | 0.7432 | 1.8011 | 2.0075 | 2.1386 | 1.9602 | 2.0016 | 1.1558 | 0.9341 | 2.3027 | 2.9734 | 2.1056 | 2.0437 | 1.3510 | 3.3348 | 2.3013 |
| CUST_3783_Pi<br>416261804 | OR6C2 | 1.8689 | 1.8104 | 1.9067 | 0.8823 | 0.8752 | 1.5015 | 2.2214 | 1.4679 | 1.4431 | 0.7432 | 1.7334 | 1.5373 | 1.6977 | 1.5820 | 1.4807 | 1.1506 | 0.8459 | 1.4338 | 1.7454 | 1.6905 | 2.5870 | 0.7688 | 0.8796 | 2.1816 |
| CUST_3813_Pi<br>416261804 | OR6C2 | 2.3747 | 2.5337 | 2.2045 | 0.9451 | 0.9369 | 1.5381 | 2.8641 | 1.4792 | 2.1332 | 2.4293 | 2.8251 | 2.8135 | 1.9550 | 1.6932 | 1.5164 | 1.3244 | 1.1412 | 2.0694 | 2.2089 | 1.7193 | 2.9554 | 0.8909 | 1.1584 | 2.0803 |
| CUST_182_Pi4<br>16573500  | OR6C3 | 1.6668 | 1.9325 | 2.2662 | 1.3075 | 2.6234 | 1.8056 | 1.8788 | 1.4850 | 2.3424 | 0.7432 | 1.3468 | 1.7613 | 1.6056 | 1.8155 | 2.0857 | 1.1506 | 2.2703 | 1.5938 | 1.6203 | 1.7848 | 1.4678 | 1.1597 | 2.7446 | 1.4729 |
| CUST_187_Pi4<br>16379584  | OR6C3 | 1.8522 | 2.4423 | 1.6692 | 1.3357 | 1.2623 | 2.2126 | 1.8975 | 1.8900 | 1.5890 | 0.8991 | 1.7596 | 2.0432 | 1.7561 | 2.0952 | 1.7612 | 1.3388 | 1.0798 | 2.0529 | 1.7462 | 2.2496 | 1.5196 | 1.4050 | 3.7419 | 1.6346 |
| CUST_422_Pi4<br>16573500  | OR6C4 | 1.7155 | 2.0796 | 1.6731 | 1.3286 | 1.1866 | 1.9520 | 1.7382 | 1.6409 | 1.5998 | 0.7432 | 1.5005 | 1.9063 | 1.6609 | 2.0118 | 1.7457 | 1.3977 | 0.9166 | 1.5984 | 1.6737 | 1.9180 | 1.5358 | 1.3080 | 1.0178 | 1.4591 |
| CUST_431_Pi4<br>16379584  | OR6C4 | 2.0871 | 2.3005 | 1.9631 | 1.5111 | 1.0078 | 2.3452 | 1.9049 | 1.8416 | 1.7059 | 0.8735 | 1.6663 | 1.9258 | 1.7185 | 2.1129 | 1.7273 | 1.8558 | 0.8571 | 1.7110 | 2.1813 | 2.0230 | 1.5634 | 1.6447 | 1.3513 | 1.5635 |
| CUST_29_Pi41<br>6573500   | OR6C6 | 1.7341 | 2.1691 | 1.6163 | 1.2651 | 0.9320 | 1.9902 | 1.7620 | 1.8102 | 1.5571 | 0.7432 | 1.5662 | 1.9390 | 1.6963 | 2.0318 | 1.7494 | 1.2426 | 1.0346 | 1.7532 | 1.6669 | 1.9572 | 3.1062 | 1.3003 | 1.1682 | 1.5797 |

|                           |        |        |        |        |        |        |        |        |        |        |        |        |        |        |        |        |        |        |        |        |        |        |        |        |        |
|---------------------------|--------|--------|--------|--------|--------|--------|--------|--------|--------|--------|--------|--------|--------|--------|--------|--------|--------|--------|--------|--------|--------|--------|--------|--------|--------|
| CUST_31_Pi41<br>6379584   | OR6C6  | 1.7484 | 1.9350 | 1.4491 | 0.9945 | 0.8593 | 1.7252 | 1.9071 | 1.5422 | 1.3750 | 0.7432 | 1.2203 | 1.5538 | 1.5766 | 1.6456 | 1.4697 | 1.1452 | 0.6745 | 1.4316 | 1.6675 | 1.7530 | 1.3461 | 1.0030 | 0.8686 | 1.4468 |
| CUST_45_Pi41<br>6573500   | OR6C65 | 5.6052 | 6.7829 | 5.2065 | 6.6102 | 6.0554 | 6.1657 | 6.9248 | 6.2612 | 4.9687 | 6.3194 | 5.0358 | 4.3354 | 4.4034 | 6.9070 | 4.7242 | 5.1250 | 5.3944 | 4.4774 | 5.2606 | 6.4460 | 5.0969 | 6.3125 | 5.7442 | 4.9153 |
| CUST_48_Pi41<br>6379584   | OR6C65 | 2.1017 | 1.9117 | 1.4491 | 1.0659 | 0.7299 | 2.0503 | 1.8930 | 1.5788 | 1.5693 | 1.1574 | 1.2555 | 1.6079 | 1.6135 | 1.8052 | 1.5188 | 1.0388 | 0.7010 | 1.4473 | 1.8856 | 1.6641 | 1.3902 | 1.0756 | 1.2760 | 3.2175 |
| CUST_34_Pi41<br>6573500   | OR6C68 | 1.5900 | 1.8635 | 1.4177 | 0.9497 | 0.7656 | 1.6732 | 1.7211 | 1.5481 | 1.4104 | 0.7432 | 1.2008 | 1.5605 | 1.5342 | 1.6676 | 1.5399 | 1.0156 | 0.6808 | 1.4271 | 1.5292 | 1.6608 | 1.3398 | 1.9633 | 0.8755 | 1.4221 |
| CUST_36_Pi41<br>6379584   | OR6C68 | 1.8930 | 2.2932 | 1.4408 | 0.9423 | 0.7712 | 1.6246 | 2.2334 | 1.7397 | 1.3909 | 0.7432 | 1.3995 | 1.6025 | 1.6895 | 1.6559 | 1.4634 | 1.0936 | 0.8262 | 1.4591 | 1.7316 | 2.7647 | 1.3831 | 0.8826 | 0.9812 | 2.0190 |
| CUST_44_Pi41<br>6573500   | OR6C70 | 1.7998 | 2.2756 | 1.6700 | 1.2928 | 1.2664 | 2.0896 | 1.8547 | 1.8372 | 1.6017 | 0.8936 | 1.7188 | 1.9897 | 1.7020 | 2.0550 | 1.7673 | 1.3236 | 1.0866 | 1.7641 | 1.7252 | 2.1658 | 1.4849 | 1.3429 | 1.3487 | 1.6195 |
| CUST_47_Pi41<br>6379584   | OR6C70 | 1.8182 | 2.2329 | 1.6652 | 1.5663 | 1.1591 | 2.1626 | 1.9131 | 1.8463 | 1.5763 | 0.7432 | 1.6071 | 1.8785 | 1.6670 | 2.0739 | 1.6193 | 1.5012 | 0.9268 | 1.8068 | 1.7079 | 2.8134 | 1.4879 | 1.4505 | 1.1477 | 1.5203 |
| CUST_1120_Pi<br>416573500 | OR6C74 | 2.6016 | 4.2961 | 3.4867 | 6.5980 | 4.0847 | 1.9408 | 3.1247 | 4.1922 | 2.8577 | 4.4499 | 2.6359 | 3.3206 | 1.5645 | 4.6337 | 3.2542 | 3.0321 | 1.5260 | 1.4363 | 1.7891 | 4.3624 | 2.7151 | 2.9352 | 3.4116 | 2.9384 |
| CUST_1157_Pi<br>416379584 | OR6C74 | 4.5110 | 2.9324 | 3.8107 | 4.0162 | 4.4634 | 2.3931 | 4.6750 | 3.8573 | 3.7993 | 4.7456 | 3.8155 | 1.8336 | 2.4610 | 3.0259 | 3.8361 | 2.7816 | 3.2353 | 2.4360 | 4.1641 | 3.0023 | 3.5312 | 4.7015 | 4.8353 | 3.0565 |
| CUST_31_Pi41<br>6573500   | OR6C75 | 1.7514 | 2.0333 | 1.6322 | 1.2440 | 1.3234 | 1.8828 | 1.8365 | 1.5978 | 1.6249 | 0.7432 | 1.5323 | 1.7856 | 1.7025 | 1.9048 | 1.6622 | 1.2596 | 0.9439 | 1.5470 | 1.6520 | 1.7903 | 1.4993 | 1.2357 | 1.6135 | 1.4735 |
| CUST_33_Pi41<br>6379584   | OR6C75 | 2.4241 | 2.4934 | 1.7055 | 1.9479 | 2.5412 | 2.4780 | 2.7227 | 2.0281 | 1.8064 | 2.1912 | 1.6294 | 2.5221 | 2.5283 | 1.9716 | 1.5516 | 2.3512 | 0.9447 | 2.0402 | 2.2163 | 2.4247 | 1.5432 | 1.1482 | 1.2675 | 2.9709 |
| CUST_36_Pi41<br>6573500   | OR6C76 | 4.3297 | 6.0286 | 4.2438 | 6.2422 | 5.3654 | 5.2924 | 5.4673 | 6.0108 | 3.5397 | 5.8221 | 4.3027 | 4.9281 | 3.1608 | 6.6015 | 4.0077 | 5.4203 | 4.9562 | 3.1926 | 3.4029 | 6.5106 | 3.8052 | 5.5801 | 4.8849 | 3.9476 |
| CUST_38_Pi41<br>6379584   | OR6C76 | 1.5271 | 2.1482 | 1.7469 | 2.3711 | 0.9479 | 1.8560 | 1.8021 | 2.3720 | 1.4771 | 2.9380 | 2.9817 | 1.5638 | 2.1003 | 1.7502 | 1.4169 | 2.0865 | 2.5992 | 2.8277 | 1.6746 | 3.4803 | 2.8864 | 1.9282 | 1.8527 | 3.2874 |
| CUST_268_Pi4<br>16573500  | OR6F1  | 1.8861 | 2.2848 | 2.0607 | 1.3532 | 2.1508 | 2.0888 | 2.5681 | 1.7631 | 2.1742 | 0.7688 | 1.7754 | 2.0810 | 1.7946 | 2.0711 | 2.3233 | 1.3452 | 1.2192 | 1.8800 | 1.8138 | 2.1771 | 1.7388 | 1.4194 | 1.4245 | 1.6954 |
| CUST_276_Pi4<br>16379584  | OR6F1  | 2.3601 | 1.9656 | 2.0441 | 1.0564 | 0.7535 | 1.9073 | 2.1533 | 2.1487 | 1.4977 | 1.1029 | 1.4425 | 1.6091 | 1.6815 | 1.7378 | 1.4945 | 1.1901 | 0.8542 | 1.5462 | 1.7019 | 1.7242 | 1.3790 | 0.9911 | 1.0196 | 1.5567 |
| A_23_P51761               | OR6K2  | 3.7521 | 3.1015 | 4.4219 | 2.7968 | 5.4756 | 1.9316 | 3.6195 | 3.4613 | 4.2688 | 4.9818 | 3.7786 | 1.7422 | 2.9449 | 3.5418 | 2.9577 | 3.6685 | 4.9755 | 1.9714 | 3.6693 | 1.9819 | 3.3420 | 2.7418 | 5.0741 | 2.6562 |
| CUST_2234_Pi<br>416261804 | OR6K2  | 3.1895 | 2.4660 | 4.0393 | 3.2523 | 5.1037 | 2.1618 | 3.5890 | 4.2191 | 4.1046 | 3.4721 | 4.2434 | 2.0070 | 1.9351 | 2.9123 | 3.7928 | 3.1352 | 2.4408 | 2.1158 | 3.2578 | 3.2641 | 3.8006 | 1.6401 | 4.4396 | 2.0460 |
| CUST_382_Pi4<br>16573500  | OR6K3  | 1.7057 | 1.8606 | 1.4386 | 1.0211 | 1.1877 | 1.9708 | 1.9121 | 1.4976 | 1.8007 | 0.7432 | 1.2566 | 1.6258 | 1.7176 | 6.3446 | 1.6068 | 1.0892 | 0.8358 | 1.5439 | 1.6130 | 1.6661 | 1.9630 | 1.0566 | 1.6541 | 1.5361 |
| CUST_391_Pi4<br>16379584  | OR6K3  | 1.6050 | 1.8930 | 1.4307 | 1.0487 | 0.7390 | 1.7961 | 1.6274 | 1.5483 | 1.4395 | 0.7432 | 1.1740 | 1.5928 | 1.5060 | 1.7247 | 1.5528 | 0.9811 | 0.6745 | 1.5503 | 1.5421 | 1.9367 | 1.8730 | 1.7426 | 0.8915 | 1.4321 |
| CUST_397_Pi4<br>16573500  | OR6K6  | 1.8829 | 2.6993 | 1.4570 | 3.4585 | 3.3242 | 2.5627 | 1.9519 | 1.8961 | 1.5889 | 3.7668 | 0.9913 | 3.1280 | 1.7220 | 2.1492 | 2.6872 | 0.7432 | 1.5108 | 1.6007 | 1.7962 | 2.0576 | 2.1027 | 4.3869 | 2.4827 | 2.3501 |
| CUST_406_Pi4<br>16379584  | OR6K6  | 2.0555 | 2.7908 | 2.4169 | 0.9626 | 1.4235 | 1.6691 | 2.4253 | 2.1444 | 2.5096 | 1.8339 | 2.1120 | 1.7797 | 1.8397 | 4.0265 | 1.6235 | 2.7888 | 1.2852 | 1.6083 | 1.8884 | 2.9314 | 3.3756 | 2.1925 | 1.3008 | 2.0131 |
| A_23_P150428              | OR6M1  | 5.5169 | 4.0185 | 5.2129 | 4.2519 | 5.6946 | 3.7111 | 4.8320 | 5.0380 | 5.0815 | 5.0676 | 4.7515 | 3.0620 | 4.3412 | 5.2312 | 5.3601 | 4.1980 | 4.6456 | 3.6949 | 4.5429 | 2.8513 | 4.5163 | 4.0523 | 5.0540 | 4.1608 |
| CUST_2003_Pi<br>416261804 | OR6M1  | 2.0694 | 2.1971 | 2.3805 | 1.0728 | 2.8376 | 1.7683 | 2.3490 | 1.8760 | 1.7792 | 0.7432 | 2.8013 | 1.8489 | 1.8858 | 1.9147 | 2.4034 | 1.2847 | 3.5866 | 1.7122 | 1.9041 | 2.0204 | 2.6240 | 1.0477 | 2.9153 | 1.9519 |

|                           |        |        |        |        |        |        |        |        |        |        |        |        |        |        |        |        |        |        |        |        |        |        |        |        |        |
|---------------------------|--------|--------|--------|--------|--------|--------|--------|--------|--------|--------|--------|--------|--------|--------|--------|--------|--------|--------|--------|--------|--------|--------|--------|--------|--------|
| A_23_P23502               | OR6N1  | 2.3183 | 2.2245 | 2.6640 | 2.8707 | 4.2373 | 2.0630 | 2.8430 | 1.9109 | 2.4603 | 0.7688 | 2.8908 | 1.9546 | 2.0177 | 1.9898 | 1.9758 | 1.2567 | 2.9940 | 1.8372 | 2.1124 | 2.0531 | 2.2801 | 1.2656 | 3.6500 | 2.1514 |
| CUST_820_Pi4<br>16261804  | OR6N1  | 1.9978 | 2.1772 | 1.7465 | 1.3352 | 1.1882 | 2.0313 | 2.1879 | 1.8107 | 1.6618 | 0.7432 | 1.6266 | 1.9494 | 1.8579 | 2.1138 | 1.6670 | 1.5754 | 1.1326 | 1.7235 | 1.8659 | 1.9874 | 1.6001 | 1.4609 | 1.1980 | 1.7310 |
| CUST_303_Pi4<br>16573500  | OR6N2  | 2.6503 | 2.1624 | 3.5323 | 1.7770 | 4.6789 | 1.8894 | 2.9671 | 3.4939 | 2.9778 | 3.0021 | 3.2629 | 1.7350 | 2.0225 | 1.7817 | 2.8582 | 1.2547 | 2.0085 | 1.7030 | 2.6253 | 1.7393 | 3.2552 | 1.8833 | 3.7513 | 2.0531 |
| CUST_311_Pi4<br>16379584  | OR6N2  | 1.9003 | 1.9147 | 1.7687 | 0.9002 | 0.9982 | 1.4957 | 2.2388 | 2.1041 | 1.3752 | 0.7432 | 1.2874 | 1.4846 | 1.6801 | 1.6131 | 1.4606 | 1.1654 | 0.8364 | 2.1083 | 1.8939 | 1.7201 | 2.1841 | 0.7688 | 0.8601 | 1.6799 |
| CUST_151_Pi4<br>16573500  | OR6Q1  | 2.0291 | 2.1760 | 3.8398 | 2.1041 | 4.2231 | 2.1981 | 2.1439 | 2.7192 | 3.4135 | 3.8102 | 3.3342 | 2.0192 | 1.8752 | 2.1774 | 3.1453 | 1.4980 | 2.7547 | 1.8404 | 2.0458 | 1.9427 | 3.2894 | 2.2922 | 4.3288 | 1.6490 |
| CUST_156_Pi4<br>16379584  | OR6Q1  | 1.8681 | 1.6481 | 2.1248 | 0.8271 | 3.1881 | 1.4391 | 2.2573 | 1.3948 | 1.9026 | 0.7432 | 1.0983 | 1.4164 | 1.7088 | 1.4793 | 1.4369 | 0.9601 | 0.7279 | 3.9380 | 2.0167 | 1.4883 | 3.2525 | 0.7432 | 1.3344 | 2.5359 |
| CUST_298_Pi4<br>16573500  | OR6S1  | 1.7748 | 2.2261 | 1.7325 | 1.1970 | 2.5775 | 1.9240 | 2.3763 | 1.7360 | 1.9846 | 0.7432 | 1.4793 | 1.9236 | 2.1500 | 1.9784 | 1.7617 | 1.1949 | 1.5804 | 1.7569 | 1.7752 | 1.9662 | 1.5556 | 1.2229 | 2.7013 | 1.5906 |
| CUST_306_Pi4<br>16379584  | OR6S1  | 1.7238 | 1.7520 | 1.3822 | 0.8781 | 0.7294 | 1.5166 | 2.0151 | 1.4903 | 1.8625 | 0.7432 | 1.1591 | 1.4604 | 1.6197 | 1.5549 | 1.4555 | 0.9889 | 0.7147 | 1.8670 | 1.5620 | 1.5694 | 1.9314 | 0.7688 | 0.8668 | 1.5465 |
| CUST_179_Pi4<br>16573500  | OR6T1  | 1.7482 | 2.0704 | 3.0744 | 2.3950 | 3.4224 | 1.8688 | 1.8501 | 2.9118 | 3.7431 | 1.3365 | 1.9278 | 1.8718 | 1.6734 | 1.9321 | 2.7137 | 1.2397 | 2.7051 | 1.6376 | 1.6808 | 1.9467 | 3.4379 | 1.2318 | 3.6772 | 1.5322 |
| CUST_184_Pi4<br>16379584  | OR6T1  | 1.7727 | 2.0396 | 1.6759 | 1.3726 | 1.2147 | 2.0027 | 2.3095 | 1.6396 | 1.5678 | 0.7432 | 1.5170 | 1.8674 | 1.7243 | 2.0087 | 1.6858 | 1.4748 | 0.9764 | 1.6287 | 2.7183 | 1.8775 | 1.5486 | 1.3704 | 1.0337 | 1.4721 |
| CUST_874_Pi4<br>16573500  | OR6V1  | 2.3584 | 2.0787 | 2.2977 | 2.3435 | 4.0408 | 1.7965 | 1.9952 | 2.8549 | 2.9029 | 1.8423 | 2.0465 | 1.7865 | 1.6862 | 1.8909 | 2.2966 | 2.4330 | 2.5771 | 1.5909 | 1.8802 | 1.9373 | 2.8410 | 1.1884 | 2.3454 | 2.4882 |
| CUST_903_Pi4<br>16379584  | OR6V1  | 2.0488 | 2.1139 | 1.9504 | 1.2493 | 2.5150 | 1.8741 | 2.2804 | 1.6832 | 1.6041 | 1.8543 | 2.2552 | 1.7673 | 1.8303 | 1.9336 | 1.6776 | 1.4428 | 0.9872 | 2.3240 | 1.8794 | 1.9239 | 2.1994 | 1.2329 | 2.6782 | 1.7423 |
| A_23_P123164              | OR6W1P | 6.1003 | 3.0091 | 5.2955 | 4.1259 | 5.7726 | 4.9220 | 5.7066 | 5.1455 | 5.3080 | 4.5970 | 5.0564 | 2.7674 | 4.6236 | 4.8069 | 5.3788 | 3.8194 | 5.2780 | 3.5976 | 5.7501 | 3.8846 | 5.3293 | 4.9727 | 5.5192 | 4.1490 |
| CUST_7136_Pi<br>416261804 | OR6W1P | 1.9129 | 1.9414 | 2.9505 | 1.2665 | 2.8767 | 1.9786 | 2.0782 | 1.4919 | 2.6244 | 0.7432 | 1.9567 | 1.8156 | 1.7935 | 1.9124 | 2.2028 | 1.2474 | 0.6745 | 1.6850 | 1.8334 | 1.7796 | 1.5717 | 1.7255 | 3.6571 | 1.6191 |
| CUST_282_Pi4<br>16573500  | OR6X1  | 1.8088 | 2.2126 | 3.4435 | 2.2214 | 3.0489 | 1.8933 | 1.9711 | 3.4541 | 3.0864 | 3.5747 | 1.3166 | 1.8343 | 1.7304 | 1.8972 | 3.4017 | 1.1809 | 2.5270 | 1.9759 | 1.7619 | 1.9714 | 3.1191 | 3.1835 | 2.6247 | 1.6846 |
| CUST_290_Pi4<br>16379584  | OR6X1  | 2.3398 | 3.7694 | 2.5716 | 0.9699 | 0.9739 | 1.5720 | 2.8127 | 4.2247 | 2.6303 | 2.5584 | 1.6128 | 3.7499 | 1.8502 | 2.9170 | 1.3693 | 1.5317 | 1.2086 | 1.4719 | 1.9671 | 3.2209 | 3.8366 | 0.9369 | 1.0060 | 3.6857 |
| A_23_P85963               | OR6Y1  | 2.5020 | 1.8990 | 2.3949 | 2.4695 | 4.0364 | 1.8186 | 2.1129 | 3.6347 | 3.0149 | 3.8219 | 1.9464 | 1.6193 | 1.7225 | 2.8825 | 1.9537 | 0.9897 | 2.8713 | 1.6018 | 1.8941 | 1.7048 | 2.2005 | 3.1282 | 2.2554 | 1.6043 |
| CUST_2075_Pi<br>416261804 | OR6Y1  | 1.7251 | 2.0977 | 1.6265 | 1.1732 | 1.1343 | 1.8845 | 1.8119 | 1.6656 | 1.7569 | 0.7432 | 1.5178 | 1.8833 | 1.6986 | 1.9578 | 1.7383 | 1.2632 | 0.9849 | 1.6606 | 1.6764 | 2.0001 | 1.7756 | 1.2015 | 1.8835 | 1.5600 |
| A_24_P357535              | OR7A10 | 1.7930 | 2.0204 | 1.8544 | 1.2288 | 2.4636 | 2.2915 | 1.9123 | 1.6669 | 1.5337 | 0.7432 | 1.4388 | 1.8552 | 2.1975 | 1.9754 | 2.0000 | 1.1766 | 0.9213 | 1.7672 | 1.6985 | 1.8165 | 1.5095 | 1.3054 | 1.8731 | 1.6414 |
| CUST_1751_Pi<br>416261804 | OR7A10 | 3.0055 | 1.9689 | 3.5278 | 1.1254 | 3.5228 | 1.7704 | 3.8113 | 1.5518 | 3.4077 | 0.7432 | 3.3728 | 1.6844 | 1.8635 | 1.8293 | 2.4139 | 1.2697 | 3.5287 | 1.6304 | 2.2746 | 1.7998 | 3.4943 | 1.1735 | 4.6216 | 1.8188 |
| A_23_P28023               | OR7A17 | 2.1034 | 2.1599 | 2.8466 | 1.5158 | 2.9096 | 2.2736 | 2.2351 | 1.7271 | 3.1055 | 2.5927 | 2.7815 | 1.9804 | 1.9642 | 2.1837 | 2.2181 | 1.5917 | 1.0254 | 1.8320 | 1.9673 | 1.9280 | 2.2442 | 1.6742 | 2.5271 | 1.7678 |
| A_23_P16630               | OR7A5  | 1.9068 | 2.1784 | 1.5886 | 1.1885 | 1.6177 | 2.0422 | 2.0416 | 1.6942 | 1.6987 | 0.7432 | 3.2419 | 1.8444 | 1.7704 | 1.9893 | 1.5741 | 1.1529 | 1.8655 | 1.7771 | 1.8054 | 2.0471 | 1.5215 | 1.3565 | 2.4225 | 2.1344 |
| CUST_2370_Pi<br>416261804 | OR7A5  | 1.9217 | 1.7225 | 1.8187 | 2.0947 | 2.6111 | 1.8074 | 2.1344 | 1.5625 | 3.0641 | 0.7432 | 0.9564 | 1.5676 | 1.7978 | 1.6654 | 1.9206 | 1.6122 | 0.7783 | 1.6590 | 1.8170 | 1.5093 | 3.0397 | 1.2031 | 1.1534 | 1.7252 |

|                           |          |        |        |        |        |        |        |        |        |        |        |        |        |        |        |        |        |        |        |        |        |        |        |        |        |
|---------------------------|----------|--------|--------|--------|--------|--------|--------|--------|--------|--------|--------|--------|--------|--------|--------|--------|--------|--------|--------|--------|--------|--------|--------|--------|--------|
| CUST_113_Pi4<br>16573500  | OR7C1    | 1.7301 | 2.5983 | 1.5509 | 1.2321 | 0.9600 | 2.5663 | 1.7908 | 2.6740 | 1.6986 | 0.7432 | 1.4476 | 2.6502 | 1.6156 | 1.9567 | 1.6379 | 1.2492 | 0.9504 | 1.9988 | 1.6583 | 1.9237 | 2.1758 | 1.3256 | 1.4638 | 1.5037 |
| CUST_117_Pi4<br>16379584  | OR7C1    | 1.8657 | 2.0130 | 1.6048 | 1.2645 | 1.1518 | 1.9327 | 2.0496 | 1.6262 | 1.5023 | 0.7432 | 1.4664 | 1.7669 | 1.7277 | 1.9212 | 1.5947 | 1.4265 | 0.9653 | 1.5820 | 1.7637 | 1.8588 | 1.5042 | 1.2897 | 1.0142 | 1.4956 |
| A_23_P108265              | OR7C2    | 2.3993 | 2.2516 | 2.9551 | 1.2669 | 4.3348 | 2.0402 | 2.6101 | 2.8559 | 3.1152 | 2.4142 | 3.0732 | 1.9095 | 2.3025 | 1.9633 | 2.4145 | 2.4059 | 2.3342 | 1.8299 | 2.1367 | 2.0828 | 2.5494 | 1.3798 | 4.5615 | 1.9757 |
| CUST_1059_Pi<br>416261804 | OR7C2    | 1.7872 | 2.2873 | 1.6824 | 1.5330 | 1.2217 | 2.7202 | 1.8078 | 3.1902 | 2.0297 | 1.4824 | 1.6375 | 1.9899 | 1.6605 | 2.1274 | 1.7433 | 2.2012 | 1.2945 | 1.9184 | 1.6782 | 2.0419 | 2.3353 | 1.9306 | 1.8638 | 2.2218 |
| A_23_P410408              | OR7D2    | 1.6603 | 1.9544 | 1.4582 | 1.0700 | 1.3703 | 1.8289 | 1.7540 | 1.5404 | 1.8032 | 0.7432 | 1.1933 | 1.6142 | 1.5638 | 1.7228 | 1.5463 | 1.0942 | 0.7173 | 1.4712 | 1.6077 | 1.7540 | 1.4015 | 1.1302 | 0.9170 | 1.4467 |
| CUST_1031_Pi<br>416261804 | OR7D2    | 1.8898 | 2.1490 | 1.6488 | 0.9609 | 0.8706 | 1.6817 | 2.1229 | 1.6103 | 1.5532 | 0.7432 | 1.6640 | 1.5838 | 1.6476 | 1.6906 | 2.0094 | 1.1082 | 0.8630 | 1.4547 | 1.7251 | 1.8270 | 2.2761 | 0.9747 | 1.0067 | 1.5990 |
| A_23_P130547              | OR7D4    | 2.0498 | 1.9539 | 2.1599 | 1.0877 | 2.2569 | 1.7739 | 2.3434 | 1.5904 | 1.6588 | 0.7432 | 1.7493 | 1.6491 | 1.7691 | 1.7776 | 1.8918 | 1.2080 | 0.7166 | 1.5858 | 2.2956 | 4.1310 | 2.6718 | 1.1415 | 2.6951 | 1.7223 |
| CUST_6531_Pi<br>416261804 | OR7D4    | 2.0072 | 2.1275 | 1.6375 | 1.1617 | 2.1334 | 1.8205 | 2.2065 | 1.6158 | 1.8760 | 0.7432 | 1.6049 | 1.7902 | 1.8170 | 1.8556 | 1.6146 | 1.3098 | 0.9575 | 1.5689 | 1.8854 | 1.8306 | 1.5454 | 1.1674 | 1.8393 | 1.6746 |
| A_24_P384018              | OR7E156P | 5.7400 | 5.9271 | 6.5679 | 6.7950 | 6.5084 | 5.6726 | 6.2831 | 5.7441 | 6.2838 | 6.4531 | 6.0732 | 5.7277 | 6.1975 | 5.2063 | 6.6759 | 5.7731 | 5.8723 | 5.6738 | 6.7090 | 6.0965 | 6.3473 | 6.9341 | 6.3415 | 5.6516 |
| A_32_P32391               | OR7E156P | 6.6077 | 5.9516 | 6.3955 | 6.9488 | 6.7984 | 6.1202 | 6.9087 | 5.7035 | 6.2756 | 6.7532 | 6.4249 | 5.4979 | 6.3072 | 5.2973 | 6.4317 | 5.7429 | 5.7464 | 5.7122 | 6.7634 | 6.3178 | 6.8083 | 6.8768 | 6.5231 | 6.6627 |
| A_23_P16110               | OR7E24   | 5.9905 | 5.3210 | 6.3571 | 6.4132 | 6.7403 | 5.6703 | 6.3397 | 5.5408 | 6.1132 | 6.1744 | 6.0864 | 5.0488 | 6.2271 | 4.8133 | 6.3211 | 5.4875 | 5.5251 | 5.2661 | 6.3875 | 5.4288 | 6.2885 | 6.5072 | 6.3373 | 5.6042 |
| CUST_1091_Pi<br>416261804 | OR7E24   | 2.1967 | 2.0204 | 1.8166 | 1.0770 | 1.7964 | 1.6700 | 2.0436 | 2.2446 | 1.8864 | 0.7432 | 1.5137 | 1.6975 | 1.7264 | 1.7979 | 1.8562 | 1.2147 | 1.0633 | 1.5363 | 1.7267 | 1.8993 | 1.5891 | 1.0529 | 1.1400 | 1.6198 |
| CUST_7089_Pi<br>416261804 | OR7E36P  | 7.5332 | 5.9325 | 6.9958 | 7.1068 | 7.0255 | 6.4193 | 6.9187 | 6.0146 | 6.7352 | 7.0171 | 6.5852 | 5.7676 | 6.8643 | 5.8895 | 6.9889 | 6.3537 | 6.3065 | 6.4158 | 7.4280 | 6.4673 | 7.0203 | 7.3861 | 6.7825 | 6.5952 |
| A_23_P408930              | OR7E5P   | 3.9919 | 2.7195 | 4.5750 | 4.7061 | 3.7692 | 2.9104 | 4.4548 | 2.9227 | 4.5281 | 5.1208 | 2.8015 | 2.1988 | 3.7077 | 2.3458 | 4.3326 | 4.3118 | 3.5401 | 2.6532 | 4.5818 | 3.1150 | 4.0724 | 3.9373 | 2.8032 | 3.1775 |
| A_23_P433218              | OR7E91P  | 6.3591 | 6.8110 | 6.0276 | 6.4728 | 6.0630 | 5.4326 | 6.8862 | 6.3122 | 5.9274 | 6.4964 | 5.1968 | 4.1610 | 6.2662 | 6.3500 | 5.7453 | 5.8467 | 5.5580 | 5.8282 | 7.0174 | 6.3322 | 5.9218 | 6.2565 | 5.7065 | 6.4184 |
| A_24_P332718              | OR7E91P  | 2.2537 | 2.3893 | 2.7264 | 1.7713 | 2.8776 | 2.5572 | 2.3044 | 1.7066 | 3.0870 | 3.5869 | 1.7032 | 2.1600 | 1.9764 | 2.2665 | 2.4295 | 3.0455 | 3.5367 | 2.0940 | 2.0692 | 2.1273 | 3.0525 | 1.9599 | 2.5490 | 1.9234 |
| CUST_248_Pi4<br>16379584  | OR7G1    | 3.9726 | 3.3759 | 3.9527 | 3.5511 | 3.5907 | 3.8383 | 3.8466 | 4.0437 | 3.7672 | 4.1135 | 2.6432 | 2.4443 | 4.2833 | 3.7920 | 4.0254 | 3.4786 | 3.2281 | 3.8615 | 3.3649 | 2.1581 | 3.1863 | 4.4143 | 2.8806 | 4.0900 |
| CUST_335_Pi4<br>16573500  | OR7G2    | 1.6555 | 1.9325 | 1.5598 | 1.1499 | 1.9587 | 1.7811 | 1.6961 | 1.5645 | 1.8043 | 0.7432 | 1.4123 | 1.6835 | 1.6100 | 1.8384 | 1.6866 | 4.4351 | 0.9059 | 1.4667 | 1.5649 | 1.7508 | 1.4385 | 1.1271 | 1.0312 | 1.4121 |
| CUST_344_Pi4<br>16379584  | OR7G2    | 2.2807 | 2.4055 | 3.2748 | 2.4170 | 4.0865 | 1.9420 | 2.5085 | 1.7796 | 4.0252 | 3.6518 | 2.0217 | 2.0011 | 1.8836 | 2.0358 | 3.2092 | 1.3542 | 3.8978 | 1.7591 | 2.3067 | 2.2059 | 3.6853 | 1.3218 | 2.8640 | 1.9950 |
| A_23_P141939              | OR7G3    | 1.7634 | 2.1556 | 1.7578 | 1.3026 | 1.6484 | 1.9621 | 1.8616 | 1.8664 | 2.1344 | 0.7432 | 1.6548 | 1.9396 | 1.7113 | 2.0741 | 1.7545 | 1.3882 | 1.0688 | 1.7054 | 1.6582 | 1.9754 | 2.1409 | 1.3185 | 1.5994 | 1.5482 |
| CUST_1434_Pi<br>416261804 | OR7G3    | 2.2514 | 2.2448 | 2.2851 | 1.1141 | 0.9938 | 1.8874 | 2.5965 | 2.3253 | 1.5124 | 2.7266 | 1.6999 | 2.4015 | 1.8318 | 2.6379 | 2.1816 | 1.5173 | 1.0587 | 2.5091 | 2.5451 | 2.0120 | 2.6556 | 1.5675 | 1.1828 | 2.9958 |
| CUST_404_Pi4<br>16573500  | OR8A1    | 1.7624 | 2.1108 | 1.6389 | 1.2326 | 0.9708 | 1.8964 | 1.8949 | 1.8074 | 1.6209 | 0.7432 | 1.6214 | 1.9139 | 1.7463 | 2.0392 | 1.7703 | 1.3320 | 1.1500 | 1.7205 | 1.6526 | 1.9323 | 1.5853 | 1.2575 | 1.1515 | 2.0501 |

|                           |        |        |        |        |        |        |        |        |        |        |        |        |        |        |        |        |        |        |        |        |        |        |        |        |        |
|---------------------------|--------|--------|--------|--------|--------|--------|--------|--------|--------|--------|--------|--------|--------|--------|--------|--------|--------|--------|--------|--------|--------|--------|--------|--------|--------|
| CUST_413_P14<br>16379584  | OR8A1  | 1.6658 | 1.7930 | 1.8821 | 0.9586 | 1.9348 | 1.6617 | 1.7996 | 1.3430 | 2.1086 | 0.7432 | 1.0365 | 1.5216 | 1.6296 | 1.6312 | 1.7092 | 0.9266 | 0.6745 | 1.5095 | 1.6081 | 2.1918 | 1.4410 | 1.9193 | 0.9130 | 2.9904 |
| CUST_241_P14<br>16573500  | OR8B12 | 2.9706 | 2.3472 | 3.5082 | 2.5789 | 5.3273 | 2.2696 | 3.2462 | 4.5451 | 4.7163 | 4.3576 | 3.9125 | 1.8899 | 3.2023 | 4.5611 | 4.6961 | 4.1084 | 4.5194 | 1.9831 | 2.7325 | 2.9424 | 3.8805 | 3.8011 | 4.6270 | 2.3716 |
| CUST_249_P14<br>16379584  | OR8B12 | 2.3343 | 2.0859 | 2.2395 | 1.2283 | 1.1756 | 2.2239 | 2.6334 | 2.2908 | 1.5951 | 0.7432 | 1.5398 | 1.7363 | 1.9914 | 2.4382 | 1.5204 | 1.4851 | 1.6394 | 1.6807 | 2.1178 | 1.7979 | 2.5615 | 1.2633 | 1.1693 | 1.9614 |
| CUST_333_P14<br>16573500  | OR8B2  | 1.6904 | 1.6993 | 1.9810 | 0.8761 | 2.6575 | 1.5336 | 1.9554 | 1.3996 | 2.0657 | 1.3793 | 1.5427 | 1.4669 | 1.6556 | 1.5722 | 1.8546 | 0.9690 | 1.5774 | 1.4257 | 1.5585 | 1.5192 | 2.2973 | 0.8919 | 2.4404 | 1.4907 |
| CUST_450_P14<br>16379584  | OR8B2  | 2.6435 | 3.2443 | 1.7792 | 1.3125 | 1.1318 | 2.5751 | 2.3674 | 2.1109 | 1.7754 | 1.4242 | 1.6004 | 1.8490 | 1.7892 | 2.5881 | 1.5340 | 1.5278 | 0.9632 | 2.4136 | 2.0001 | 3.6373 | 1.5688 | 1.3843 | 1.2006 | 2.4685 |
| CUST_342_P14<br>16379584  | OR8B3  | 3.0624 | 1.9781 | 2.8260 | 1.3672 | 4.7468 | 2.0303 | 2.9481 | 3.5464 | 3.1404 | 1.4500 | 3.5229 | 1.7046 | 2.2068 | 1.8813 | 3.5985 | 2.4412 | 1.5339 | 1.6690 | 2.1420 | 2.3720 | 3.0048 | 1.3702 | 3.8171 | 1.7951 |
| CUST_336_P14<br>16573500  | OR8B4  | 1.8271 | 2.3492 | 1.8744 | 1.3655 | 1.2865 | 2.0828 | 1.8708 | 1.7984 | 1.7160 | 0.7432 | 1.8315 | 2.1437 | 1.7715 | 2.0880 | 1.9062 | 1.3958 | 1.3217 | 1.8620 | 1.7704 | 2.2325 | 1.6474 | 1.3955 | 1.3998 | 1.6676 |
| CUST_345_P14<br>16379584  | OR8B4  | 2.2318 | 2.0150 | 1.4517 | 1.0916 | 0.7138 | 1.7305 | 1.8801 | 2.1098 | 1.4615 | 0.7432 | 1.3548 | 1.6953 | 1.6656 | 1.7787 | 1.5545 | 1.1023 | 0.8701 | 1.6994 | 1.6024 | 1.7272 | 1.4401 | 1.0288 | 0.9847 | 1.4754 |
| A_23_P1819                | OR8B8  | 3.4319 | 2.1282 | 3.8309 | 4.3411 | 4.6489 | 3.3316 | 3.5966 | 3.2559 | 4.0320 | 4.9351 | 4.0529 | 1.7425 | 2.6949 | 4.0435 | 4.1154 | 3.5596 | 3.0694 | 2.1335 | 2.7640 | 1.6966 | 3.7214 | 5.3053 | 3.8556 | 3.1300 |
| CUST_1581_P1<br>416261804 | OR8B8  | 2.1776 | 3.9976 | 1.7512 | 1.5122 | 1.0670 | 3.7718 | 2.3200 | 2.8665 | 1.8608 | 1.1762 | 1.6794 | 2.0411 | 1.8659 | 2.6144 | 1.7772 | 1.5713 | 0.9341 | 2.8983 | 3.0896 | 3.4541 | 2.2530 | 2.5437 | 1.4728 | 2.6555 |
| A_23_P127662              | OR8D1  | 1.8623 | 2.4179 | 2.3565 | 1.2811 | 3.1304 | 2.1278 | 1.9423 | 2.8606 | 2.5059 | 0.8910 | 2.8648 | 2.0788 | 1.7846 | 2.1789 | 1.9076 | 1.3502 | 3.7287 | 1.9036 | 1.8812 | 2.3412 | 1.8979 | 1.3163 | 3.3406 | 1.7178 |
| CUST_1503_P1<br>416261804 | OR8D1  | 1.8357 | 2.1226 | 1.9954 | 1.0103 | 0.7126 | 2.1032 | 2.1060 | 1.6750 | 1.4757 | 0.8622 | 1.2983 | 1.6192 | 1.6871 | 1.8352 | 1.3764 | 1.0299 | 0.7332 | 3.2527 | 1.7122 | 3.6226 | 2.0054 | 0.9361 | 1.2562 | 1.8444 |
| A_23_P139050              | OR8D2  | 2.1353 | 2.1349 | 1.8339 | 1.0981 | 2.9912 | 1.9518 | 2.4138 | 1.6487 | 1.4862 | 0.7432 | 1.6364 | 1.7884 | 1.9341 | 1.8125 | 1.5346 | 1.0055 | 0.7492 | 1.8265 | 2.6622 | 1.8627 | 1.9494 | 1.1961 | 2.7496 | 2.0415 |
| CUST_2150_P1<br>416261804 | OR8D2  | 2.1942 | 2.0955 | 2.2232 | 1.8350 | 2.1453 | 3.6052 | 2.3939 | 1.6824 | 2.1053 | 0.7432 | 2.2933 | 1.8708 | 2.1633 | 2.1006 | 1.7032 | 1.4862 | 1.0837 | 1.7986 | 2.0447 | 2.0796 | 2.3963 | 1.4758 | 2.1887 | 1.8947 |
| CUST_444_P14<br>16573500  | OR8D4  | 1.6821 | 1.9982 | 1.5911 | 1.1643 | 1.5754 | 1.8913 | 1.7421 | 1.5760 | 1.5778 | 0.7432 | 1.3085 | 1.7119 | 1.5785 | 1.8244 | 1.6250 | 1.2096 | 0.7159 | 1.5155 | 1.6325 | 1.8230 | 1.4462 | 1.2186 | 1.1105 | 1.4579 |
| CUST_453_P14<br>16379584  | OR8D4  | 1.6156 | 1.9539 | 1.5806 | 0.9328 | 1.9288 | 1.8512 | 1.8265 | 1.5175 | 1.3686 | 0.7432 | 1.1707 | 1.5387 | 1.5336 | 1.6406 | 1.4976 | 1.0735 | 0.6745 | 1.4176 | 1.5633 | 2.5906 | 1.3430 | 0.9675 | 0.8425 | 1.4530 |
| A_23_P13195               | OR8G1  | 1.9480 | 2.1577 | 1.5392 | 1.1717 | 0.9085 | 1.8919 | 2.0836 | 1.6457 | 1.5807 | 0.7432 | 1.5877 | 1.7801 | 1.7680 | 1.8621 | 1.5777 | 1.1999 | 1.0658 | 1.6739 | 1.8060 | 1.9849 | 1.5333 | 1.2531 | 1.2692 | 1.7106 |
| CUST_1487_P1<br>416261804 | OR8G1  | 1.7727 | 2.2208 | 1.6367 | 1.2657 | 2.2094 | 2.0174 | 1.8218 | 1.7999 | 1.5904 | 0.8231 | 3.1490 | 1.9245 | 1.6750 | 1.9991 | 1.7468 | 1.2941 | 0.9948 | 1.7049 | 1.7018 | 2.0974 | 1.4611 | 1.3156 | 5.4196 | 1.5772 |
| A_23_P52868               | OR8G2  | 2.1785 | 2.3448 | 1.5120 | 1.5646 | 1.5637 | 1.7361 | 2.4999 | 1.7301 | 1.7575 | 1.2299 | 1.5808 | 1.7485 | 1.7725 | 3.0997 | 1.5913 | 1.2653 | 1.0332 | 1.5814 | 1.9448 | 2.0398 | 2.3232 | 2.3030 | 2.1950 | 1.9175 |
| CUST_185_P14<br>16573500  | OR8G2  | 2.2737 | 2.4680 | 1.4551 | 0.9000 | 0.8778 | 1.5132 | 1.9736 | 1.6257 | 1.4468 | 0.7432 | 2.0205 | 1.5569 | 1.6276 | 1.6493 | 1.5192 | 1.1940 | 1.0432 | 1.4235 | 1.6066 | 1.8513 | 1.4497 | 1.5948 | 0.9860 | 2.5664 |
| CUST_190_P14<br>16379584  | OR8G2  | 3.1100 | 2.9094 | 4.1689 | 3.4292 | 5.0484 | 1.9028 | 3.4134 | 2.9982 | 4.1414 | 3.5299 | 3.6112 | 1.6587 | 2.1008 | 2.4858 | 3.9656 | 0.9611 | 2.5899 | 2.0224 | 3.2973 | 2.6532 | 3.9028 | 2.3652 | 4.6613 | 2.4522 |
| CUST_242_P14<br>16573500  | OR8G5  | 1.6582 | 1.9597 | 1.4869 | 1.1195 | 0.7345 | 1.7977 | 1.7235 | 1.5797 | 1.4857 | 0.7432 | 1.3611 | 1.7155 | 1.6201 | 1.8101 | 1.6044 | 1.1112 | 0.8191 | 1.4835 | 1.5880 | 1.7146 | 1.4311 | 1.1074 | 0.9954 | 1.7367 |
| CUST_250_P14<br>16379584  | OR8G5  | 2.6503 | 2.3727 | 2.4766 | 1.9709 | 0.8129 | 1.5841 | 2.3588 | 2.3133 | 1.7899 | 0.7432 | 1.7517 | 1.7275 | 1.6660 | 1.7815 | 1.4820 | 1.2444 | 0.7920 | 1.5834 | 1.8001 | 3.7568 | 2.8575 | 1.5718 | 1.1736 | 2.5071 |
| A_23_P75707               | OR8H1  | 1.9512 | 1.9068 | 2.7791 | 1.9984 | 3.8147 | 1.8744 | 2.1672 | 1.5444 | 2.8617 | 2.7255 | 2.4097 | 1.7381 | 1.8454 | 2.1129 | 3.3039 | 1.0534 | 0.8379 | 1.7465 | 1.7999 | 1.6878 | 3.0657 | 1.2502 | 2.8437 | 1.7576 |

|                           |       |        |        |        |        |        |        |        |        |        |        |        |        |        |        |        |        |        |        |        |        |        |        |        |        |
|---------------------------|-------|--------|--------|--------|--------|--------|--------|--------|--------|--------|--------|--------|--------|--------|--------|--------|--------|--------|--------|--------|--------|--------|--------|--------|--------|
| CUST_1761_Pi<br>416261804 | OR8H1 | 2.3348 | 2.0316 | 2.9973 | 1.3044 | 2.2914 | 2.1735 | 2.6111 | 1.6355 | 2.2191 | 2.2970 | 1.3752 | 1.8764 | 2.0291 | 2.0316 | 1.6936 | 1.2890 | 2.8473 | 1.9037 | 2.2837 | 1.8181 | 3.1591 | 1.6334 | 2.6138 | 2.0260 |
| CUST_457_Pi4<br>16573500  | OR8H2 | 2.3674 | 2.1932 | 3.8327 | 2.6408 | 4.0966 | 2.3242 | 2.5993 | 2.7311 | 3.8943 | 3.5926 | 3.1965 | 1.9874 | 2.1144 | 2.2074 | 3.8195 | 2.6348 | 3.5023 | 1.9149 | 2.6296 | 1.9409 | 2.9551 | 1.8202 | 4.3723 | 2.9370 |
| CUST_466_Pi4<br>16379584  | OR8H2 | 1.8858 | 1.9353 | 2.6450 | 1.2082 | 3.4007 | 1.9503 | 2.2110 | 2.1580 | 2.7484 | 0.9334 | 5.3362 | 1.7516 | 1.7212 | 1.8409 | 2.2436 | 1.1889 | 2.6699 | 1.6089 | 1.7803 | 1.7585 | 1.5169 | 2.3878 | 3.3704 | 1.5648 |
| CUST_243_Pi4<br>16573500  | OR8H3 | 1.6734 | 2.1170 | 1.7195 | 1.1593 | 0.8167 | 1.8348 | 1.7295 | 1.7052 | 1.5473 | 0.7432 | 1.4919 | 1.8602 | 1.6857 | 1.9357 | 1.7317 | 1.1970 | 1.0391 | 1.6547 | 1.6311 | 2.0089 | 1.4817 | 1.1586 | 1.0642 | 1.5242 |
| CUST_251_Pi4<br>16379584  | OR8H3 | 2.2143 | 2.3456 | 2.2636 | 1.4451 | 3.4317 | 3.4052 | 2.5496 | 1.7442 | 2.6133 | 1.6000 | 1.2102 | 1.6402 | 1.8441 | 2.4239 | 2.0043 | 1.1197 | 2.4553 | 1.6025 | 2.0740 | 1.7605 | 2.3835 | 1.7388 | 3.1849 | 1.8823 |
| CUST_362_Pi4<br>16573500  | OR8I2 | 1.7143 | 1.8930 | 1.4844 | 0.9668 | 1.0280 | 1.5911 | 1.9241 | 1.5308 | 1.4784 | 0.7432 | 1.3796 | 1.6172 | 1.6702 | 1.6728 | 2.1306 | 1.1331 | 0.9431 | 1.4725 | 1.6313 | 1.7898 | 1.4903 | 0.9523 | 1.0013 | 1.5605 |
| CUST_371_Pi4<br>16379584  | OR8I2 | 1.7902 | 2.0363 | 1.4471 | 1.0565 | 0.8519 | 1.8600 | 1.9857 | 1.4969 | 1.4158 | 0.7432 | 1.1667 | 1.5878 | 1.6252 | 1.7056 | 1.4378 | 1.2579 | 0.6745 | 1.4826 | 1.6738 | 2.8711 | 1.8619 | 2.0446 | 0.9163 | 3.3486 |
| A_23_P13244               | OR8J1 | 2.6702 | 2.1146 | 2.4796 | 1.2184 | 1.1916 | 1.9222 | 3.1199 | 1.7275 | 2.6923 | 1.1617 | 1.9263 | 1.8080 | 2.3677 | 1.9942 | 2.4317 | 1.5293 | 1.0844 | 2.3059 | 2.9078 | 1.9266 | 2.3710 | 1.3004 | 1.7853 | 3.3645 |
| CUST_1234_Pi<br>416261804 | OR8J1 | 1.9114 | 2.0258 | 2.9380 | 1.1639 | 1.9461 | 1.7670 | 2.1296 | 1.6224 | 3.5133 | 2.6473 | 1.4779 | 1.7166 | 1.7451 | 1.8803 | 2.4607 | 1.2140 | 0.9137 | 1.5408 | 1.7668 | 1.8659 | 3.6480 | 1.1392 | 2.2795 | 1.6201 |
| CUST_369_Pi4<br>16573500  | OR8J3 | 1.7952 | 1.9173 | 1.5503 | 1.1888 | 1.7705 | 1.8946 | 1.9370 | 1.4951 | 1.5336 | 0.7432 | 1.3505 | 1.7118 | 1.9294 | 1.8293 | 2.1418 | 1.1304 | 2.3426 | 1.5648 | 1.6803 | 1.6710 | 2.1134 | 1.2193 | 1.1338 | 2.3612 |
| CUST_378_Pi4<br>16379584  | OR8J3 | 1.8286 | 2.5683 | 1.6482 | 1.3216 | 1.2164 | 2.8363 | 1.8676 | 1.8814 | 1.6316 | 0.7688 | 1.7833 | 2.0954 | 1.6831 | 2.8985 | 1.7783 | 1.3447 | 1.0837 | 1.7441 | 1.7142 | 3.4545 | 1.5744 | 3.2491 | 1.2602 | 1.5928 |
| CUST_347_Pi4<br>16573500  | OR8K1 | 1.7131 | 1.8276 | 1.4162 | 1.0020 | 0.8231 | 1.6806 | 1.9311 | 1.4426 | 1.4563 | 0.7432 | 1.1620 | 1.5707 | 1.6677 | 1.6802 | 2.1215 | 1.0652 | 0.7160 | 1.5110 | 1.6317 | 1.6439 | 1.4321 | 1.0620 | 0.9031 | 2.4586 |
| CUST_356_Pi4<br>16379584  | OR8K1 | 2.0755 | 2.2578 | 1.7460 | 2.0747 | 0.9348 | 2.8840 | 2.0956 | 1.5625 | 1.4781 | 8.2915 | 1.2577 | 2.1648 | 1.5042 | 1.7654 | 1.5095 | 1.0813 | 0.6987 | 2.8463 | 1.5383 | 3.6009 | 1.9859 | 2.8614 | 0.9101 | 1.7670 |
| A_23_P36050               | OR8K3 | 1.9688 | 2.3307 | 1.6214 | 1.1664 | 0.8478 | 2.1524 | 2.0066 | 2.0416 | 1.6585 | 0.7432 | 1.5159 | 2.0030 | 1.8127 | 1.9715 | 1.6027 | 1.2752 | 0.8226 | 1.6885 | 1.8183 | 2.1735 | 1.6011 | 1.2178 | 1.8383 | 1.8472 |
| CUST_855_Pi4<br>16261804  | OR8K3 | 1.7580 | 2.1069 | 1.5734 | 1.2211 | 0.8846 | 1.9066 | 2.1766 | 1.7524 | 2.8014 | 0.7432 | 1.6617 | 1.7061 | 1.6375 | 1.9135 | 1.6331 | 1.2130 | 0.8333 | 1.6414 | 1.6244 | 1.9031 | 2.0764 | 1.2521 | 1.4801 | 1.4828 |
| CUST_138_Pi4<br>16573500  | OR8K5 | 1.9333 | 2.3560 | 1.6666 | 3.2638 | 0.9279 | 2.0477 | 2.1789 | 1.6746 | 1.6151 | 0.7432 | 1.6723 | 1.9420 | 1.7861 | 1.9892 | 1.7538 | 1.3105 | 0.8937 | 2.5891 | 1.7867 | 1.9941 | 1.6440 | 1.3232 | 1.2907 | 1.7242 |
| CUST_143_Pi4<br>16379584  | OR8K5 | 2.0351 | 2.2731 | 1.6051 | 1.2358 | 0.8840 | 2.0004 | 2.1759 | 2.5692 | 1.5826 | 0.7432 | 1.6394 | 1.8108 | 1.7567 | 1.9128 | 1.5678 | 1.3020 | 0.8107 | 1.5693 | 1.8756 | 1.9257 | 2.0961 | 1.2688 | 1.2214 | 1.6689 |
| CUST_198_Pi4<br>16573500  | OR8S1 | 3.7575 | 1.9229 | 2.9964 | 1.1548 | 4.6058 | 2.3798 | 3.8838 | 3.8849 | 3.6503 | 2.1916 | 2.4355 | 3.3154 | 2.5109 | 3.4300 | 1.7103 | 2.4730 | 0.6841 | 2.4988 | 4.1058 | 1.8538 | 3.6428 | 1.2512 | 3.9541 | 4.2638 |
| CUST_203_Pi4<br>16379584  | OR8S1 | 2.7996 | 3.4726 | 2.9499 | 3.4471 | 2.5178 | 3.4451 | 3.1997 | 3.2815 | 2.9903 | 3.5171 | 3.8355 | 3.5372 | 1.7750 | 1.8286 | 2.6540 | 2.0013 | 2.4468 | 2.5217 | 2.2799 | 2.6528 | 2.4689 | 2.4505 | 2.6806 | 3.3869 |
| A_23_P24676               | OR8U1 | 1.7773 | 1.7083 | 2.4066 | 0.9752 | 3.7371 | 1.7038 | 1.9416 | 3.0502 | 2.0269 | 1.9076 | 2.3101 | 1.5188 | 1.7007 | 1.6041 | 1.6554 | 0.9711 | 0.6745 | 1.5509 | 2.1785 | 1.5273 | 1.9050 | 1.0913 | 2.3532 | 1.5560 |
| CUST_147_Pi4<br>16573500  | OR8U1 | 1.7830 | 2.0594 | 1.5977 | 1.3158 | 1.0531 | 2.0662 | 1.8741 | 1.6264 | 1.4977 | 0.7432 | 1.4163 | 1.8335 | 1.6747 | 1.9688 | 1.5650 | 1.3236 | 0.7591 | 1.6033 | 1.7229 | 1.8667 | 1.4997 | 1.3727 | 1.0762 | 1.4739 |
| CUST_5340_Pi<br>416261804 | OR8U1 | 1.9417 | 1.9567 | 1.5286 | 1.1765 | 0.7728 | 1.8683 | 1.7263 | 1.6318 | 1.5324 | 0.7432 | 1.3876 | 1.6877 | 1.5953 | 1.8445 | 1.5969 | 1.1338 | 0.7606 | 1.4664 | 1.5835 | 1.7362 | 1.4206 | 1.1987 | 1.0364 | 1.4585 |
| CUST_152_Pi4<br>16379584  | OR8U8 | 2.2377 | 2.2002 | 1.5505 | 1.1144 | 0.9437 | 1.8456 | 2.5517 | 1.9985 | 1.8020 | 0.7432 | 2.5279 | 1.9145 | 1.8475 | 1.9229 | 1.5843 | 1.3434 | 1.0499 | 1.6630 | 1.9455 | 2.0393 | 2.2070 | 1.0869 | 1.2487 | 2.0452 |

|                       |       |        |        |        |        |        |        |        |        |        |        |        |        |        |        |        |        |        |        |        |        |        |        |        |        |
|-----------------------|-------|--------|--------|--------|--------|--------|--------|--------|--------|--------|--------|--------|--------|--------|--------|--------|--------|--------|--------|--------|--------|--------|--------|--------|--------|
| CUST_1408_PI416261804 | OR8U9 | 2.1205 | 1.8883 | 2.0880 | 1.1973 | 3.8414 | 1.9104 | 2.3955 | 1.7397 | 3.1659 | 1.2339 | 2.4498 | 1.7160 | 2.0629 | 1.8276 | 1.6337 | 1.0428 | 2.7728 | 1.6725 | 1.9531 | 1.6216 | 2.2775 | 1.2611 | 2.5976 | 1.7748 |
| CUST_467_PI416573500  | OR9A2 | 2.4133 | 1.8931 | 1.6317 | 1.2266 | 1.0275 | 2.0851 | 2.7379 | 1.4852 | 1.6794 | 0.7432 | 1.1954 | 1.7980 | 2.1758 | 1.9124 | 1.5709 | 0.9869 | 0.7838 | 2.1200 | 2.2179 | 1.6573 | 1.7072 | 1.4610 | 1.6182 | 2.3364 |
| CUST_477_PI416379584  | OR9A2 | 3.1375 | 2.9641 | 3.1017 | 1.2423 | 3.3071 | 2.1290 | 3.1071 | 3.6616 | 3.3306 | 3.5808 | 3.8140 | 1.8320 | 2.0271 | 3.0048 | 1.8661 | 2.5785 | 2.8750 | 1.7224 | 2.8773 | 3.2731 | 3.6224 | 2.6427 | 3.5294 | 1.7446 |
| CUST_600_PI416573500  | OR9A4 | 1.8100 | 2.2546 | 1.7720 | 1.4075 | 2.6223 | 2.0174 | 1.8540 | 1.7541 | 1.7280 | 0.7432 | 1.7420 | 1.9408 | 1.7197 | 2.0367 | 1.7788 | 1.4433 | 1.3554 | 1.6245 | 1.7085 | 1.9759 | 1.8748 | 1.3383 | 1.6695 | 1.4937 |
| CUST_616_PI416379584  | OR9A4 | 1.9102 | 2.2710 | 1.6231 | 1.2661 | 1.1546 | 2.0092 | 2.0222 | 1.8453 | 1.5845 | 0.7432 | 1.7133 | 1.9026 | 1.7221 | 1.9923 | 2.1536 | 1.3004 | 1.0430 | 1.6952 | 1.7763 | 2.1203 | 1.4807 | 1.3141 | 1.3040 | 1.6798 |
| CUST_1065_PI416379584 | OR9G1 | 2.0022 | 2.4858 | 2.2453 | 2.1463 | 3.5809 | 2.6553 | 2.1916 | 2.5808 | 2.9401 | 1.7867 | 3.0454 | 3.4946 | 1.8855 | 2.2005 | 1.9266 | 2.7918 | 3.4197 | 1.8494 | 1.9400 | 2.2077 | 2.4653 | 2.7296 | 3.1668 | 2.1395 |
| CUST_149_PI416573500  | OR9G1 | 1.7304 | 2.1275 | 1.7091 | 1.1787 | 1.1341 | 1.9176 | 1.8129 | 1.6994 | 1.6571 | 0.7432 | 1.5196 | 1.8855 | 1.6924 | 1.9757 | 1.7048 | 1.2578 | 0.9656 | 1.6708 | 1.6773 | 2.0236 | 1.7971 | 1.2207 | 1.2228 | 1.5693 |
| CUST_1013_PI416573500 | OR9G4 | 1.5997 | 1.7873 | 1.4204 | 0.9891 | 0.7299 | 1.6469 | 1.6691 | 1.4067 | 1.4580 | 0.7432 | 1.1345 | 1.5700 | 1.5695 | 1.6692 | 1.6203 | 0.9833 | 1.1021 | 1.4508 | 1.7561 | 1.6142 | 1.4321 | 1.0123 | 0.8884 | 1.4440 |
| CUST_1045_PI416379584 | OR9G4 | 1.6577 | 3.4562 | 1.9602 | 3.6801 | 1.3823 | 2.9874 | 1.8416 | 4.1127 | 1.3573 | 0.7432 | 1.2174 | 2.6833 | 1.8241 | 3.3013 | 1.4903 | 1.1452 | 0.7251 | 2.2055 | 1.6321 | 2.7740 | 1.6576 | 2.3729 | 0.7791 | 2.7057 |
| CUST_154_PI416379584  | OR9G9 | 1.6836 | 2.1444 | 1.5038 | 1.1398 | 2.4296 | 1.8948 | 1.7543 | 1.7182 | 1.4936 | 0.7432 | 1.4172 | 1.7740 | 1.6050 | 1.8176 | 1.5515 | 1.1304 | 0.7152 | 1.4955 | 1.6342 | 1.8336 | 1.9785 | 1.1579 | 1.0614 | 1.4730 |
| CUST_415_PI416573500  | OR9I1 | 2.3601 | 2.2710 | 2.1125 | 1.3101 | 1.1030 | 2.0608 | 2.0703 | 1.7495 | 1.8167 | 2.6051 | 1.6868 | 1.9521 | 1.7865 | 2.8383 | 2.0449 | 1.2758 | 1.0529 | 1.8068 | 1.8501 | 2.1124 | 1.5929 | 1.4089 | 1.3820 | 1.7264 |
| CUST_424_PI416379584  | OR9I1 | 1.6027 | 3.0672 | 1.7062 | 0.9662 | 0.6924 | 1.6195 | 1.5955 | 2.5509 | 1.4392 | 0.7432 | 1.6601 | 1.6370 | 1.5463 | 2.5811 | 2.3494 | 1.4477 | 0.9446 | 1.6052 | 1.5956 | 1.7810 | 2.2916 | 0.9199 | 0.8780 | 3.1778 |
| CUST_452_PI416573500  | OR9K2 | 1.5653 | 1.8642 | 1.4595 | 1.0270 | 0.7582 | 1.6436 | 1.6011 | 1.4911 | 1.4878 | 0.7432 | 1.2550 | 1.6323 | 1.5290 | 1.7527 | 1.6731 | 1.0689 | 0.8092 | 1.4377 | 1.5304 | 1.6649 | 1.9178 | 1.0092 | 2.6082 | 1.4201 |
| CUST_461_PI416379584  | OR9K2 | 2.0043 | 2.2432 | 1.7364 | 1.3785 | 1.0888 | 2.2704 | 2.1271 | 2.1547 | 1.6164 | 5.6809 | 1.6165 | 2.0134 | 1.7910 | 2.1291 | 1.5876 | 1.4899 | 0.9300 | 1.7227 | 1.7950 | 2.0177 | 1.9788 | 1.5960 | 1.2854 | 1.7254 |
| CUST_270_PI416573500  | OR9Q1 | 2.0726 | 1.8428 | 3.2281 | 0.8162 | 1.2339 | 2.1381 | 2.2649 | 2.5172 | 2.3946 | 0.9206 | 1.3124 | 1.4135 | 1.7995 | 3.2506 | 1.3874 | 1.1113 | 0.9946 | 1.4789 | 1.9921 | 1.6394 | 4.4376 | 0.7432 | 1.3783 | 3.3594 |
| CUST_278_PI416379584  | OR9Q1 | 3.0915 | 2.1760 | 2.6533 | 1.2000 | 2.7659 | 2.1076 | 3.1319 | 3.3307 | 2.1269 | 2.6684 | 1.4565 | 1.6113 | 2.2982 | 2.0817 | 2.3606 | 1.3492 | 2.7262 | 2.8990 | 2.4004 | 3.8469 | 3.2332 | 1.2529 | 3.5821 | 3.3478 |
| CUST_345_PI416573500  | OR9Q2 | 2.1563 | 2.0917 | 2.4079 | 1.2527 | 3.0096 | 1.9812 | 2.4026 | 1.8222 | 2.9468 | 0.7432 | 1.6100 | 1.9488 | 1.9532 | 2.0718 | 2.4935 | 2.9290 | 1.0990 | 1.8286 | 2.2575 | 1.9144 | 2.8141 | 1.3470 | 1.6414 | 1.8953 |
| CUST_354_PI416379584  | OR9Q2 | 3.4175 | 2.0769 | 2.4462 | 1.0638 | 0.7943 | 2.2305 | 2.9296 | 3.2136 | 2.2381 | 0.7432 | 1.4637 | 2.4494 | 1.7903 | 2.2077 | 1.4191 | 1.1999 | 1.1523 | 1.8589 | 2.1933 | 2.3804 | 3.4890 | 0.7432 | 0.9332 | 3.5289 |

**Supplementary Table 1 : Expression values of each olfactory receptor in the four amygdala nuclei of six individuals, according to Allen brain atlas.** The 376 genes coding for human olfactory receptors (second column) were quantitated, using at least one DNA probe (first column). Number of copies are reported as log2 values. The 20 olfactory receptors selected for the overall area mapping are highlighted in bold while pseudogenes appear in white font on a grey-black background.
