# Supplementary material for: Limbic Expression of mRNA Coding for Chemoreceptors in Human Brain—Lessons from Brain Atlases
Source: Int J Mol Sci. 2021 Jun 25;22(13):6858. doi: 10.3390/ijms22136858 (PMC8267617; doi:10.3390/ijms22136858)
Supplement: Supplementary file 1 [file ijms-22-06858-s001.zip]

Archive with 5 entries (5 files):
- caption of supplemantaty.pdf
- FigS1.tif
- FigS2.tif
- FigS3.tif
- table S1.pdf
